# Supplementary material for: Assembly of 43 diverse human Y chromosomes reveals extensive complexity and variation
Source: bioRxiv or medRxiv preprint supplement (doi:10.1101/2022.12.01.518658), 2023-06-12
Supplement: Supplementary file [file media-1.pdf]

1  
2  
3  
4  
5  
6  
7  
8  
9  
10  
11  
12  
13  
14  
15  
16  
17  
18  
19  
20

## Supplementary Results and Figures

### Table of contents

|                                                             |       |
|-------------------------------------------------------------|-------|
| Supplementary Results                                       | 2     |
| <i>De novo</i> assembly evaluation                          | 2     |
| Effect of input read characteristics on assembly contiguity | 4     |
| Orthogonal support to Y-chromosomal SVs                     | 4     |
| Gene annotation                                             | 5     |
| Y-chromosomal inversions                                    | 6     |
| Yq12 heterochromatic subregion                              | 9     |
| A Yq12 overview                                             | 9     |
| Yq12 <i>DYZ1</i> and <i>DYZ2</i> repeat analyses            | 111   |
| Yq12 mobile element insertions (MEIs)                       | 12    |
| Functional analysis                                         | 14    |
| Supplementary Figures                                       | 16-78 |
| References                                                  | 79    |

## 21 Supplementary Results

### 22 *De novo* assembly evaluation

23 We evaluated a series of contig alignments, in which we combined different samples and  
24 assemblies as target and query for the alignment process. We selected all contig alignments for the  
25 respective assemblies to the T2T Y reference as a baseline, and ran the following experiments (**Fig.**  
26 **S50**, from left to right): pairing the two closely related African samples NA19317 and NA19347 (with  
27 the TMRCA estimated to be only 200 ya [95% HPD interval: 0 - 500 ya] and therefore considered as  
28 quasi-replicates); considering the four pairs of high- and lower-coverage assemblies; aligning the  
29 Verkko hybrid assemblies to HiFi-only assemblies built with hifiasm v0.16.1-r375<sup>1</sup>, and generating  
30 self-alignments. In all these scenarios, the collected statistics support the view that the Verkko  
31 assemblies have been robustly assembled and contain sample-specific sequences. For example, the  
32 fraction of the query sequences aligned with the maximal mapping quality (MAPQ) of 60 is highest for  
33 the self-alignments (**Fig. S50**, middle row), followed by the quasi-replicate African pair and the  
34 alignments to the HiFi-only hifiasm assemblies. The alignments of the high- and lower-coverage pairs  
35 (**Fig. S50**, middle row, blue boxes) show a drop relative to the aforementioned combinations, which is  
36 consistent with the higher error rate for the lower-coverage assemblies (**Fig. S4**). Next, we checked the  
37 overall (dis-)similarity of the Y assemblies with respect to their k-mer content (**Methods**). Relative to  
38 the GRCh38 Y assembly, all our assemblies plus the T2T Y show a coherent behavior, sharing a  
39 substantial fraction of their constituent k-mers (**Fig. S51**). Notably, the four pairs of high and lower  
40 coverage assemblies do not exhibit any inconsistencies, suggesting that, despite elevated error rate and  
41 increased fragmentation at lower coverages, the assemblies still represent a sample-specific Y  
42 chromosome.

43 We investigated the locations of assembly gaps via aligning all identified Y contigs to the  
44 GRCh38 and CHM13 plus T2T Y reference sequences and assessing the Y-chromosomal alignments  
45 via alignment coverage (**Figs. S52-56, Methods**). Contigs aligning well to the reference sequence were  
46 expected to show coverage of 1, while assembly gaps and poor alignments due to misalignment,  
47 misassembly or structural differences between the assembly and reference sequence should show no or  
48 >1 coverage. The results highlight the Yq12 heterochromatin as the most poorly aligning subregion  
49 (**Fig. S54**), consistent with the presence of the highest number of Y assembly breaks across samples  
50 (**Table S10**) and an overall high variation in the composition of this region across samples (**Fig. 4f**). In  
51 the (peri-)centromeric region majority of the poor alignments were localized to the highly repetitive  
52 centromeric *DYZ3*  $\alpha$ -satellite array (**Fig. S56**). In euchromatic regions the PAR1 and ampliconic  
53 subregion 7 were the most challenging to contiguously assemble. Majority of the poorly aligning  
54 regions in ampliconic region 7 overlap with the P1 palindrome (**Figs. S53**) composed of ~1.45 Mbp

55 inverted segmental duplications 99.97% sequence identity<sup>2</sup>, while in the PAR1 the poorly aligning  
56 regions are broadly distributed (**Fig. S55**).

57 We also compared in more detail the assemblies of the closely related pair of African Y  
58 chromosomes from NA19317 and NA19347, assembled to a similar level of contiguity (NA19317  
59 contiguously assembled from PAR1 to Yq12 in a single contig, while NA19347 has an additional break  
60 at the (peri-)centromeric region). In agreement with the TMRCA estimate, the Y assemblies show high  
61 similarity in structure and sequence (**Fig. S3, Table S6**). Across 23.96 Mbp (PAR1, (peri-)centromeric,  
62 Yq12 and PAR2 regions were excluded as either not contiguously assembled or recombine with the X  
63 chromosome), only 233 nucleotide substitutions and 583 indels summing to a total of 976 base pairs  
64 were identified, translating to a sequence identity of 99.9959% (**Table S6**). A total of 286/583 indels  
65 represent expansions and contractions at polynucleotide tracts and short tandem repeats (STRs).

66 In addition, we used the Bionano optical mapping data to evaluate the quality of the Verkko *de*  
67 *novo* Y-chromosomal assemblies. We identified a total of 94 structural variants (i.e. inconsistencies  
68 between the Verkko assembly and Bionano optical mapping data) from the local *de novo* assembly  
69 results from 25/43 samples using the optical mapping variant calling algorithm (Bionano Solve v3.5.1)  
70 (see Methods section ‘Assembly evaluation using Bionano Genomics optical mapping data’ for details)  
71 (**Table S35**). For the remaining 18/43 samples, none of the detected variants from optical mapping data  
72 passed the filtering thresholds and therefore contain no inconsistencies between the Verkko assemblies  
73 and Bionano optical maps. Detailed investigation of single DNA molecules from optical mapping data  
74 suggest that the majority of detected structural variants (77/94) are correctly resolved in Verkko  
75 assemblies. However, 31/77 variant sites overlap with the hybrid scaffolding conflict sites, indicating  
76 that these sites might need to be further investigated. No single DNA molecules span the remaining  
77 17/94 sites (from 10 samples) and therefore the accuracy of Verkko assemblies can not be evaluated at  
78 these sites. However, 6/17 sites overlap with PAR1 subregion which remains challenging to assemble  
79 due to its sequence composition and sequencing biases<sup>3,4</sup>. Additionally, 3/17 sites overlap with the  
80 *DYZ19* heterochromatic repeat array, composed of highly similar and repetitive sequences, 7/17 sites  
81 overlap with unplaced contigs containing sequences from AMPL6 or AMPL7 subregions, and 1/17 sites  
82 overlap with the AMPL7 subregion suggesting that these sites also need further investigation.

83 An additional assembly evaluation step was performed by aligning single optical mapping  
84 molecules to the Verkko assemblies (**Methods**). This approach identified a total of 2,351 10-kbp  
85 windows in 43 samples which were not covered by optical mapping molecules (**Table S36**). Majority  
86 of these windows (1,798/2,351; in 43/43 samples) overlapped with PAR1, PAR2, (peri-)centromeric  
87 and Yq12 heterochromatic subregions. Additionally, 300/2,351 windows (in 26/43 samples) overlapped  
88 with ampliconic regions (more specifically AMPL1, AMPL2, AMPL5, AMPL6 and AMPL7), all of  
89 which are challenging to contiguously assemble due to their sequence comparison. Only a small  
90 proportion of windows (253/2,351 windows) from 3/43 samples overlapped with X-transposed and X-

91 degenerate regions (XTR1, XDR1 and XDR3; **Table S36**), highlighting regions that would require  
92 further investigation. It is important to keep in mind that while optical mapping data offers an  
93 independent orthogonal validation for the generated assemblies, it loses resolution at heterochromatic  
94 region (due to the lack of restriction enzyme cutting sites) and can struggle to correctly characterize  
95 highly repetitive and complex genomic regions.

## 96 Effect of input read characteristics on assembly contiguity

97 We explored the potential effect of the varying input read set characteristics, such as genomic  
98 coverage or read length N50, on the outcome of the hybrid assembly process. First, we randomly  
99 selected four of the high-coverage samples (HG02666, HG01457, NA19384, NA18989; HiFi coverage  
100 at least 50×, in the following denoted with the prefix “HC” for high coverage where needed to  
101 disambiguate) and re-assembled those with about half of the available HiFi reads, i.e., using around  
102 30× coverage, which is comparable to most of the HiFi datasets used in this study (**Tables S1-S2**). The  
103 lower-coverage assemblies show higher fragmentation as indicated by a considerably larger number of  
104 assembled contigs and a smaller contig NG50 statistic (**Tables S4-S5**). This observation is compatible  
105 with the assumption that higher input read coverage has a positive effect on assembly quality in terms  
106 of contiguity. However, given that not all Y chromosomes of the high-coverage samples could be  
107 assembled contiguously from telomere to telomere (**Tables S5, S7**), it is evident that this factor alone  
108 is not sufficient as an explanatory variable. Moreover, for all four lower-coverage assemblies, the total  
109 assembled length of the Y sequence is increased by two to six megabases compared to their high-  
110 coverage counterparts, which suggests that the total assembly length may be of limited value when  
111 comparing Y assemblies created with substantially different HiFi input coverage (**Table S5**). We  
112 deepened our analysis by training multivariate regression models (**Methods**) to investigate the  
113 relationship between the input read set and quality-related assembly statistics of interest such as the  
114 contig NG50. For this analysis, we augmented our dataset with the four lower-coverage assemblies  
115 described above. The results of the regression analysis confirmed that HiFi input coverage and mean  
116 ONT-UL read length are relevant factors to achieve higher contig NG50 values (**Tables S37-S38**), yet  
117 cannot be sufficient as explained above. Given the small size of our dataset from a statistical point of  
118 view, e.g., including only two samples from haplogroup A (HG02666, HG01890), and these two Y  
119 chromosomes could be assembled in a single contig from telomere to telomere, it is challenging to  
120 derive a robust statement about the factors governing overall assembly quality.

## 121 Orthogonal support to Y-chromosomal SVs

122 We evaluated assembly-derived structural variants called with PAV (using the GRCh38 Y  
123 references sequence, **Table S15-S17, Methods**) by using optical mapping data as an orthogonal support  
124 (**Methods**). The 31 evaluated variants included all 10 inversions, and 9 insertions and 12 deletions  $\geq 5$

125 kbp in size called using PAV. Overall, 20/31 structural variant genotypes (7 deletions, 7 insertions and  
126 6 inversions) were supported by optical mapping data across the majority of the samples where the  
127 variant had been called (**Table S39**). Out of the 12 remaining variants, 5 were located in the (peri-  
128 )centromeric region where optical mapping does not have sufficient resolution. For 6/12 structural  
129 variants (1 deletion, 1 insertion and 4 inversions) the called genotypes were not supported by optical  
130 mapping data indicating that inversions remain the most challenging variant type to call accurately.

## 131 Gene annotation

132 To annotate genomes of *de novo* assemblies of 43 male samples, we used liftoff and  
133 GENCODEv41 GRCh38 annotations, and T2T-CHM13v2.0 chrY annotations (**Table S25**). Annotation  
134 of 43 Y chromosomes presented a number of genes ranging from 580 (HG00358) to 758 (HG02666).  
135 The number of protein-coding genes ranged from 82 (HG00358 and HG03732) to 114 (HG02666), and  
136 the number of pseudogenes from 339 (HG00358) to 457 (NA18989) (**Table S25**). Majority of  
137 differences between GRCh38 Y and T2T Y annotations were due to previously unassembled regions,  
138 gaps, and ampliconic gene copy numbers (**Tables S22-S23, S26**). The single-copy protein-coding genes  
139 were present in all samples, except for 14 genes in PAR1, 1 gene in XDR1 and 1 gene in PAR2 in a  
140 total of 14 individuals, overlapping with poorly assembled regions in those individuals (**Tables S22-**  
141 **S26**). In addition, there are 8 multi-copy protein-coding gene families located in the ampliconic regions,  
142 5 of which showed variation in copy number across the analyzed samples. 3/8 protein-coding gene  
143 families (*VCY*, *PRY* and *HSFY*) showed a constant copy number (2 copies) across all samples. Two of  
144 the assembled samples (HG00358, haplogroup N1c-Z1940 and NA18989, haplogroup C1a-CTS6678)  
145 carry known rearrangements in the *AZFc*/ampliconic 7 subregion - ~1.8 Mbp *b2/b3* deletion and a likely  
146 *gr/rg* duplication, respectively<sup>5-7</sup> and show variation in copy number in genes (*DAZ*, *BPY2* and *CDY1*)  
147 affected by these rearrangements. The *BPY2* gene copy number ranges from 1 to 5 (41/44 samples show  
148 a constant copy number of 3), *CDY* from 3 to 5 copies (39/44 samples show a constant copy number of  
149 4) and *DAZ* from 2 to 6 copies (42/44 samples show a constant copy number of 4). Note that the  
150 accuracy of gene annotation and copy number determination might be impacted by fragmented  
151 assembly in case of a few samples (**Table S22**). The highest variation in copy number across the 43 *de*  
152 *novo* samples was observed for *RBMY* gene (from 5 to 11 copies, 27 copies in T2T Y) and *TSPY* (from  
153 24 to 40, 47 copies in T2T Y; **Tables S22-S23**). The *RBMY* copy number estimates for 14 samples  
154 overlapping with<sup>8</sup> (that used read depth information from low-coverage Illumina data) are highly  
155 concordant with 13/14 samples showing either exactly the same or plus 1 total *RBMY* copy number  
156 estimates, offering independent support to the quality of our Y assemblies.

## 157 Y-chromosomal inversions

158 Inversions have remained one of the most challenging structural variation types to reliably  
159 genotype, especially when flanked by large highly similar segmental duplications. The Y-chromosomal  
160 *de novo* assemblies resolved to basepair level enabled us to confidently identify a total of 16 inversions  
161 (14 in the euchromatic regions and 2 in the Yq12 heterochromatic region) from the 44 individuals (43  
162 assembled here and the T2T Y) analyzed here, to narrow down the breakpoint locations for 10/16  
163 inversions and improve the inversion rate estimates due to higher phylogenetic resolution compared to  
164 previous reports<sup>9,10</sup>.

165 The 14 euchromatic inversions were identified from the *de novo* Verkko assemblies and  
166 independently called using Strand-seq data mapped to both GRCh38 Y and the T2T Y reference  
167 sequences, available for 31/44 samples (see Methods section ‘**Inversion analyses**’) (Tables S27, S40).  
168 In addition, 7/14 of the euchromatic inversions overlapped with inversions called using PAV (Tables  
169 S15, S17; see Methods section ‘**Variant calling using *de novo* assemblies**’). All 14 inversions are  
170 flanked by inverted repeats, showing up to 99.99% sequence similarity between the repeats and up to  
171 1.45 Mbp in size (the P1 palindrome)<sup>2</sup>. The sizes of inversions range from approximately 30 kbp (the  
172 P7 palindrome) to 5.94 Mbp (the IR5/IR5 inversion in HG02666, see more details below) (Table S27,  
173 S29). Combining the maximum sizes of euchromatic regions affected by inversions sums to a total of  
174 approximately 12.18 Mbp or 54.6% of GRCh38 MSY euchromatic composition. 12/14 euchromatic  
175 inversions are recurrent, toggling in the Y phylogeny from two (the *blue2/blue3* or *b2/b3* inversion, Fig.  
176 S22) to 13 times (P3 palindrome composed of 283 kbp inverted repeats which are separated by a 170  
177 kbp spacer region<sup>2</sup>). The two inversions identified in single individuals (the *blue1/blue4* or *b1/b4* in  
178 HG01890 and *IR5/IR5* in HG02666, see more details below) are the largest, approximately 4.2 Mbp  
179 and 5.94 Mbp in size. Overall, across all 44 samples included in the current study, only the most closely  
180 related pair of African Y chromosomes (carried by NA19317 and NA19347) show identical  
181 composition in terms of inversions (Fig. 3a; Table S27), highlighting the high structural variability of  
182 the human Y chromosome.

183 Taking advantage of the sequence resolution offered by the Verkko assemblies, we succeeded  
184 in determining the likely breakpoint ranges for 8 euchromatic inversions down to 500-bp region (Fig.  
185 3b; Figs. S26-S28; Table S29; Methods section ‘**Determination of inversion breakpoint ranges**’),  
186 allowing us to determine the inversion sizes more accurately. According to the GRCh38 coordinates,  
187 the average sizes of breakpoint ranges for palindromes P3-P8 are 33,381 bp (ranging from 1,115 bp in  
188 P3 to 181,342 bp in P4) and 33,203 bp (ranging from 1,117 bp in P3 to 181,342 bp in P4) for proximal  
189 and distal copies of inverted repeats or palindrome arms. The location of breakpoint ranges tend to be  
190 located closer to the spacer region, suggesting that the distance between the breakpoints in the proximal  
191 and distal arms impacts the triggering of an inversion event (Fig. S27). The inversion sizes (for  
192 palindromes P3-P8 and IR3) range from 29,426 bp (palindrome P7) to 3,679,407 bp (IR3) with an

193 average of 714,036 bp, when estimating it based on the start coordinate on the proximal repeat/arm and  
194 the end coordinate on distal repeat/arm of the breakpoint ranges. The inversion size, as well as the size  
195 of the breakpoint range, are positively correlated with the size of palindrome, except for the IR3 repeats  
196 where the unique spacer region (~3.5Mb) is substantially larger than that of any Y palindrome  
197 (Spearman's correlation coefficient between breakpoint range and proximal/distal arm size: 0.8857 (p-  
198 value 0.0333), and between inversion size and proximal/distal arm size: 1.00 (p-value 0.0028) based on  
199 GRCh38 coordinates).

200 Large inversions are mostly responsible for the fact that all three of our contiguously assembled  
201 Y chromosomes are structurally distinct from each other across multi-Mbp euchromatic regions (**Fig.**  
202 **2b,c; Figs. S6-S8, S16, S25**), and from both GRCh38 and the T2T Y sequences, which also differ from  
203 each other due to a known >1.9 Mbp polymorphic *gr/rg* inversion carried by the T2T Y<sup>4,5</sup>. The structural  
204 composition of the *AZFc* region in the deepest-rooting Y chromosome (HG01890 A0b-L1038) can be  
205 explained by two inversions (between the *blue 1* and *blue 4* amplicons, and another between the *blue 2*  
206 and *blue 3* amplicons, **Fig. S22**), up to 4.1 and 1.2 Mbp in size (considering the start and end coordinates  
207 of the respective blue amplicons in the GRCh38 Y), respectively, or three inversions (additionally  
208 requires the *gr/rg* inversion) when compared to the T2T Y (**Figs. 2b-c; Figs. S6, S16 and S25a**).

209 The second deepest-rooting Y chromosome from HG02666 (A1a-M31) carries a P5/P1  
210 inversion and additionally a smaller inversion between *blue 2* and *blue 3* amplicons (**Figs. 2b-c; Figs.**  
211 **S7, S16**). We were able to pinpoint the inversion breakpoints of the P5/P1 inversion into 504-bp  
212 intervals (**Fig. S28**) within ERV1 repeat elements in the IR5 repeats located in inverted orientations in  
213 the distal arm of P5 palindrome and in the proximal arm of the P1 palindrome. The resulting inversion  
214 is 5.941 Mbp in size relative to the Verkko assembly for HG02666, or 6.001 Mbp relative to GRCh38  
215 Y and likely caused by non-allelic homologous recombination (NAHR). Recombination between  
216 palindromes P5 and P1 (both P5/proximal-P1 and P5/distal-P1 deletions, known as *AZFb* deletions) are  
217 known to cause massive deletions and spermatogenic failure, with most breakpoints identified within a  
218 hotspot region within 30 kbp from the center of the P5 palindrome<sup>11</sup>. Interestingly, the inversion  
219 breakpoints identified here do not overlap with the deletion hotspots as they are located ~81.7 kb from  
220 the center of the P5 palindrome. Closer inspection of the sequences of the *blue 2* and *blue 3* repeats  
221 from HG01890 and HG02666 indicates that these are independent inversions and were therefore  
222 counted as independent events in inversion rate calculations.

223 The Y assembly for HG00358 (N1c-Z1940) contains a known ~1.8 Mbp *b2/b3* deletion fixed  
224 in haplogroup N samples (**Figs. 2a-b; Figs. S8, S16 and S25a**)<sup>5</sup>.

225 We detected the *gr/rg* inversion, one of the major structural differences between the GRCh38  
226 Y and the T2T Y sequences, in seven samples (**Fig. 3a; Table S27**), including the two other haplogroup  
227 J samples (HG02492 J2a-M47 and HG01259 J1-M267) which are most closely related to the T2T Y.  
228 The presence of *gr/rg* inversions is also supported by Bionano optical mapping data. Our results on

229 *gr/rg* phylogenetic distribution fit well with previous reports both in terms of the presence of this  
230 inversion in haplogroups B2b-M112, E1b1b1b1a-M81, and its absence in other Y lineages overlapping  
231 between the two studies, although matching the results exactly is not possible due to lower resolution  
232 of typed phylogenetically informative markers by Repping and colleagues<sup>5</sup>. This most likely also  
233 explains the absence of the *gr/rg* inversion in their haplogroup J samples, while indicating that the  
234 inversion is not shared by haplogroup J samples as our phylogeny might suggest, but instead occurred  
235 independently in J1-M267 and its sublineages (carried by HG01259 and the T2T Y) and J2a-M47  
236 (carried by HG02492). However, since we were not able to determine the inversion breakpoints for the  
237 *gr/rg* inversion, we took the conservative approach and counted a total of 5 independent inversions in  
238 the phylogeny (instead of 6 in case the inversions in J1 and J2a were independent). Overall, the  
239 concordance with previous studies supports structurally correct assembly of this complex region in our  
240 dataset.

241 The largest recurrent inversion among our samples is found on the p-arm, mediated by the  
242 inverted IR3 repeats, each approximately 290-300 kbp in size. The IR3 inversions are known to be  
243 polymorphic and reported to be approximately 3.3-3.8 Mbp in size<sup>9,10</sup>. Interestingly, we discovered that  
244 most (33/44) Y chromosomes, including the T2T Y, show a distinct composition of IR3 repeats  
245 compared to the GRCh38 Y sequence (**Fig. S57**). In GRCh38 Y, the distal IR3 repeat contains a single  
246 copy of the ~20.3 kbp *TSPY* repeat (see Method section ‘**TSPY repeat copy number analysis**’) in  
247 direct orientation, while in the majority of samples the single *TSPY* repeat is located in the proximal  
248 *IR3* repeat in inverted orientation (**Fig. 3b; Fig. S57**). Analysis of the *IR3* repeat sequences revealed  
249 that the phylogenetically closely related Y haplogroup QR samples (including GRCh38 Y, mostly  
250 haplogroup R1b) have likely undergone two inversions - a ~3.67 - 3.68 Mbp (relative to GRCh38 Y  
251 sequence) inversion changing the location and orientation of the single *TSPY* repeat from the distal to  
252 proximal repeat, while another, ~3.24 - 3.28 Mbp inversion reverted the region located between the *IR3*  
253 repeats (**Fig. S57; Table S29**). In addition to these two events shared by all QR lineage Y chromosomes,  
254 the *IR3/IR3* inversion was identified in four samples which now carry the genomic region in between  
255 the *IR3* repeats in inverted orientation compared to other samples (**Fig. 3a**), totalling to six inversion  
256 events across all analyzed samples. The inversion breakpoint ranges were narrowed down to regions of  
257 6.7 to 40.1 kbp in size (**Fig. 3b; Table S29**). In two samples (NA19239 and HG03492) the inversion  
258 breakpoints were located closer to the unique spacer region, leading to inversions of ~3.2 Mbp in size.  
259 Interestingly, the inversion breakpoint region in HG03492 overlaps with the second inversion region  
260 shared by all QR samples. In HG03732 and NA19331 the inversions were larger, ~3.4 Mbp in size, and  
261 inversion breakpoints were located closer to the center of IR3 repeats.

262 Additionally, we highlight an inverted duplication which affects roughly two thirds of the 161  
263 kbp unique sequence in the P3 palindrome, spawns a second copy of the *TTY5* gene and effectively  
264 elongates the segmental duplications in this region (**Fig. S25b**). A detailed sequence view reveals a high



265 sequence similarity between the duplication and its template, and its placement in Y phylogeny supports  
266 emergence of this variant in the common ancestor of haplogroup E1a2 carried by NA19239, HG03248  
267 and HG02572 (**Fig. 1a; Figs. S1, S25b**).

268 In addition to the inversions in the euchromatic regions of the Y chromosome, we also identified  
269 inversions at the proximal and distal ends of the Yq12 heterochromatic region, one at each end (**Fig.**  
270 **4c**). The inversion breakpoint analyses at the nucleotide level revealed distinct breakpoints, further  
271 supporting the presence of these two inversion events (**Fig. S29; Table S28**). Alternatively, a complex  
272 rearrangement with multiple breakpoints, resulting in orientation changes of the *DYZ1* and *DYZ2* repeat  
273 units within the distal and proximal ends of the Yq12 region, could have occurred.

274 As some variation was noticed within the proximal inversion region across the 11 analyzed  
275 samples, breakpoint analysis was performed for each assembly separately. For 9/11 examined  
276 assemblies, the 5' breakpoint of the proximal inversion was identified within a *DYZ2* repeat unit at the  
277 3' end of the *Alu* sequence immediately upstream of a second 'orphaned' *Alu* A-tail (Adenosine-rich  
278 sequence) segment (**Fig. S29a**). The 3' breakpoint of the proximal inversion resides within the  
279 intersection of an AT-rich simple repeat region of a *DYZ2* subunit and a *DYZ1* subunit (**Fig. S29a**). For  
280 all of the assemblies analyzed, the 5' breakpoint of the distal inversion is situated at the boundary of an  
281 AT-rich simple repeat and the 5' end of an *Alu* sequence ('head' of the *Alu*) within a *DYZ2* repeat unit  
282 (**Fig. S29b**). Finally, the 3' breakpoint of the distal inversion lies between an AT-rich simple repeat and  
283 the remaining portion of the *Alu* sequence head right before the HSATI satellite (**Fig. S29b**).

284 Across the eleven analyzed samples, three distinct patterns within the proximal inversion region  
285 were observed. While the majority of assemblies shared the breakpoints described above, two  
286 assemblies – HG01106, and HG01890 – showed a deviating pattern. In HG01106 the entire proximal  
287 inversion region seems deleted and additional studies are required to determine if this is shared by other  
288 closely related Y chromosomes, or is sample-specific (rearrangements having occurred in the  
289 lymphoblastoid cell line can not be excluded). To determine the ancestral state of the inversion region,  
290 the HG01890 Y assembly was further investigated. This was deemed particularly important, as  
291 HG01890 represents the deepest rooting Y chromosome lineage in the current dataset. Comparison of  
292 HG01890 with the other Y assemblies revealed the likely presence of deletions encompassing both the  
293 5' and 3' breakpoints of the proximal inversion.

294

## 295 Yq12 heterochromatic subregion

### 296 A Yq12 overview

297 Our comparison of the Yq12 subregion of T2T Y and GRCh38 Y revealed that the distal  
298 section, situated closest to the PAR2 subregion, is structurally distinct from the rest of Yq12 and fully

299 assembled in GRCh38 Y reference sequence. As no evidence of structural variation was found within  
300 this region, we focused on the previously incompletely assembled proximal sections of this region,  
301 including the *DYZI8* repeat array (**Fig. 1a; Tables S9, S11**) in our subsequent analyses of the seven  
302 samples (HG01890, HG02666, HG00358, HG01106, HG01952, HG02011 plus the T2T Y) with  
303 contiguously assembled Yq12 heterochromatic regions.

304 First, we assessed the previously mostly unassembled Yq12 region for its repetitive sequence  
305 composition. Within each of the analyzed genomes, we observed an alternating pattern of two distinct  
306 segments (**Methods**). One segment consists mainly of a tandemly repeated AT-rich simple repeat fused  
307 to a 5' truncated *Alu* element, followed by an HSATI satellite. Comparison with the Yq12 literature  
308 revealed that this arrangement represents a previously described ~2.4 kbp tripartite repeat element,  
309 *DYZ2*<sup>12,13</sup>. The subunit composition in the second segment was less well defined. We noticed that these  
310 sequences mainly contain simple repeats and pentameric satellite sequences, with over 95% (33,677 of  
311 35,370) of all satellites identified as HSATII. Further analyses revealed an association of this sequence  
312 with a ~3.5 kbp repeat called *DYZI*<sup>2,14-17</sup>. Consequently, our analyses support that the alternating repeat  
313 segments be identified as *DYZI* and *DYZ2* arrays. Interestingly, the total number of arrays within  
314 assemblies is positively correlated to the length of the analyzed Yq12 region (two-sided Spearman:  
315 0.90; p-value=0.0056, **Fig. S46, Methods**).

316 Next, we extended the *DYZI* and *DYZ2* array analyses to the two assemblies (HG01928 and  
317 NA19705) with a single gap within the Yq12. Additionally, we included the assemblies of the two most  
318 closely related individuals (NA19317 and NA19347) with an estimated divergence time of ~200 years  
319 despite the presence of multiple contigs to gain a better understanding of the evolution of this region.  
320 For the two assemblies with multiple contigs, we focused our analyses on the arrays that are  
321 continuously assembled and reside at the proximal and distal ends of the Yq12 region. As expected, we  
322 identified copy number variation both with regard to the number of *DYZI* and *DYZ2* arrays and *DYZI*  
323 and *DYZ2* repeat units within the arrays in all four assemblies (**Fig. S47b**). However, the number of  
324 *DYZI* and *DYZ2* repeat arrays within the assembled regions was identical within the two most closely  
325 related genomes (**Figs. S47b, S58**). Furthermore, the *DYZ2* repeat unit copy numbers within 14/20  
326 *DYZ2* arrays between NA19317 and NA19347 were identical (**Fig. S58**). Comparison of these 14 *DYZ2*  
327 arrays with identical repeat unit copy number (encompassing a total of 2,231,881 nucleotides) revealed  
328 only five single nucleotide variants (SNVs) – none of which represented CpG mutations – and one indel  
329 within a homopolymeric adenosine tract. Of the remaining six *DYZ2* arrays, four were located in the  
330 proximal or distal ends of the Yq12 region and showed only minor variation in the *DYZ2* repeat unit  
331 copy number (+/- 1 *DYZ2* repeat units). The last two arrays were not included in the analyses because  
332 of their immediate adjacency to an incomplete assembly region.

### 333 Yq12 *DYZI* and *DYZ2* repeat analyses

334 We examined inter-individual variation with regard to subunit composition of Yq12 *DYZ2*  
335 arrays in greater detail. Across the seven assemblies with fully assembled Yq12 region, the total *DYZ2*  
336 repeat units within the Yq12 region ranged from a minimum of 2,661 *DYZ2* subunits (HG01890) to a  
337 maximum of 6,681 *DYZ2* subunits (HG01106), with a mean of 4,380 units. *DYZ2* repeat units ranged  
338 in size from a minimum of 1,275 bp to a maximum of 3,719 bp, though 98.6% (30,242 out of 30,656  
339 of all *DYZ2* repeat units across complete assemblies) were between 2,000-2,999 bp in length, with a  
340 median length of 2,420 bp (93.7% of all *DYZ2* repeats were 2,420 bp). Sequence composition analysis  
341 suggests that this variation in sequence length is primarily caused either by expansion or contraction  
342 within the AT-rich simple repeat segment of these elements (sample collective mean: 1,415 bp, standard  
343 deviation (SD): 383 bp). The single origin *DYZ2 Alu* sequence had a consistent length (sample collective  
344 mean: 290 bp, SD: 2 bp) and was primarily identified as *AluY*, though at roughly 20% divergence, the  
345 sequence is too diverged to confidently exclude *AluS* origin. The HSATI satellite portion of the *DYZ2*  
346 subunit varied somewhat in size (sample collective mean: 566 bp, SD: 16 bp).

347 Our comparison to the *DYZ2* consensus sequence revealed that *DYZ2* repeat units located within  
348 arrays and positioned closer to the center of the Yq12 region were, on average, less diverged (i.e.,  
349 potentially younger) (**Fig. 4d; Fig. S48**). In contrast, more divergent *DYZ2* repeats were enriched  
350 toward the proximal and distal boundaries of the Yq12 region, with the putative oldest elements detected  
351 within the arrays situated between the distal inversion and the 3' end of the *DYZ* repeat arrays.  
352 Interestingly, this divergence pattern also seemed to be partially reflected within the individual *DYZ2*  
353 arrays where the divergence of *DYZ2* repeats situated closer to the center was generally lower compared  
354 to those near the ends. To investigate ongoing mutation dynamics, we also performed the *DYZ2*  
355 divergence analysis for the two most closely related genomes (NA19317 and NA19347). As expected,  
356 based on the previous *DYZ2* array comparisons, high similarity was uncovered between both genomes,  
357 and a similar divergence pattern as observed within the other genomes (**Fig. S48b**).

358 Next, we constructed a *DYZ2* repeat composition profile for each *DYZ2* array within a genome.  
359 Our inter-*DYZ2* array profile comparison (see **Methods**), performed for each genome separately,  
360 revealed a trend towards *DYZ2* arrays closely situated to one another having higher repeat composition  
361 similarity (**Fig. 4e; Fig. S49**). Curiously, these *DYZ2* array composition similarity heatmaps (**Fig. S49**)  
362 also exhibit what appear to be signals of past waves of amplifications/duplications of *DYZ2* arrays  
363 located between the peripheral Yq12 inversions.

364 Next, we investigated the Yq12 *DYZI* repeat units in greater detail. Due to the low sequence  
365 complexity of the pentameric HSATII satellite and the simple repeat, we were unable to utilize the same  
366 approaches as those performed for the *DYZ2* arrays. Furthermore, an analysis using the previously  
367 published *DYZI* consensus sequence<sup>2</sup> as a query sequence revealed an overall high divergence (~25%),  
368 further confounding downstream analyses. Based on these findings, two different approaches were

369 pursued: (1) a virtual restriction digestion of the *DYZI* array sequences with HaeIII that cuts DNA at  
370 *ggcc* sites<sup>18</sup>, and (2) a targeted HMMER analysis<sup>19</sup>. The HaeIII restriction enzyme was selected based  
371 on previous molecular biology experiments of the *DYZI* repeats in the Yq12 subregion, where the  
372 enzyme was shown to cut the repeat unit once, primarily resulting in fragments with 3,564 bp in length<sup>18</sup>.  
373 While our virtual digestion of the putative Yq12 *DYZI* array regions of all complete assemblies showed  
374 a similar enrichment for 3,564 bp size fragments, we also observed considerable sequence length  
375 variation (Min: <25 bp, Max: >200 kbp) (**Fig. S59**). Visualization of the distribution of fragment lengths  
376 within *DYZI* arrays revealed a highly similar pattern across the seven complete Yq12 assemblies (**Fig.**  
377 **S59**).

378 To explore the repeat composition of restriction fragments, we performed a k-mer profile  
379 similarity analysis. Considering that the first *DYZI* array is adjoining the Yq11 *DYZI8*, 3.1-kbp, and  
380 2.7-kbp repeat transition region, each digestion fragment was classified as being a unit, or a  
381 composition, of either *DYZI8*, 3.1-kbp repeat, 2.7-kbp repeat, or *DYZI*. Compellingly, the findings of  
382 the *DYZI8* and transition region analysis within the Yq11 were supported and reiterated by this analysis  
383 (**Figs. S38, S41**). The k-mer profile dissimilarity analysis indicated that the 3.1-kbp repeat showed  
384 higher similarity to the *DYZI8* repeat (91%), and the 2.7-kbp repeat to *DYZI* (85%), suggesting that the  
385 Yq11/Yq12 transition zone repeats (3.1-kbp and 2.7-kbp) are possibly derived from *DYZI8* and *DYZI*  
386 (**Fig. S41**). Lastly, the virtual digest and HMMER analyses were combined where after digestion  
387 fragment classification, a targeted HMMER analysis was performed to partition restriction fragments  
388 into their individual repeat subunits (**Fig. S38**).

389 While previous studies reported a ratio of *DYZI* to *DYZ2* repeat units as 2 to 1<sup>13,20,21</sup>, we  
390 observed a nearly equal repeat unit ratio (collective sample mean *DYZI:DYZ2* ratio: 1.09) within the  
391 Yq12 (**Fig. 4b; Table S34**). These findings align with our observation of a nearly 60:40 ratio of total  
392 nucleotides accounted for by *DYZI* and *DYZ2* across all analyzed assemblies. Finally, the dissimilarity  
393 of *DYZI* repeats versus the constructed *DYZI* consensus sequence was computed and visualized (see  
394 **Methods**). This analysis mirrored findings of the *DYZ2* repeat divergence analysis, with *DYZI* subunits  
395 located near the center of *DYZI* arrays tending to be less dissimilar (i.e., less diverged) than those found  
396 near the boundaries of arrays (**Fig. S40**).

### 397 Yq12 mobile element insertions (MEIs)

398 The Yq12 region was screened for the presence of mobile element insertions (MEIs) generated  
399 by the target-primed reverse transcription mechanism in both the *DYZI* and *DYZ2* arrays. Four putative  
400 *Alu* insertions were identified across the seven samples with full Yq12 assemblies (**Fig. 4f**). While three  
401 of the insertions resided within the *DYZ2* repeat unit, the fourth insertion was located within the *DYZI*  
402 repeat unit. Based on the divergence (3% or less), all four putative insertions appeared considerably  
403 younger than the *Alu* sequence of the composite *DYZ2* repeat unit. Furthermore, all *Alu* elements

404 harbored hallmarks of classical MEIs such as target site duplications, termination in an adenosine-rich  
405 tail, and endonuclease cleavage site (**Table S31**). Two of the insertions were identified as *AluY* and one  
406 each as *AluYe5*, and *AluYb8*. Both *AluY* insertions occurred within the AT-rich simple repeat region  
407 of the *DYZ2* repeat; though at different locations and not within the same repeat unit. The *AluYb8*  
408 element inserted into a *DYZ1* repeat; while the *AluYe5* element inserted immediately upstream of the  
409 5' *Alu* sequence of one *DYZ2* repeat and in 'sense orientation' relative to *DYZ2*.

410 *Alu* elements are unique in that the ancestral state (i.e., absence of the MEI) is known and the  
411 precise removal of a MEI is exceedingly rare<sup>22</sup>. Based on this, the approximate age of the insertions,  
412 and presence in all Y chromosome lineages, it can be inferred that the two *AluY* insertions have occurred  
413 early in human Y chromosome evolution prior to the rise of the now known Y chromosome lineages.  
414 Only the T2T Y assembly lacked evidence for one of the two *AluY* insertions. Based on its phylogenetic  
415 placement, this likely results from a deletion or gene conversion of repeat units harboring the insertion  
416 (**Fig. 4f**). The *AluYe5* insertion is unique to HG01890, and the *AluYb8* element to HG01952. Further  
417 analysis revealed that the *AluYb8* element is shared with HG01928 (assembly of the Yq12 subregion is  
418 not contiguous), supporting insertion in a common ancestor of HG01952 and HG01928 (**Fig. 4f; Table**  
419 **S31**).

420 While there is little evidence for post-insertion expansion of the *AluYb8* element in the *DYZ1*  
421 repeat, the MEIs within a *DYZ2* repeat show varying degree of expansion with considerable inter-  
422 individual variation (**Fig. 4f**). For example, one *AluY* insertion was identified in six out of seven  
423 assemblies with a copy number range from one (in HG01106) to seventeen (in HG02666). This further  
424 highlights the enormous inter-individual variation of the human Yq12 region. Furthermore, from the  
425 MEI patterns it can be inferred that the insertions occurred into different repeat arrays and that the  
426 expansion/duplication occurred independently for each MEI. Interestingly, each MEI insertion and their  
427 extensions occupy distinct areas within the Yq12 region with no overlap between the different MEIs  
428 (**Fig. 4f**).

429 These findings, in conjunction with the overall *DYZ1* and *DYZ2* array expansion/contraction  
430 dynamics, point toward random unequal crossing over between sister chromatids for the subsequent  
431 expansions of the *Alu* elements as well as the duplication or deletion of *DYZ1* and *DYZ2* arrays<sup>23</sup>.  
432 Unequal crossing over would also explain the expansion and contraction of repeats within these arrays  
433 without changing the repeat pattern<sup>23</sup>, though gene conversion and replication slippage as contributing  
434 factors cannot be ruled out. The lower interindividual variation with regard to array number, array size,  
435 and *DYZ1/2* repeat units of the inversion regions and arrays distal to the inversions at the proximal and  
436 distal ends of the characterized repeat region is in agreement with the known recombination and  
437 crossing-over suppression of inversions<sup>24</sup>. Furthermore, a reduction in unequal crossing over  
438 near/within the Yq12 inversions could protect against deleterious effects outside the heterochromatin  
439 region such as gene-containing regions of the Y chromosome.

## 440 Functional analysis

441 DNA methylation calls on the ONT reads were derived from Nanopolish<sup>25</sup>, after methylation  
442 calling and QC (**Methods**) we used pycoMeth<sup>26</sup> to *de novo* segment the methylation profiles of the 41  
443 QCed samples (**Fig. S31**). This resulted in the identification of 2,861 independent segments (**Table**  
444 **S32**). To identify the global impact of the different haplogroups on the segmentation we used a  
445 permanova test. Specifically we grouped haplogroups into 6 meta groups based on sample size and  
446 genetic distance, haplogroup A, B and C (“ABC” 4 samples), G and H (“GH” 2 samples), N and O  
447 (“NO” 6 samples), and Q and R (“QR” 11 samples), E (19 samples), J (4 samples - including NA24149,  
448 the father of HG002/NA24385), **Methods**). These grouped haplogroups explain 21% of the global  
449 variation in DNAm levels profiles (Permanova,  $P$  0.0029). On a segment level we found that 340  
450 segments are differentially methylated (DM) (FDR 20%, **Table S32**, (**Methods**)). Interestingly 218  
451 (64%) of the segments have decreased DNAm levels in the QR haplogroups. The 340 DM segments  
452 are enriched to overlap regulatory information (Fisher exact  $P < 2.2e-16$ , odds ratio: 6.72), but depleted  
453 in overlap to genes (Fisher exact  $P$  2.088e-05, odds ratio: 0.52, **methods**, **Table S32**).

454 Next to the effects of haplogroups on DNAm we tested for local DNA methylation quantitative  
455 trait loci (meQTLs). We leveraged the limixQTL pipeline to test for effects of genetic variation with  
456 100,000 bases around the DNAm segment as identified using pycoMeth. We controlled for population  
457 structure by controlling for population as a random effect, and leveraged permutations to determine  
458 significance of effects (supplementary methods). We identified 10 segments with significant meQTLs  
459 (FDR 20%) and found a total of 194 meQTL effects. The majority of the effects are linked to SNVs  
460 (109), with 1 variant being an INV, and 1 effect being from a 171 base-pair insertion (**Table S33**).

461 Given that expression data is available only on a subset of the HGSVC and HPRC samples  
462 (21/44) we focussed on the 210 males from the Geuvadis project<sup>27</sup> to assess the effects of haplogroups  
463 on gene expression level. We find 64 of the 205 genes on chromosome Y expressed in the Geuvadis  
464 LCL gene expression data (**Table S41**). As with DNAm we first tested for global expression variation,  
465 here we leveraged the first character of the haplogroup as grouping (“E”:44, “G”:4, “I”:23,  
466 “J”:18, “N”:22, “R”:96, “T”:3 (group:nSamples)), and find that Y haplogroup explains 4.8% of the  
467 variation in gene expression (Permanova,  $P$  0.005), and in total 22 genes are significantly differentially  
468 expressed (FDR 10%). Even though the samples and Y haplotype distribution is different between the  
469 DNAm samples and the Geuvadis data we find 5 genes (*BCFORP1*, *LINC00280*, *LOC10096911*,  
470 *PRKY*, *UTY*) that have both DNAm effects as well as gene expression effects. Specifically *BCORP1*  
471 is interesting as the effect directions on average match between the Geuvadis and HGSVC expression  
472 datasets and the expression effect is negatively correlated ( $r$  -0.3;  $p$ :0.1) between the overlapping  
473 HGSVC samples (**Fig. S32**).

474 To demonstrate the utility of these highly contiguous Y assemblies in representing the genic  
475 diversity of other individuals, we analyzed full-length cDNA sequences (PacBio Iso-Seq) of testis

476 samples from seven anonymous donors (**Methods**). Of 30 Y-chromosomal genes expressed with at least  
477 five cDNA reads, 23 had improved transcript alignments compared to the T2T Y reference sequence,  
478 which provided only equal or inferior alignments (**Fig. S60; Table S42**). Most notably, *DAZ2*  
479 transcripts had alignments improved by 15.5% on average, due to the variable internal repeat structure.  
480 Across all genes, a full 19% of the improved alignments came from the Y assembly of a single sample,  
481 HG01596. We also generated Iso-seq data on eight matched samples corresponding to *de novo* Y  
482 assemblies (**Fig. S61; Table S43**). Aligning to a matched *de novo* Y assembly instead of the T2T Y  
483 reference improved between 14-51% of cDNA alignments.

484 Hi-C data has been widely utilized to characterize the 3D structure of the genome and identify  
485 chromatin structures, such as topologically associated domains (TADs) that play central roles in gene  
486 regulation. Previous research has primarily focused on Hi-C data analysis in autosomes, while here we  
487 investigate the variation of chromatin structures in diverse Y chromosomes. Using Hi-C data available  
488 from 40 samples, we identified TADs and TAD boundaries for Y chromosomes of these individuals by  
489 evaluating their insulation scores, which indicate the variations of the contact density of every Hi-C bin  
490 compared to adjacent bins (**Fig. S62-S63; Methods**)<sup>28</sup>. Regions with high insulation scores are more  
491 likely to be found inside TADs and regions among TADs intend to have low insulation scores. In total,  
492 112 TAD boundaries at 10 kbp resolution were detected in our merged callset of 40 samples (**Table**  
493 **S44**). We illustrated the average and variance (maximum difference between any of the two samples)  
494 of insulation scores of each sample to indicate the changes of chromatin structures together with the  
495 corresponding methylation profiles and chrY assembly (**Figure S31b**). For the 340 DMRs which are  
496 detected in the aforementioned methylation analysis, we performed Kruskal-Wallis H tests (FDR 20%)  
497 with the same 6 meta haplogroups on the insulation scores (10 kbp resolution) in each DMR to detect  
498 regions that are differentially methylated as well as differentially insulated. Among the 26 DMRs that  
499 intersected with 21 differentially insulated regions (DIRs), we found one of such region (DMR: chrY-  
500 7289920-7290751, DIR: chrY-7290001-7300000) that harbors the *PRKY* gene which is both  
501 differentially DNA methylated and differentially expressed (**Table S45**).

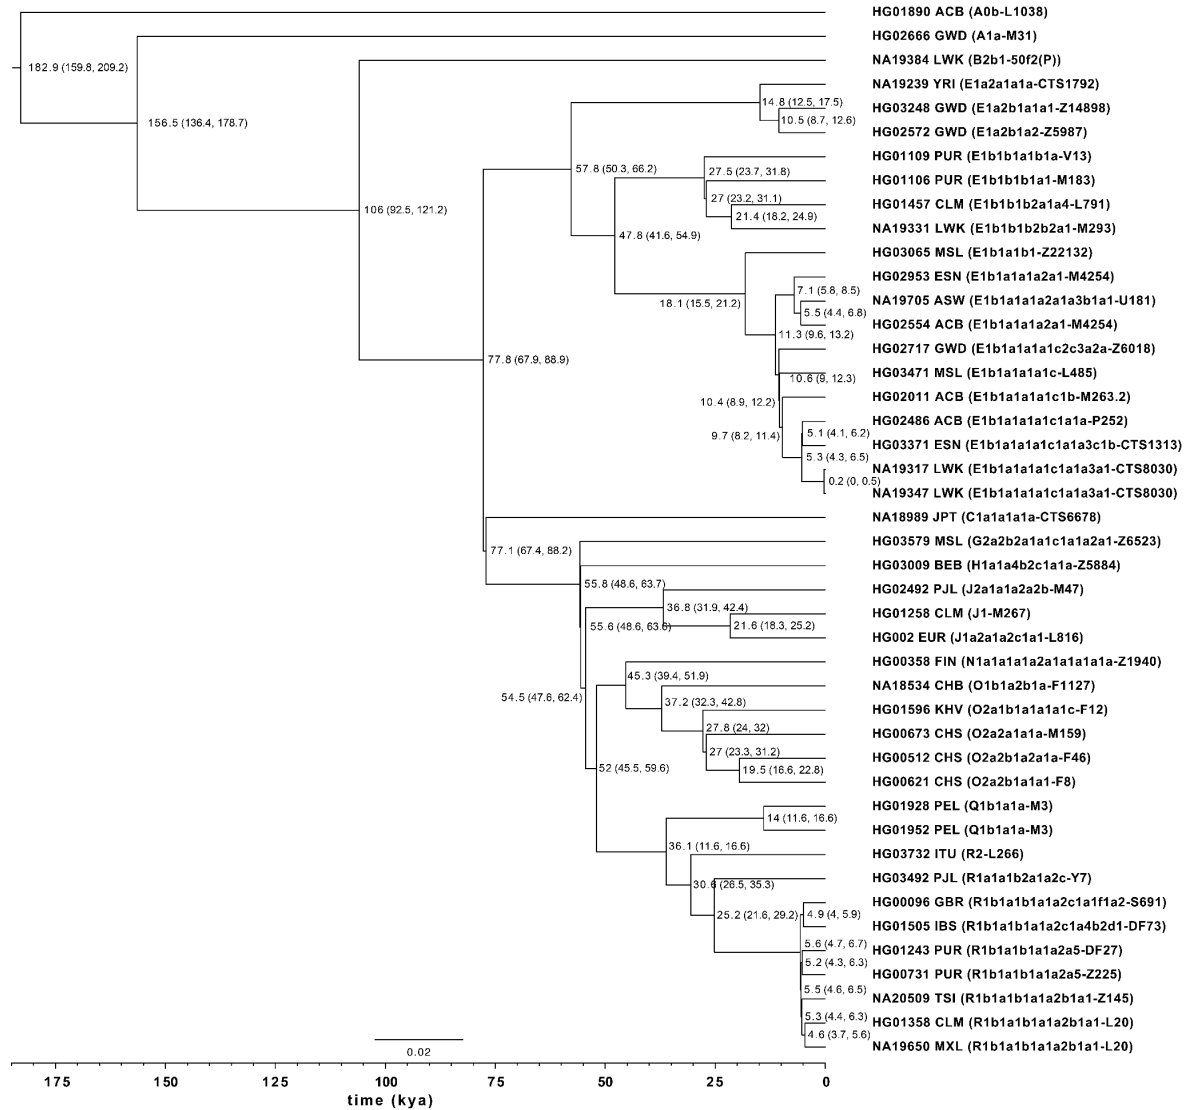

503  
 504 **Figure S1.** Phylogenetic relationships of the analyzed Y chromosomes. Split times as estimated according to the  
 505 BEAST analysis are shown with 95% HPD interval in brackets (kya - thousand years ago). Sample ID is followed  
 506 by population designation, full Y haplogroup label according to ISOGG v15.73 and terminal marker ID.  
 507 Population abbreviations: ACB - African Caribbean in Barbados; ASW - African Ancestry in SW USA; BEB -  
 508 Bengali in Bangladesh; CHB - Han Chinese in Beijing, China; CHS - Han Chinese South; CLM - Colombian in  
 509 Medellín, Colombia; ESN - Esan in Nigeria; FIN - Finnish in Finland; GBR - British From England and Scotland;  
 510 GWD - Gambian in Western Division – Mandinka; IBS - Iberian Populations in Spain; ITU - Indian Telugu in  
 511 the U.K.; JPT - Japanese in Tokyo, Japan; KHV - Kinh in Ho Chi Minh City, Vietnam; LWK - Luhya in Webuye,  
 512 Kenya; MSL - Mende in Sierra Leone; MXL - Mexican Ancestry in Los Angeles CA USA; PEL - Peruvian in  
 513 Lima Peru; PJJ - Punjabi in Lahore, Pakistan; PUR - Puerto Rican in Puerto Rico; TSI - Toscani in Italia; YRI -  
 514 Yoruba in Ibadan, Nigeria.



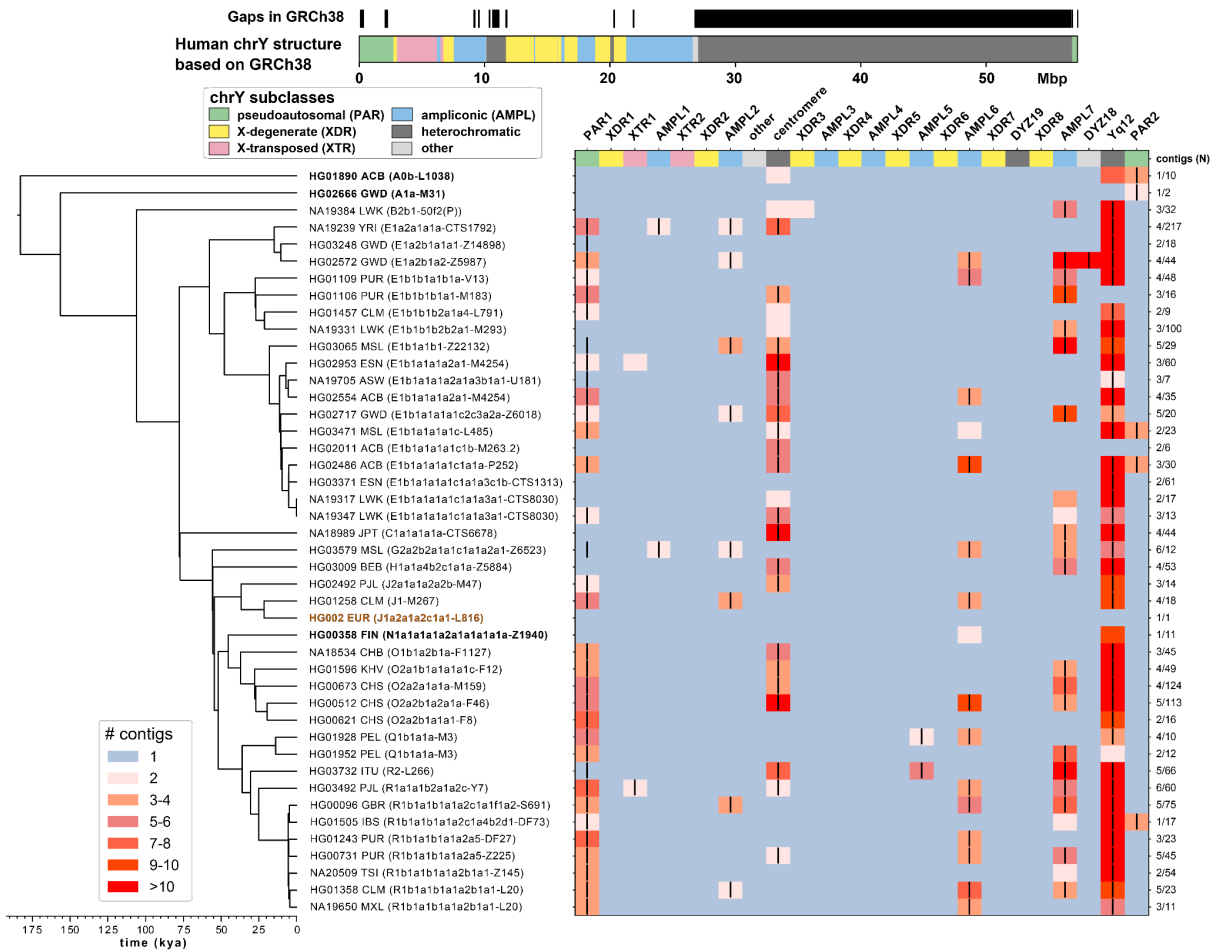

515  
516  
517  
518  
519  
520  
521  
522  
523

**Figure S2.** Phylogenetic relationships of the analyzed Y chromosomes and assembly completeness. Phylogenetic relationships of the analyzed Y chromosomes with branch lengths drawn proportional to the estimated times between successive splits according to BEAST analysis. Summary of Y assembly completeness with the number of contigs containing sequence from specific sequence class indicated with different colors (on the right - number of Y contigs needed to achieve the plotted assembly contiguity/total number of assembled Y contigs for each sample). Sample IDs include the population abbreviation, and the full Y lineage and terminal marker in brackets. See Figure S1 for population abbreviations.

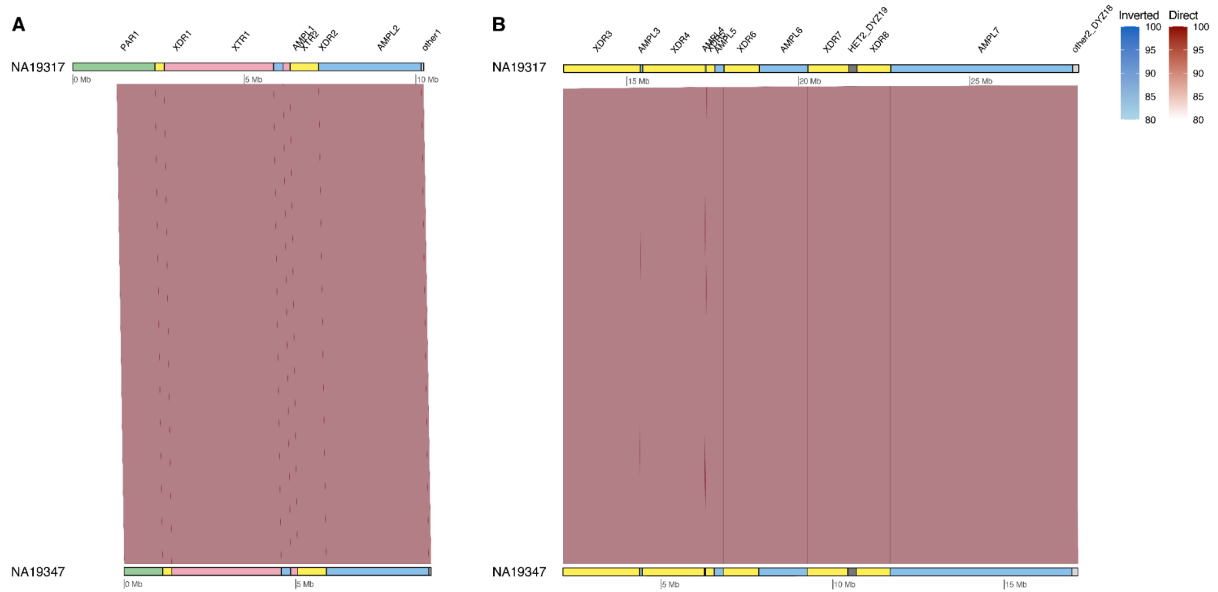

524

525 **Figure S3.** Comparison of the Y assemblies from closely related African Y chromosomes (NA19317 vs  
 526 NA19347). Comparison of contiguously assembled regions spanning: **A.** from PAR1 until the end of other1, and  
 527 **B.** from XDR3 to the end of *DYZ18*. Pairwise sequence alignments of 21/24 contiguously assembled Y-  
 528 chromosomal subregions showed sequence identity ranging from 99.982% to 100% (**Table S6**), with 100%  
 529 sequence identity in three subregions (other1, *DYZ19* and *DYZ18*). Eight subregions (XDR1, XTR2, XDR2,  
 530 XDR3, AMPL3, AMPL4, XDR6, and XDR8) have no substitutions and the number of indels range from 2 to 26.  
 531 XTR1 subregion shows the lowest sequence identity (99.982%) with 185 mismatches and 389 indels/gaps in the  
 532 alignment.

533

534

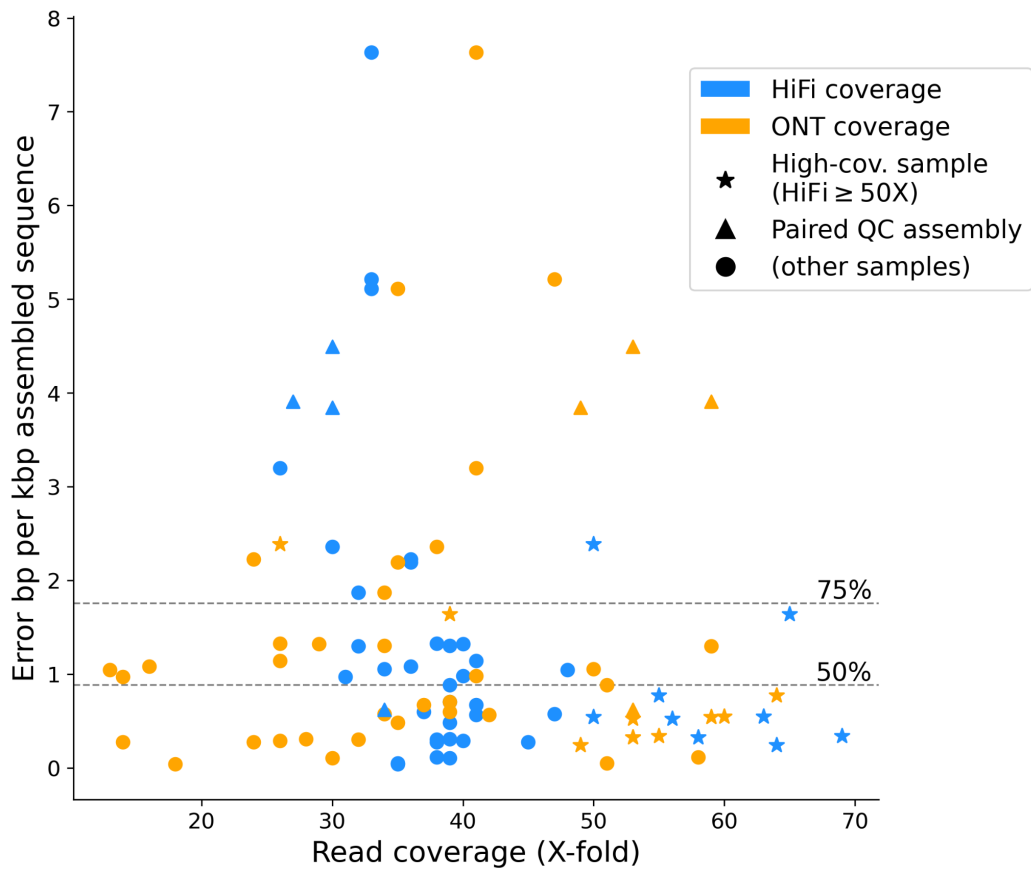

535

536 **Figure S4.** Scatter plot of input read coverage for both ONT (orange) and HiFi (blue) per sample (X-fold coverage  
537 relative to a ~3.1 Gbp genome size, x-axis) and putative assembly errors (flagged bp per kbp assembled sequence,  
538 y-axis). “Star” markers highlight high-coverage samples. “Triangle” markers indicate assemblies created for QC  
539 purposes using approximately half of the HiFi coverage of the respective high-coverage sample. Dashed horizontal  
540 lines indicate the second and third quartile of samples.

541

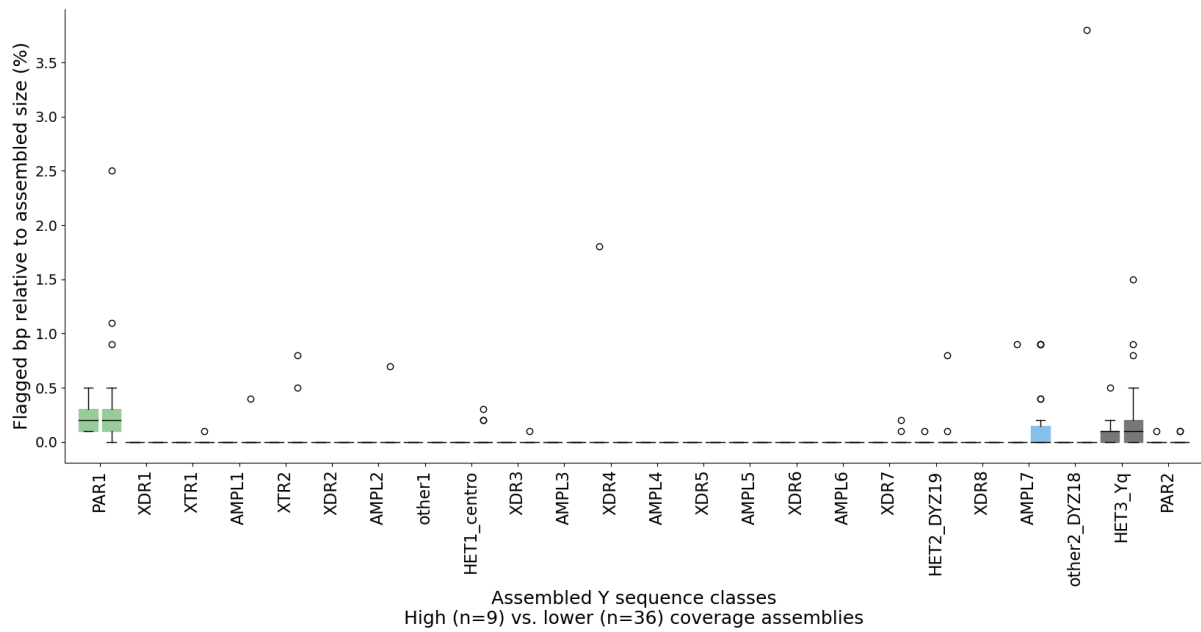

543

544

545

546

547

548

549

550

**Figure S5.** Comparison of putative assembly errors in high- and lower-coverage assemblies per Y sequence class. Errors are depicted as percent of bp flagged as potentially erroneous for high-coverage (n=9, left boxplots) and lower-coverage assemblies (n=36, right boxplots). Boxplots are colored according to the Y sequence class (**Fig. 1a**). Distributions of annotated errors were compared per each sequence class using a two-sided Mann-Whitney-U test. The differences are not statistically significant at  $\alpha = 0.05$  after multiple testing correction (Benjamini-Hochberg).

551

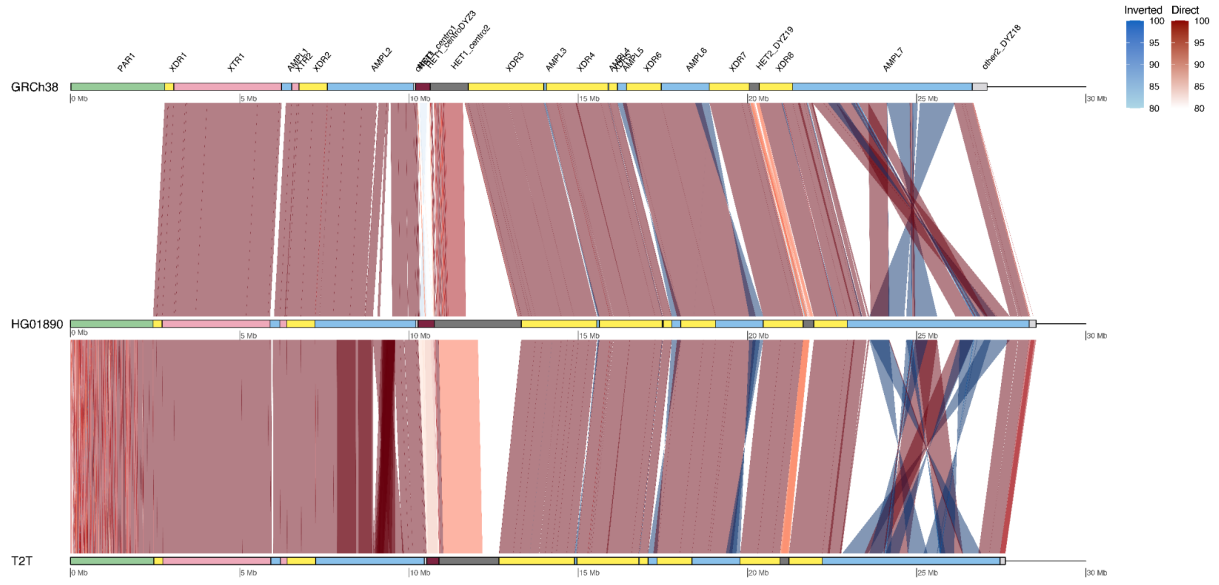

552

553 **Figure S6:** Comparison between GRCh38, HG01890 and T2T Y.

554

555

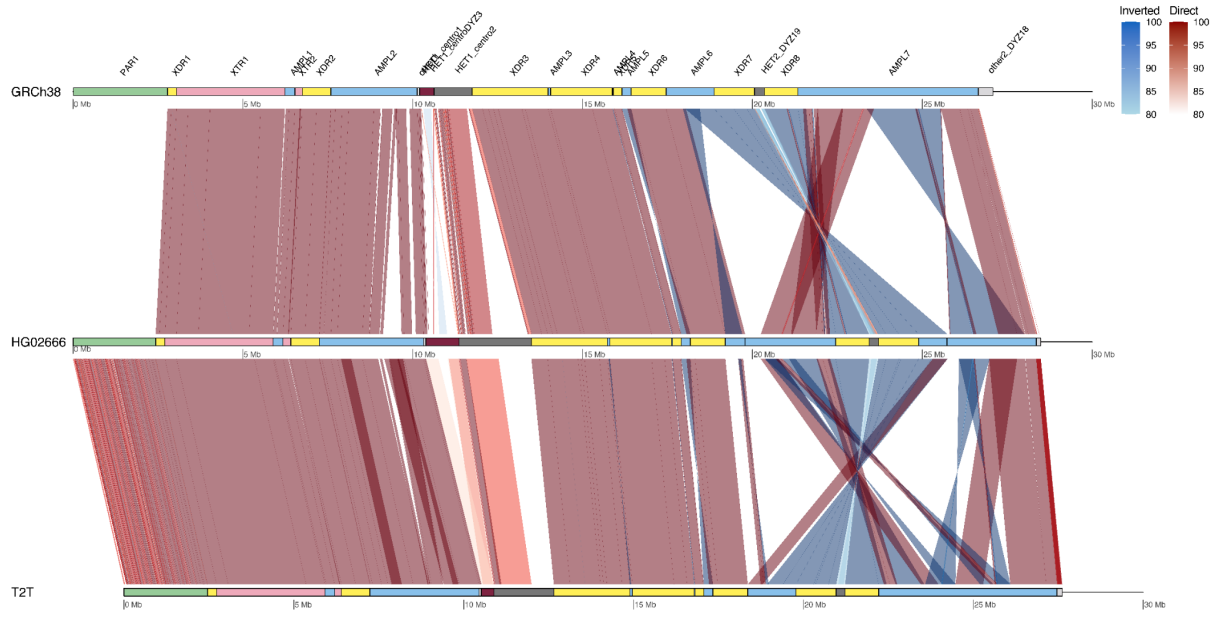

Figure S7: Comparison between GRCh38, HG02666 and T2T-T.

559

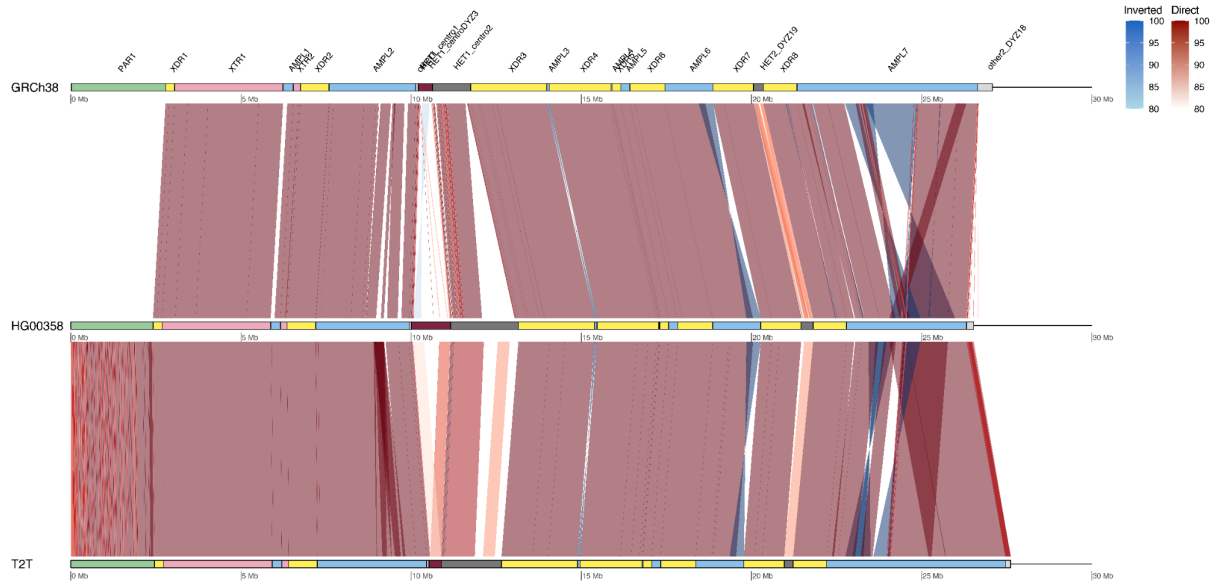

560

561

Figure S8: Comparison between GRCh38, HG00358 and T2T Y.

562

563

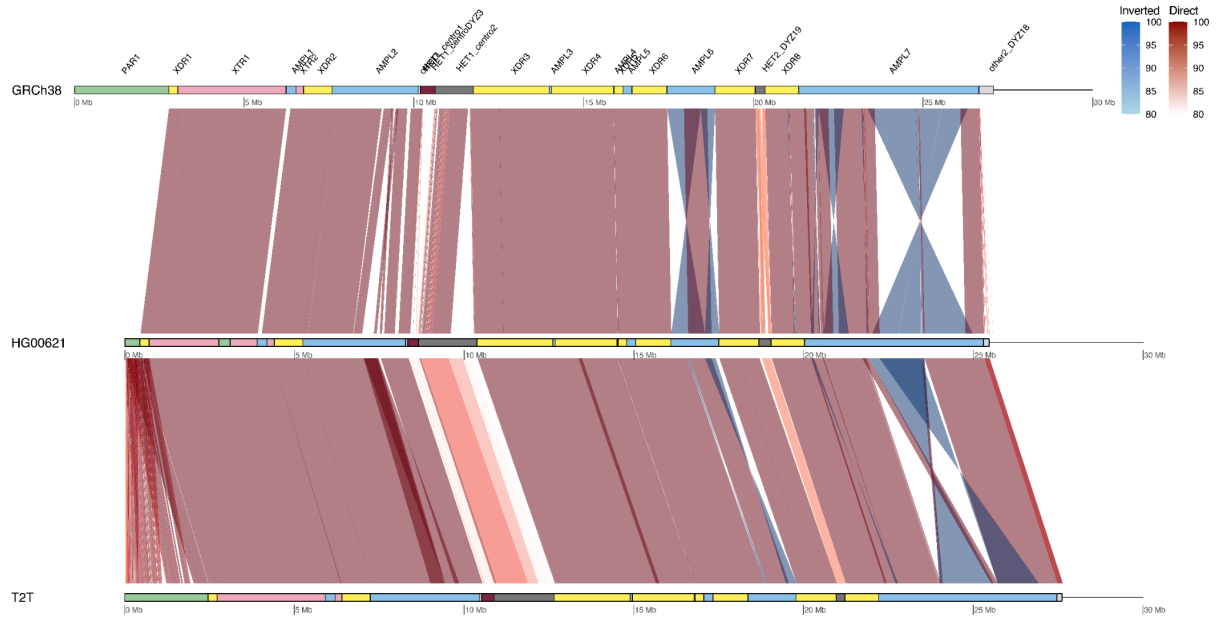

564

565

**Figure S9:** Comparison between GRCh38, HG00621 and T2T Y.

566



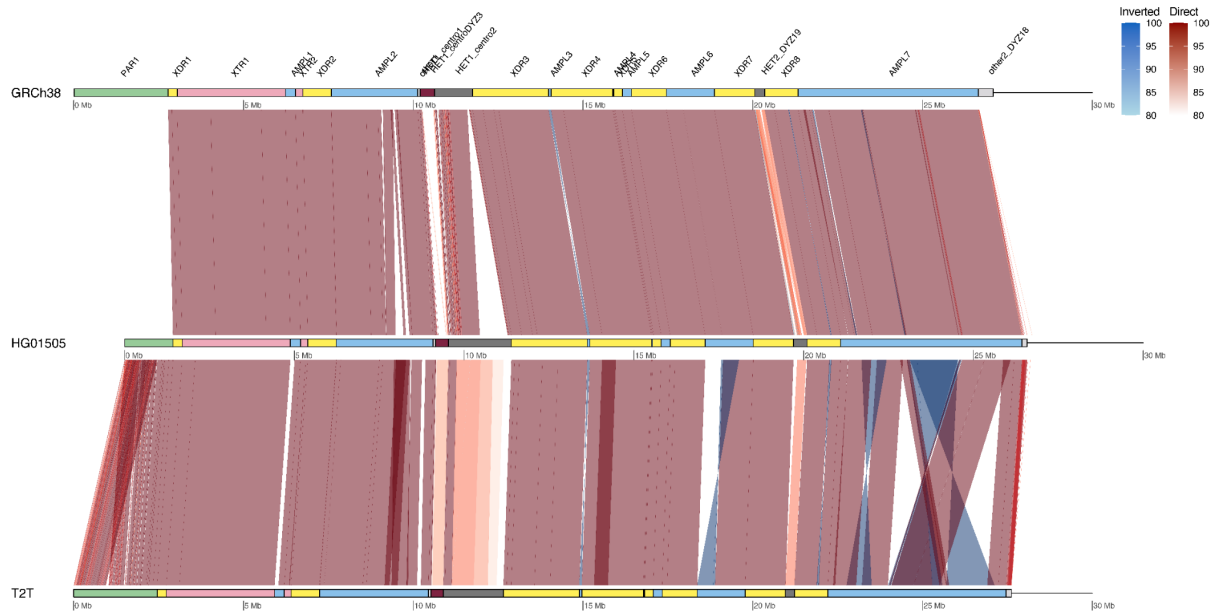

567

568 **Figure S10:** Comparison between GRCh38, HG01505 and T2T Y. Note - GRCh38 and HG01505 are  
 569 phylogenetically closely related, both representing haplogroup R1b. Highly similar assembly and lack of large  
 570 difference between GRCh38 and HG01505 supports accuracy of our de novo assemblies.  
 571

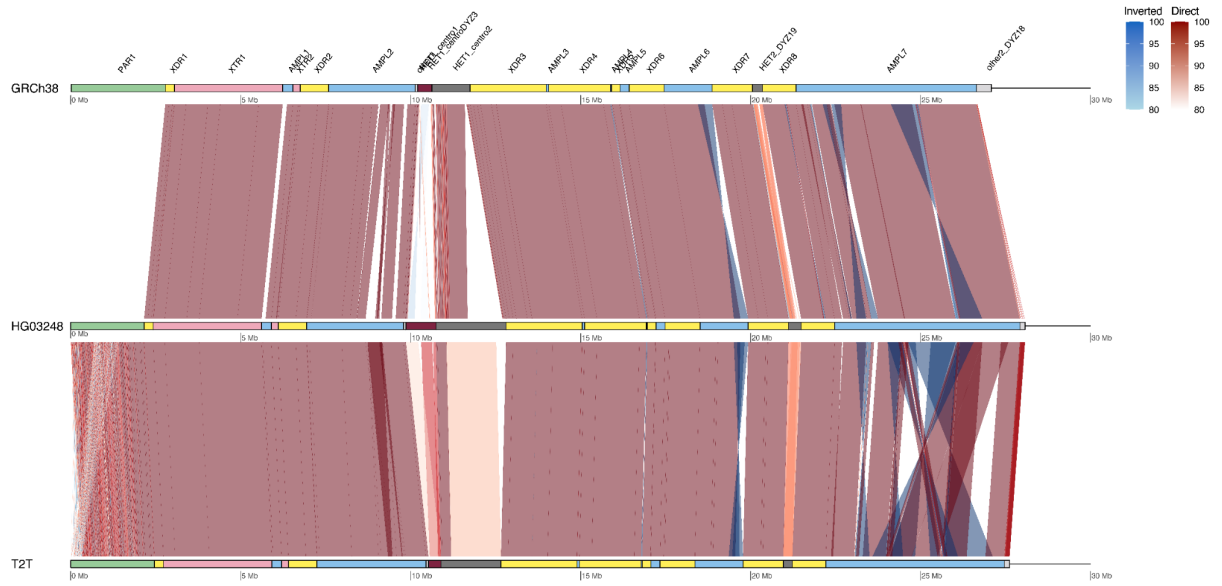

572

573 **Figure S11: Comparison between GRCh38, HG03248 and T2T Y.**

574

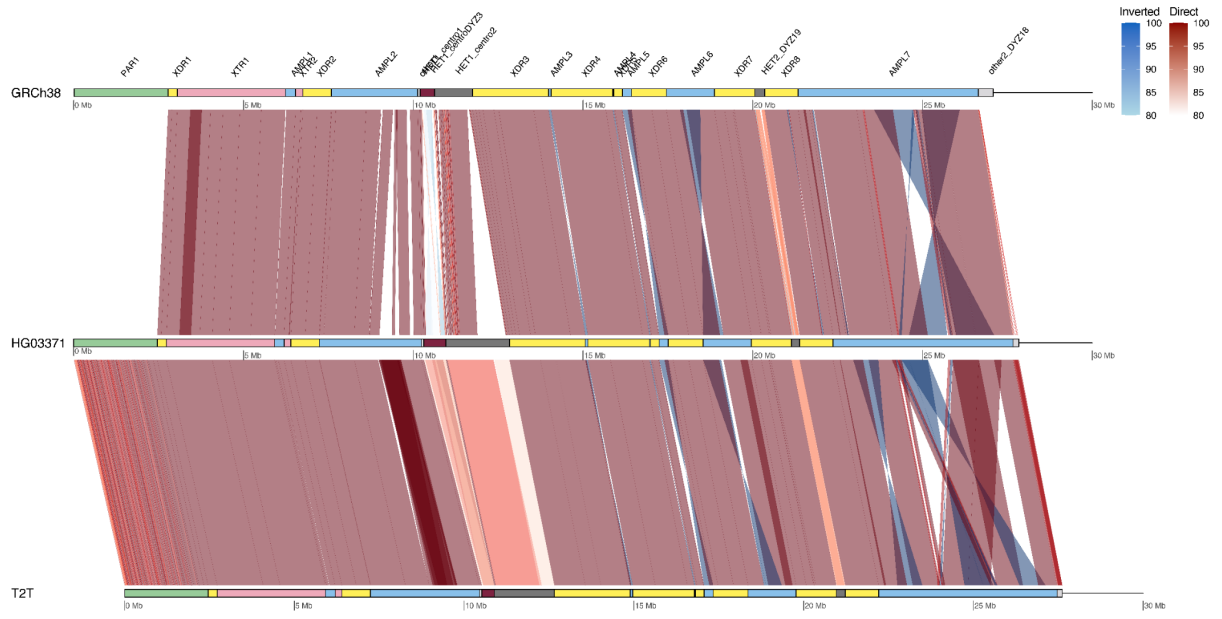

575

576 **Figure S12:** Comparison between GRCh38, HG03371 and T2T Y.

577

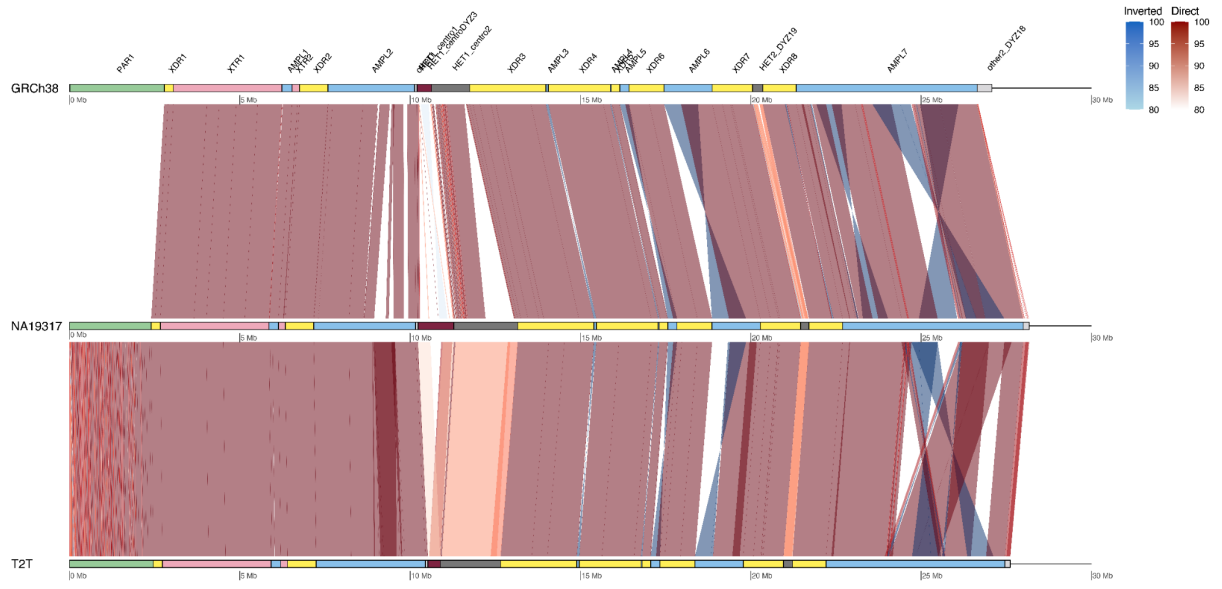

578

579 **Figure S13:** Comparison between GRCh38, NA19317 and T2T Y.

580

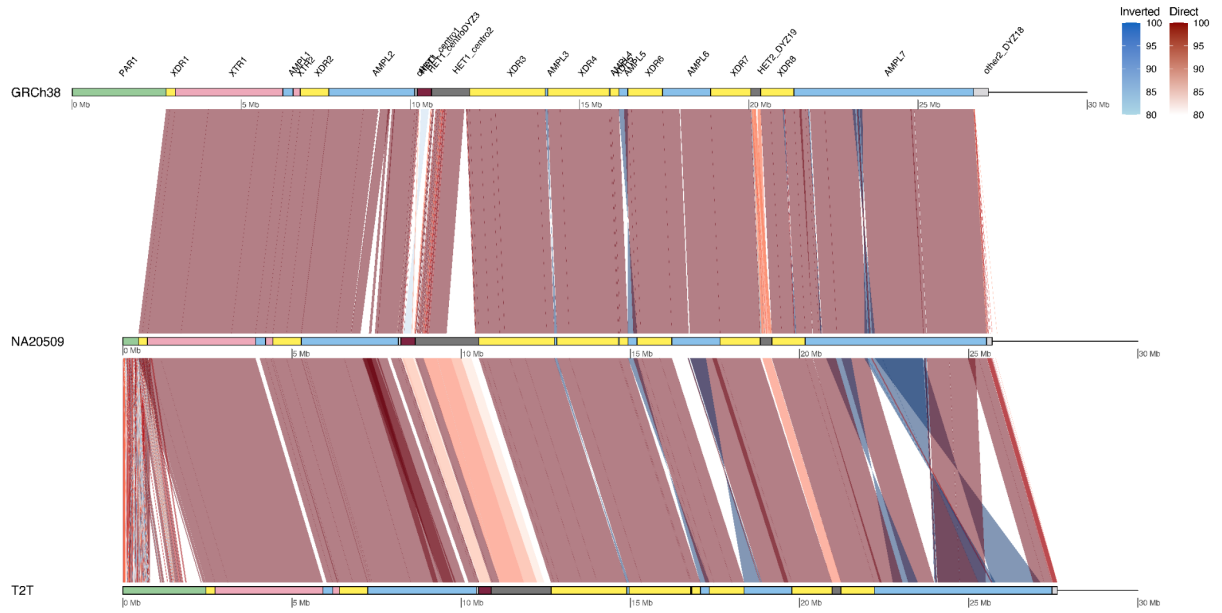

581

582 **Figure S14:** Comparison between GRCh38, NA20509 and T2T Y.

583

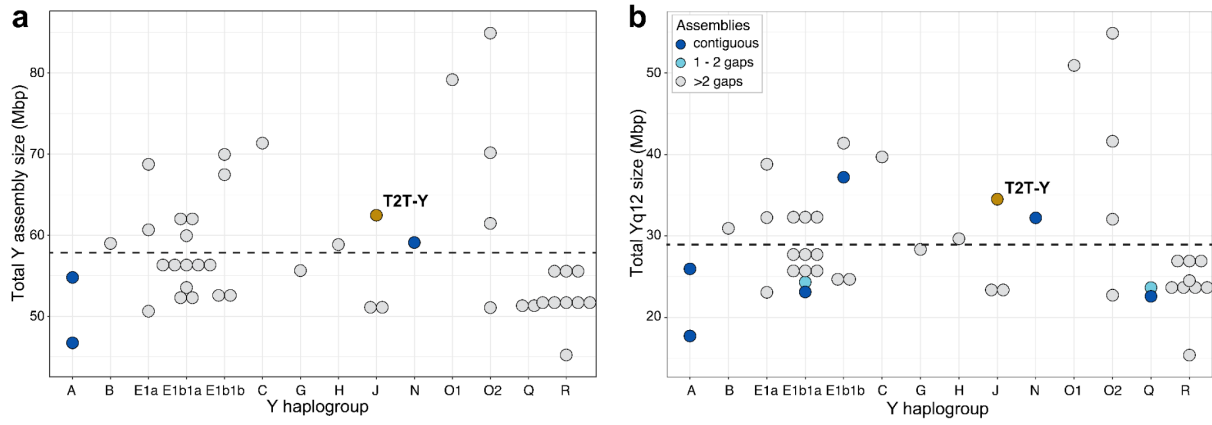

584

585

586

587

588

589

**Figure S15.** Y assembly sizes across Y haplogroups. **a.** The total combined Y assembly size. **b.** The total combined Yq12 subregion size. Samples with contiguous assembly, with 1-2 or more gaps and the T2T Y are indicated with different colours. Black dashed line indicated the mean (57.6 Mbp for total Y assembly and 29.0 Mbp for the Yq12 subregion).

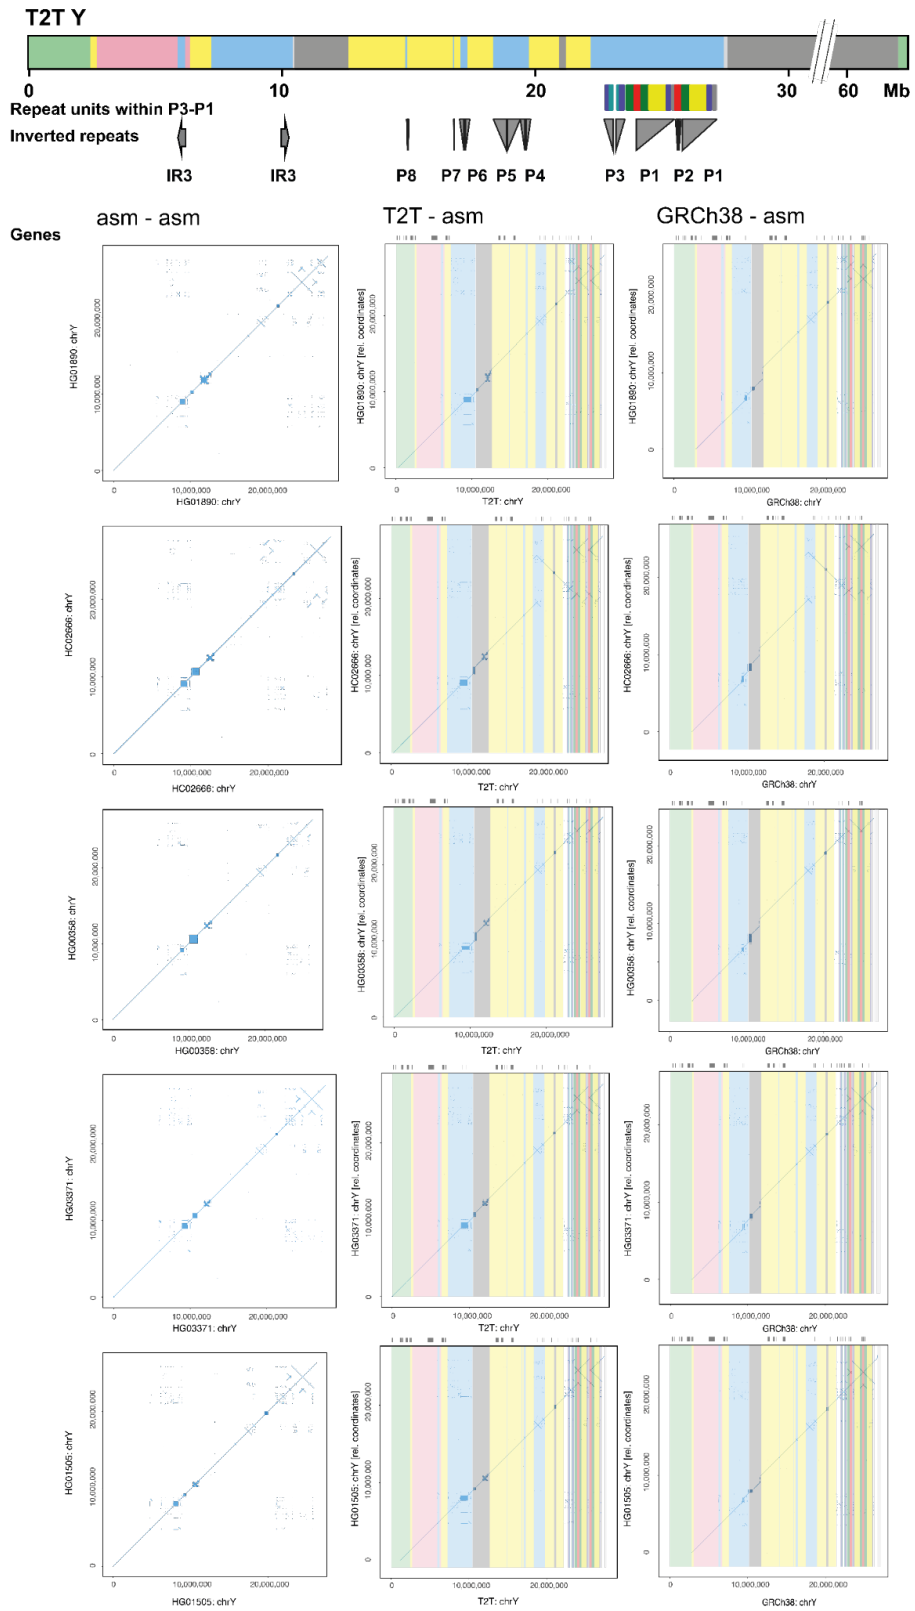

591

592 **Figure S16.** Dotplots of five samples contiguously assembled across the euchromatic regions (from PAR1 until  
593 Yq12 heterochromatic region) with self dotplot on the left, compared to T2T Y in center and to GRCh38 on the  
594 right, annotated with sequence classes and SD repeat units in ampliconic 7 region.

595

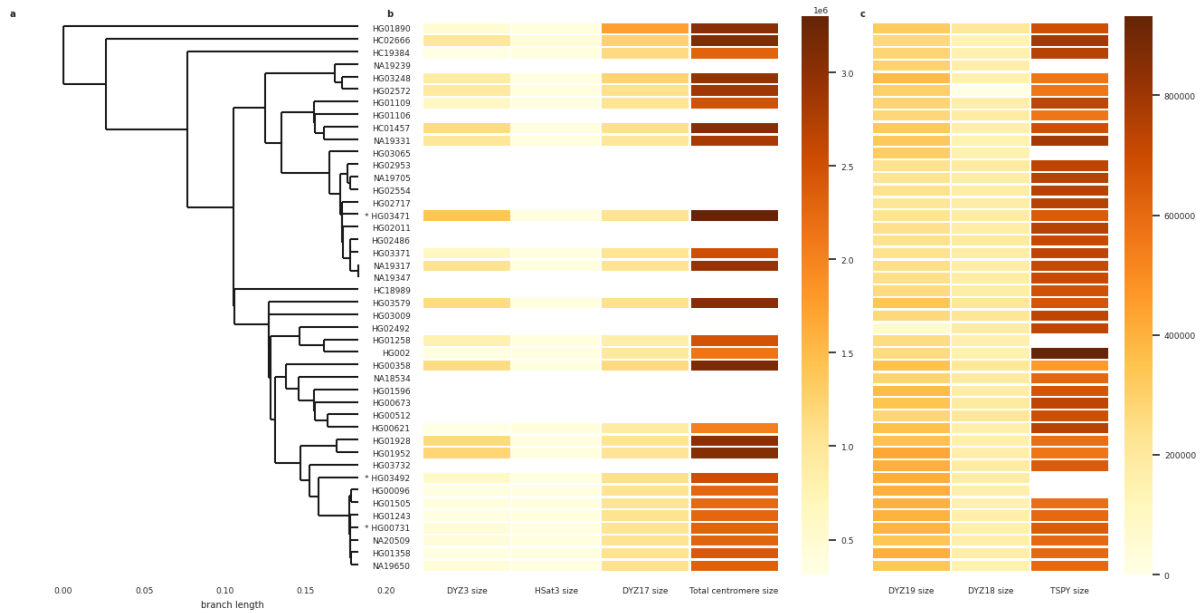

596

597 **Figure S17.** Size variation of the (peri-)centromeric region and repeat arrays (*DYZ3* alpha-satellite array, *Hsat3*,  
598 *DYZ17* array, and total (peri-)centromeric region) on the left and the *DYZ19*, *DYZ18*, and the TSPY copy-number  
599 variable repeat arrays on the right, with sizes shown as a heatmap. **a.** Phylogenetic clustering of the samples, as  
600 described in **Fig. S1**. **b.** Size variation heatmap for each pericentromeric region, and the total centromere size in  
601 millions of base pairs. White fill indicates that the size information of the region is not available due to non-  
602 contiguous assembly of the region. Asterisk to the left of the sample name indicates samples (HG00731,  
603 HG03471, and HG03492) with one assembly gap in the (peri-)centromeric region. **c.** Size variation heatmap for  
604 *DYZ19*, *DYZ18* and TSPY repeat arrays. The sizes of the (peri-)centromeric regions (*DYZ3* alpha-satellite array,  
605 *Hsat3*, and *DYZ17* array) were regressed against each other, but none achieved significant correlations.  
606



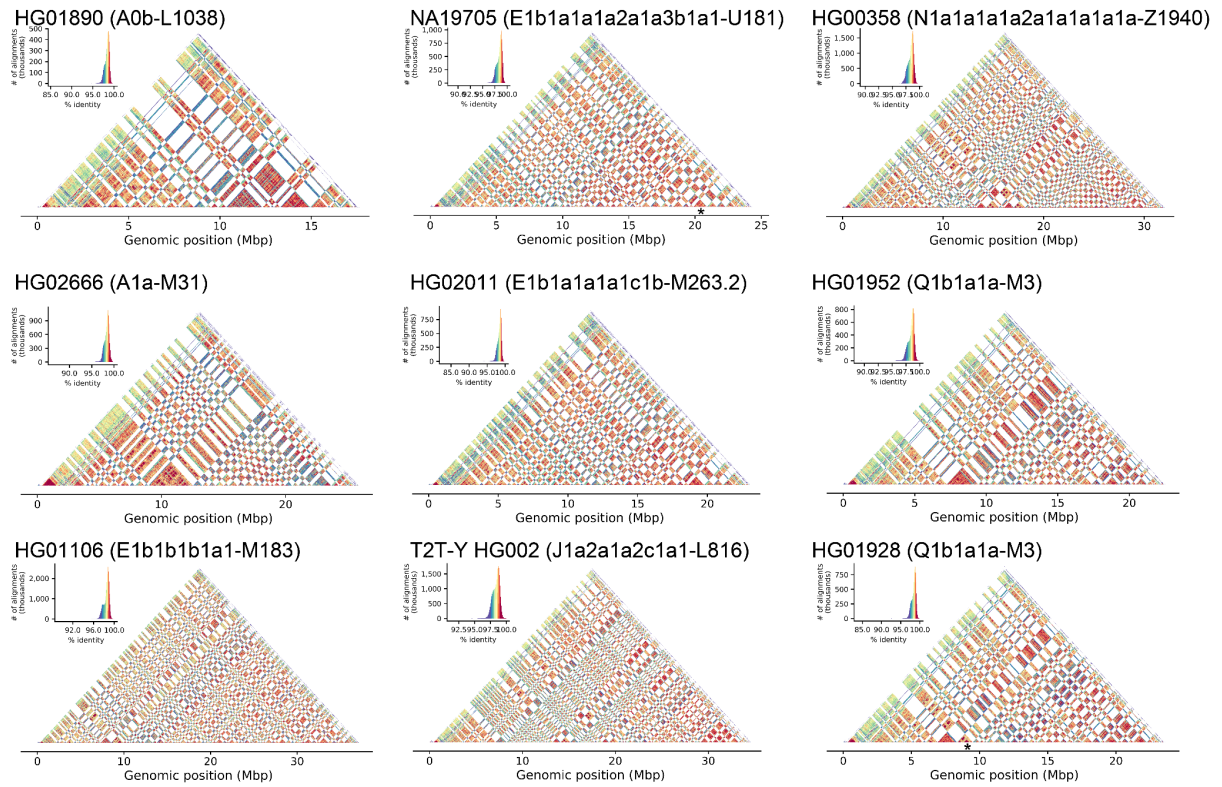

607

608 **Figure S18.** Sequence identity heatmaps of the Yq12 subregion for six contiguously assembled samples  
 609 (HG01890, HG02666, HG01106, HG02011, HG00358 and HG01952), two samples (NA19705 and HG01928)  
 610 with a single gap in the Yq12 subregion (gap location marked with asterisk) and the T2T Y from HG002 using  
 611 5kb window size.

612

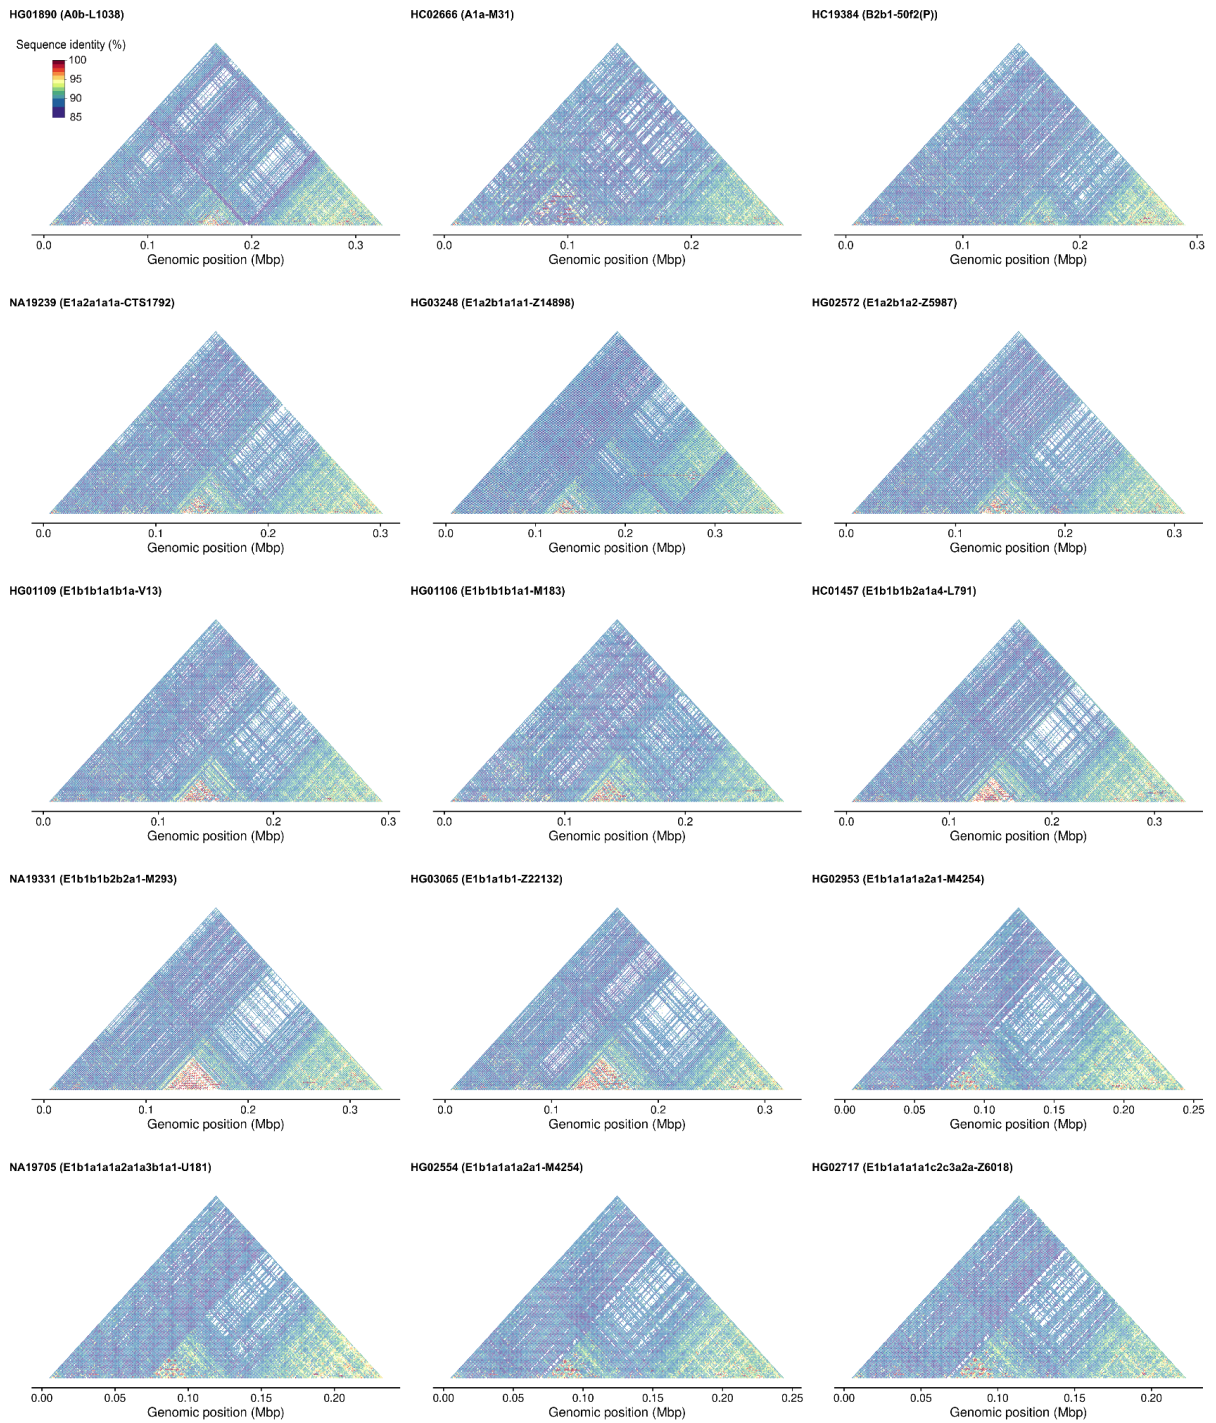

613

614 **Figure S19.** Sequence identity heatmaps of the *DYZ19* subregion across samples, including the T2T Y, in  
 615 phylogenetic order. 5000 bp of flanking sequence was added to the *DYZ19* genomic interval and 1 kbp window  
 616 size was used when running StainedGlass.

617

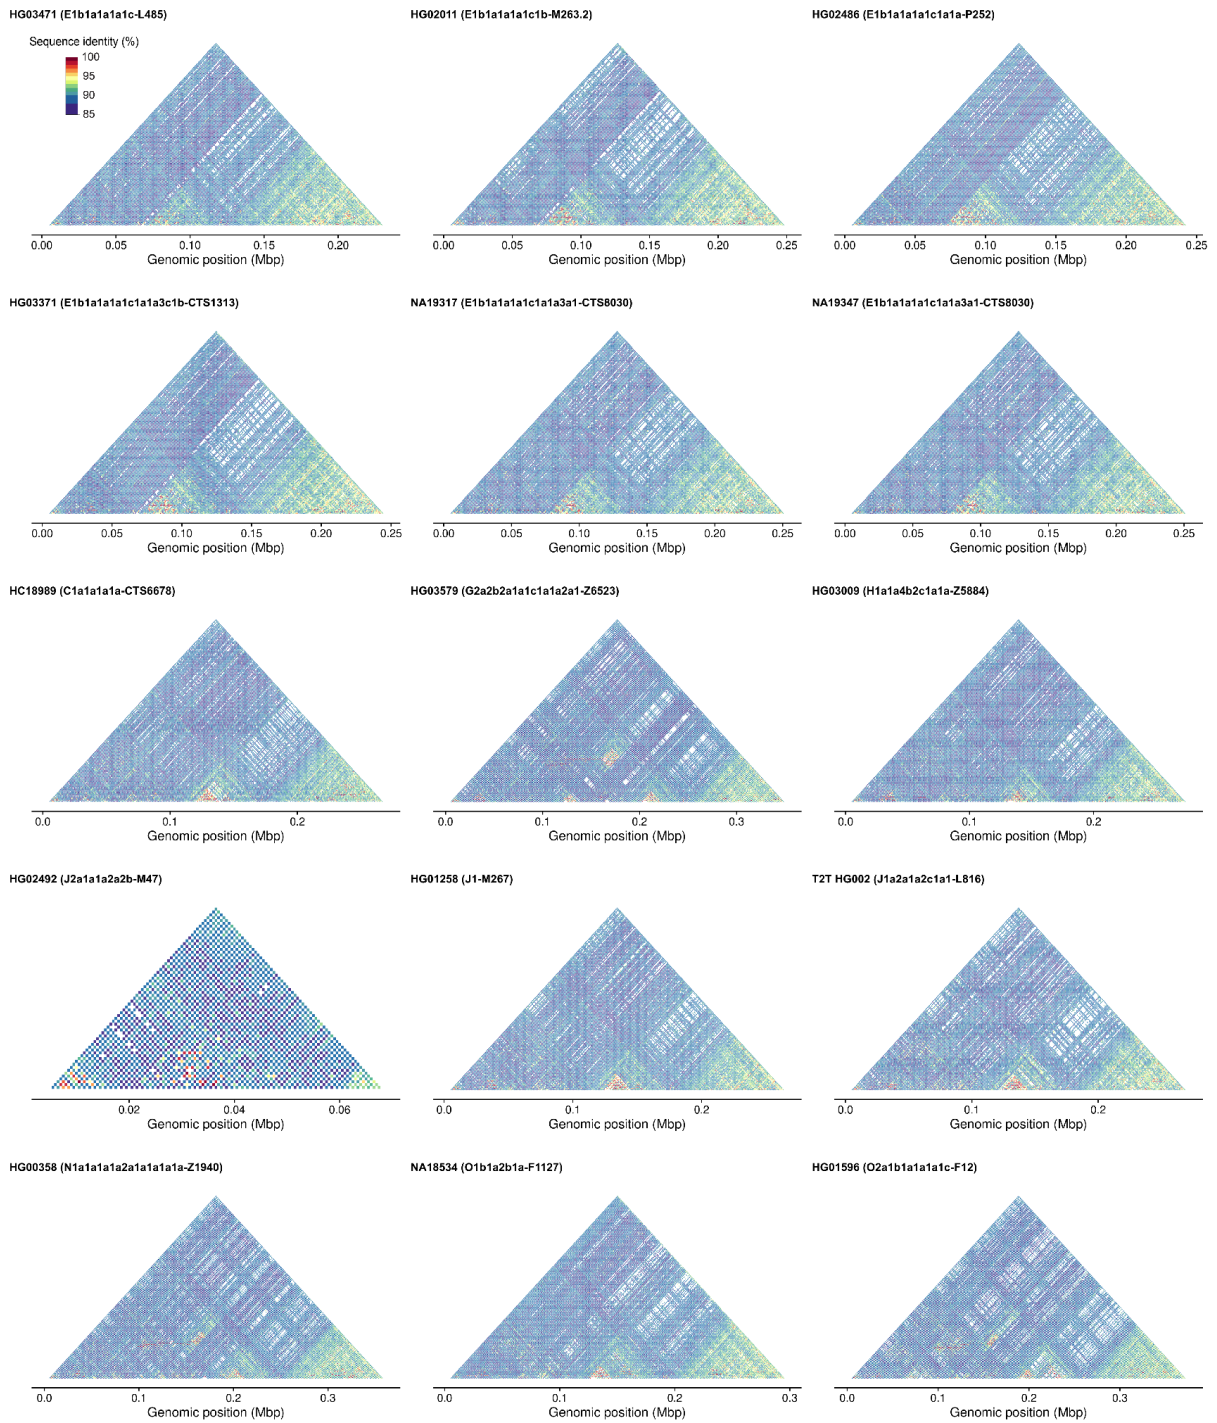

618

619

620

621

622

**Figure S20.** Sequence identity heatmaps of the *DYZ19* subregion across samples, including the T2T Y, in phylogenetic order. 5000 bp of flanking sequence was added to the *DYZ19* genomic interval and 1 kbp window size was used when running StainedGlass.

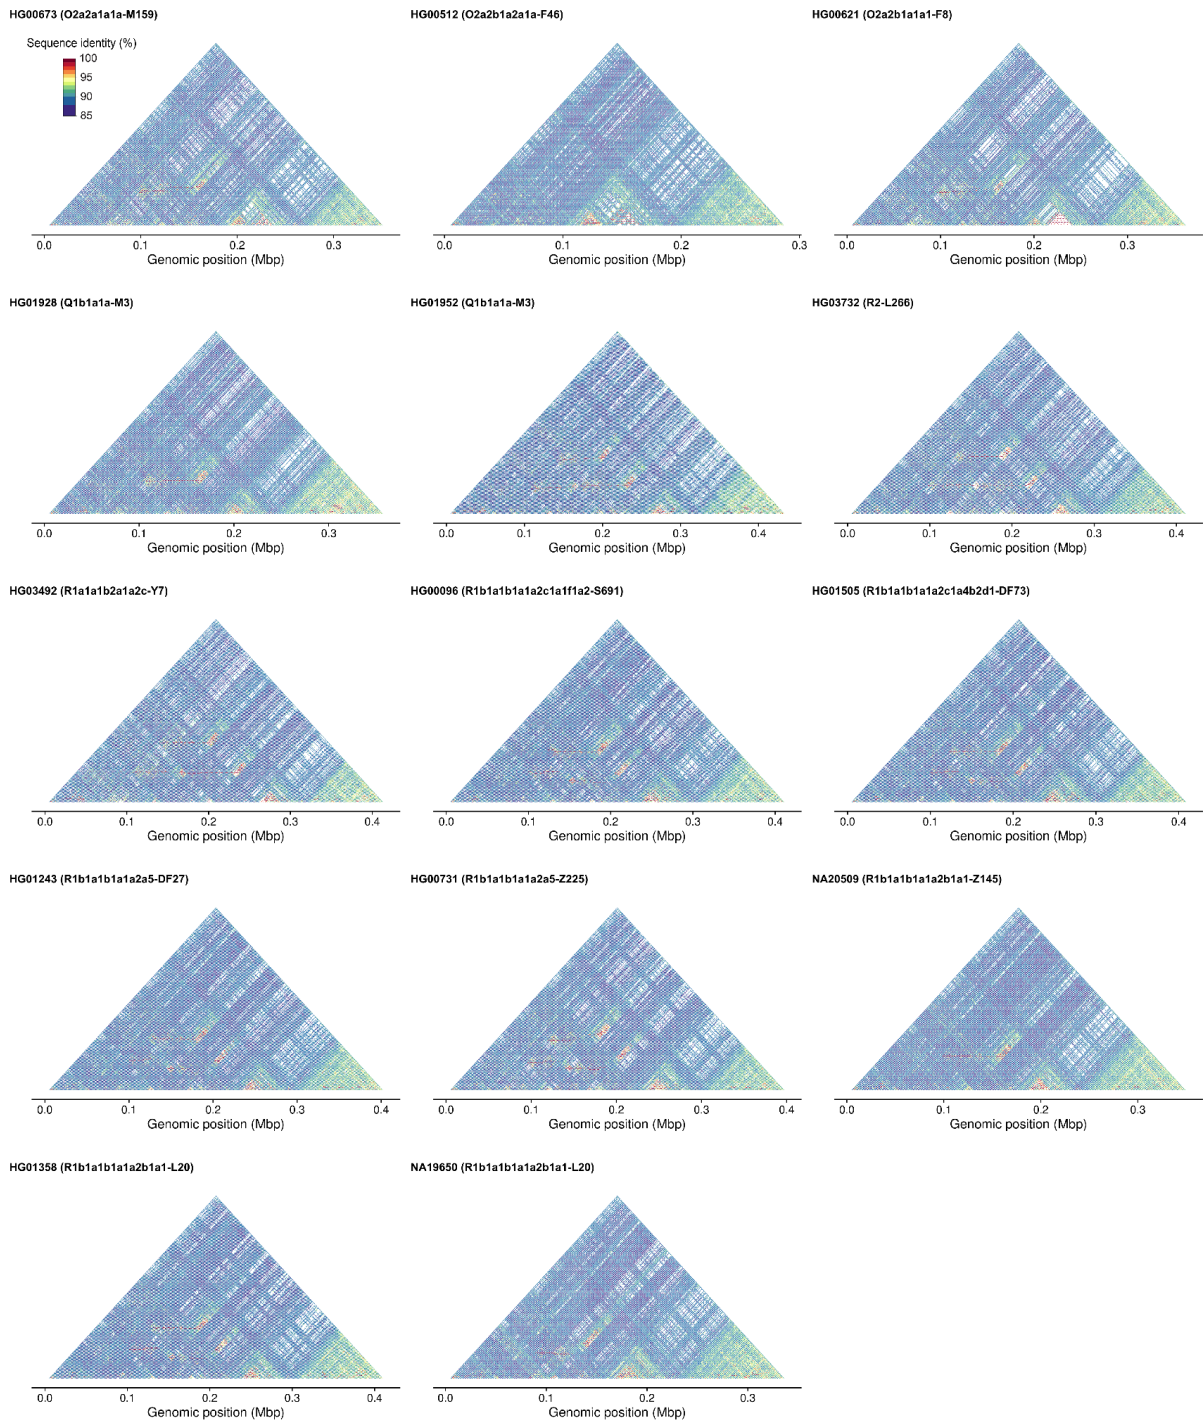

623

624 **Figure S21.** Sequence identity heatmaps of the *DYZ19* subregion across samples, including the T2T Y, in  
 625 phylogenetic order. 5000 bp of flanking sequence was added to the *DYZ19* genomic interval and 1 kbp window  
 626 size was used when running StainedGlass.

627

628  
629

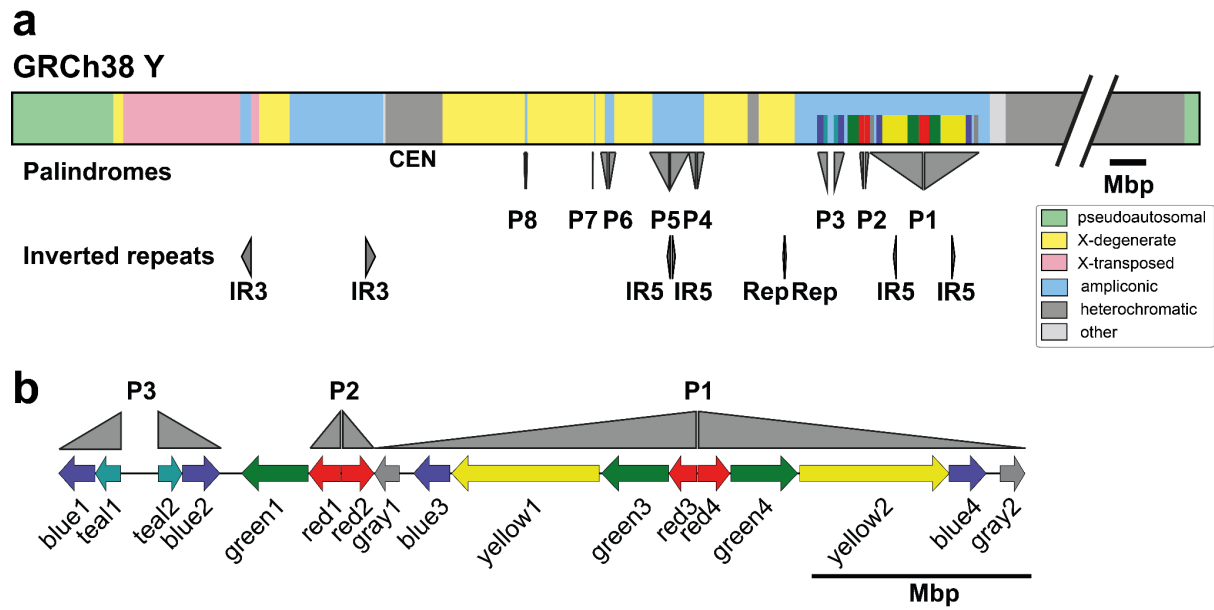

630

631 **Figure S22.** Schematic representation of inverted repeats involved in inversions. **a.** The GRCh38 Y reference  
632 structure with annotations of segmental duplications in *AZFc*/ampliconic subregion 7, with palindromes (P8-P1)  
633 and inverted repeats (IR) shown below. The repeat coordinates relative to GRCh38 Y reference sequence were  
634 obtained from Teitz et al <sup>7</sup>. **b.** Annotation of segmental duplications in *AZFc*/ampliconic subregion 7 following  
635 the naming originally proposed by Kuroda-Kawaguchi et al <sup>29</sup>.

636

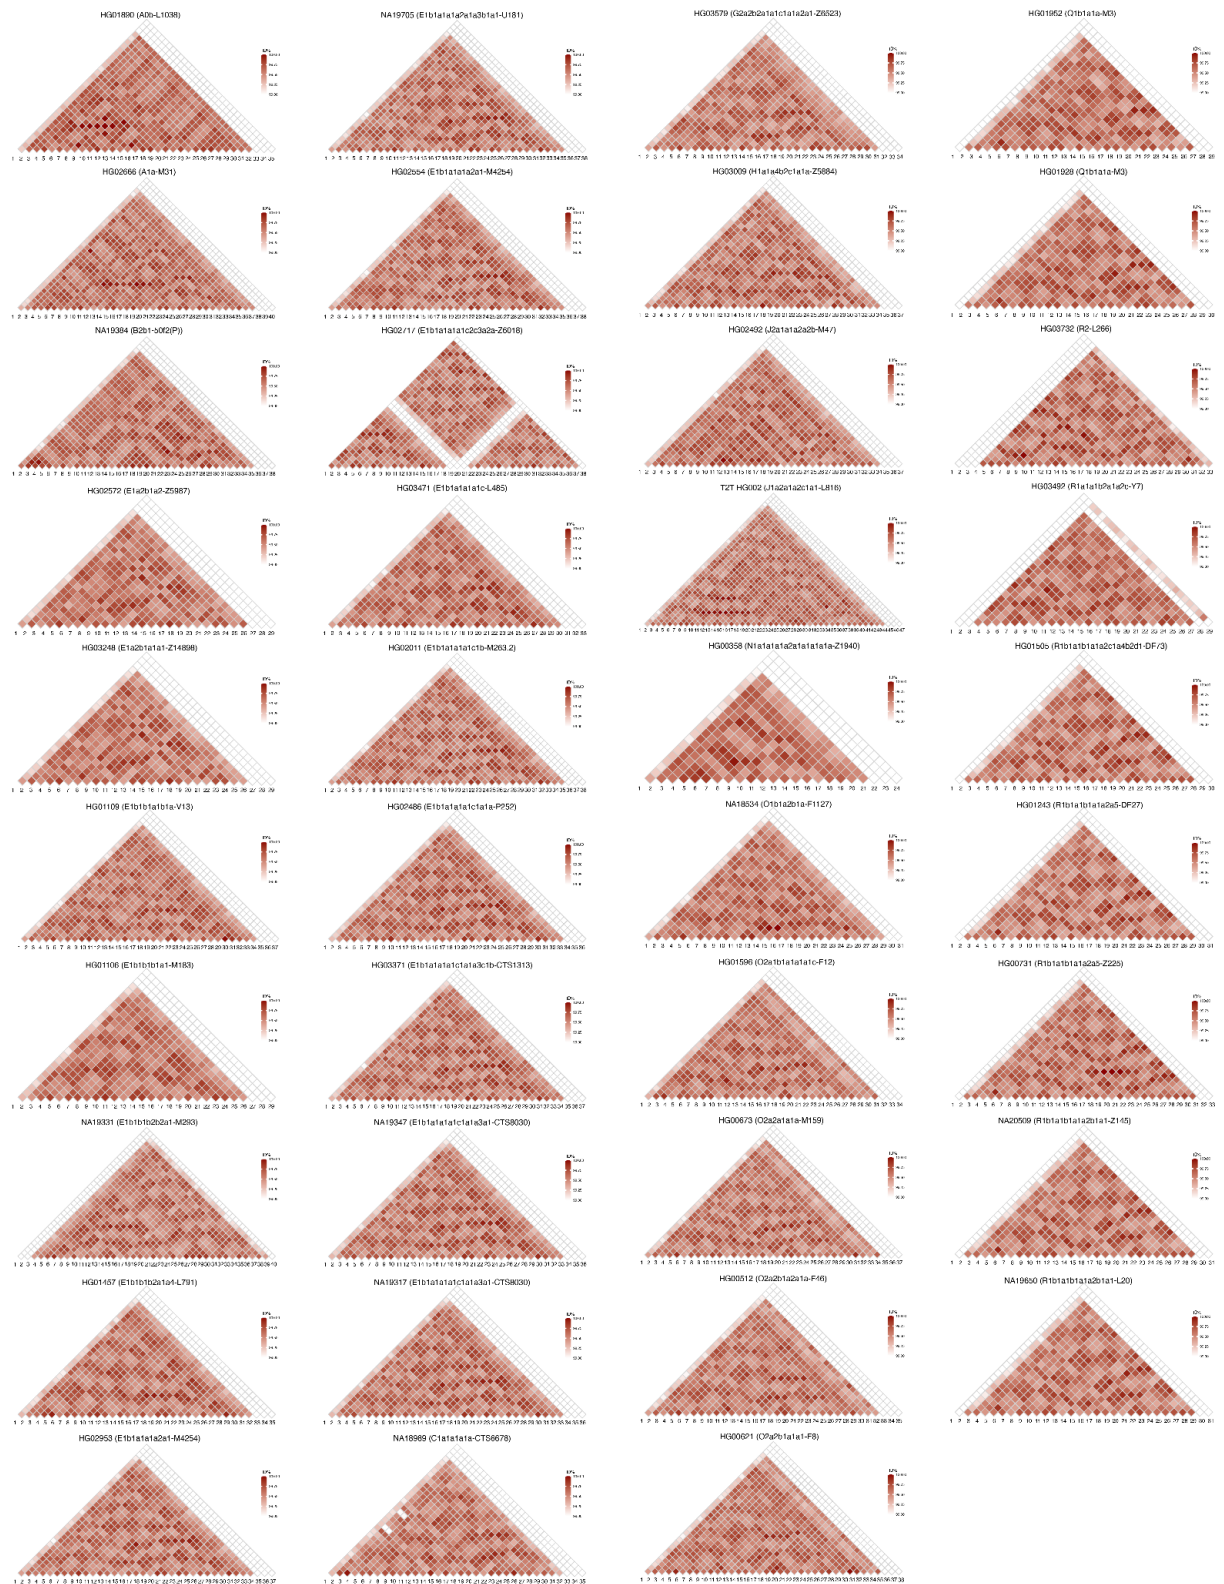

637  
638  
639  
640

**Figure S23.** Sequence identity heatmaps of ~20.3-kbp long TSPY repeat units for 39 males in phylogenetic order (from top to down from the deepest-rooting sample). Red shades from lighter to darker indicate sequence identity from 99-100%, respectively, while white fill indicates sequence identity below 99%.

641

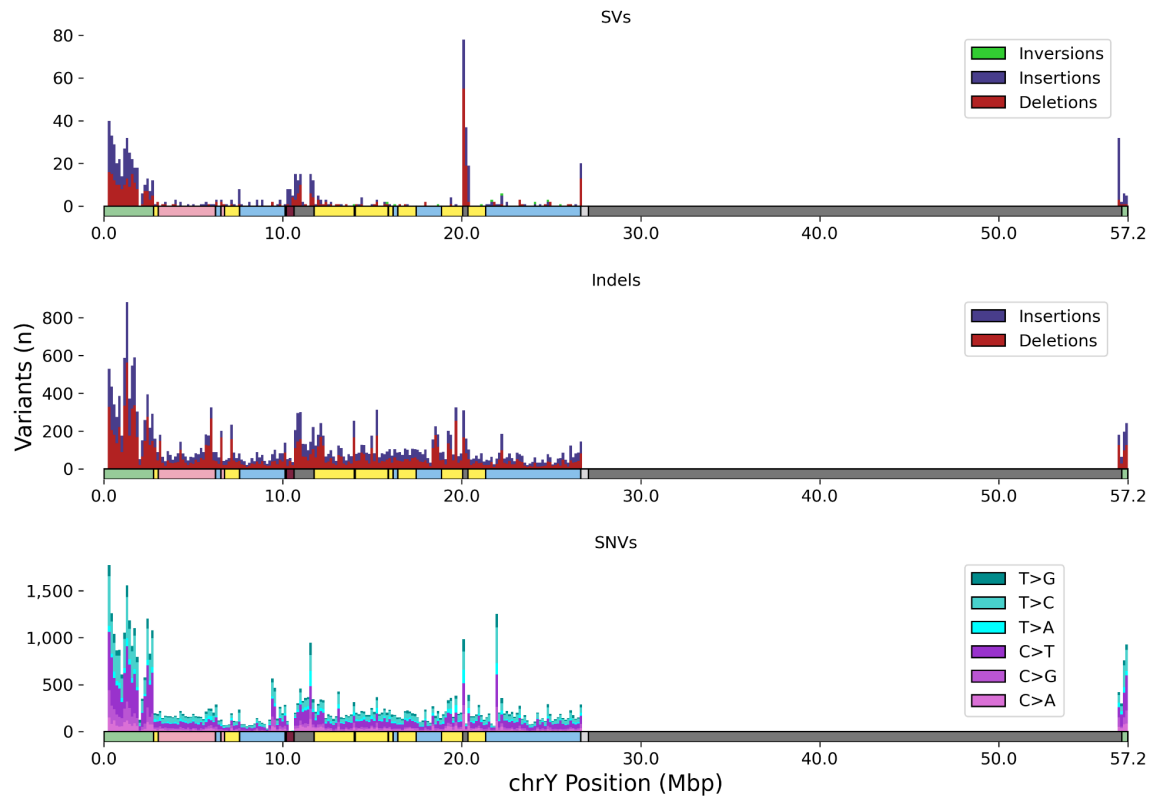

642

643 **Figure S24.** Distribution of variant sizes for SVs ( $\geq 50$  bp, top), Indels ( $< 50$  bp, middle), and SNV (bottom)  
644 across the Y chromosome (color by region) as identified using PAV. High peaks in heterochromatin are apparent  
645 for SVs, but not SNVs and indels.

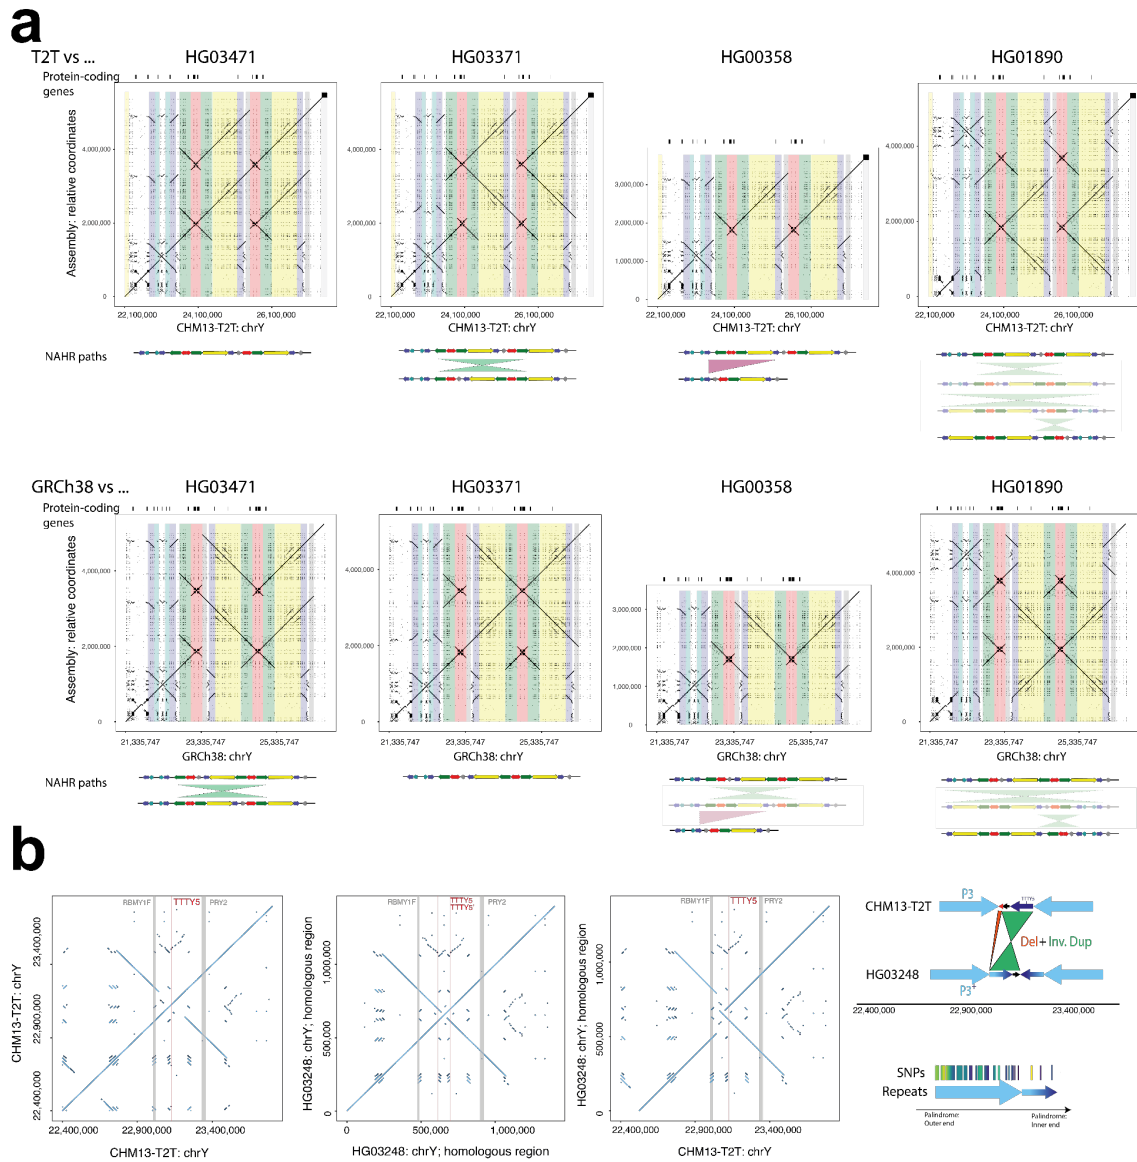

646

647 **Figure S25.** Examples of structural variation identified in the *de novo* assembled Y chromosomes. **a.** Inversions  
 648 identified in the *AZFc*/ampliconic 7 subregion. Top - comparison between the T2T Y and the *de novo* assemblies,  
 649 bottom - GRCh38 Y and the *de novo* assemblies. Potential NAHR path is shown below the dotplot. **b.** Inverted  
 650 duplication affecting roughly two thirds of the 161 kbp unique ‘spacer’ sequence in the P3 palindrome, spawning  
 651 a second copy of the TTTY5 gene and elongating the LCRs in this region. A detailed sequence view reveals a  
 652 high sequence similarity between the duplication and its template and its placement in Y phylogeny supports  
 653 emergence of this variant in the common ancestor of haplogroup E1a2 carried by NA19239, HG03248 and  
 654 HG02572 (**Fig. 3a**).

655



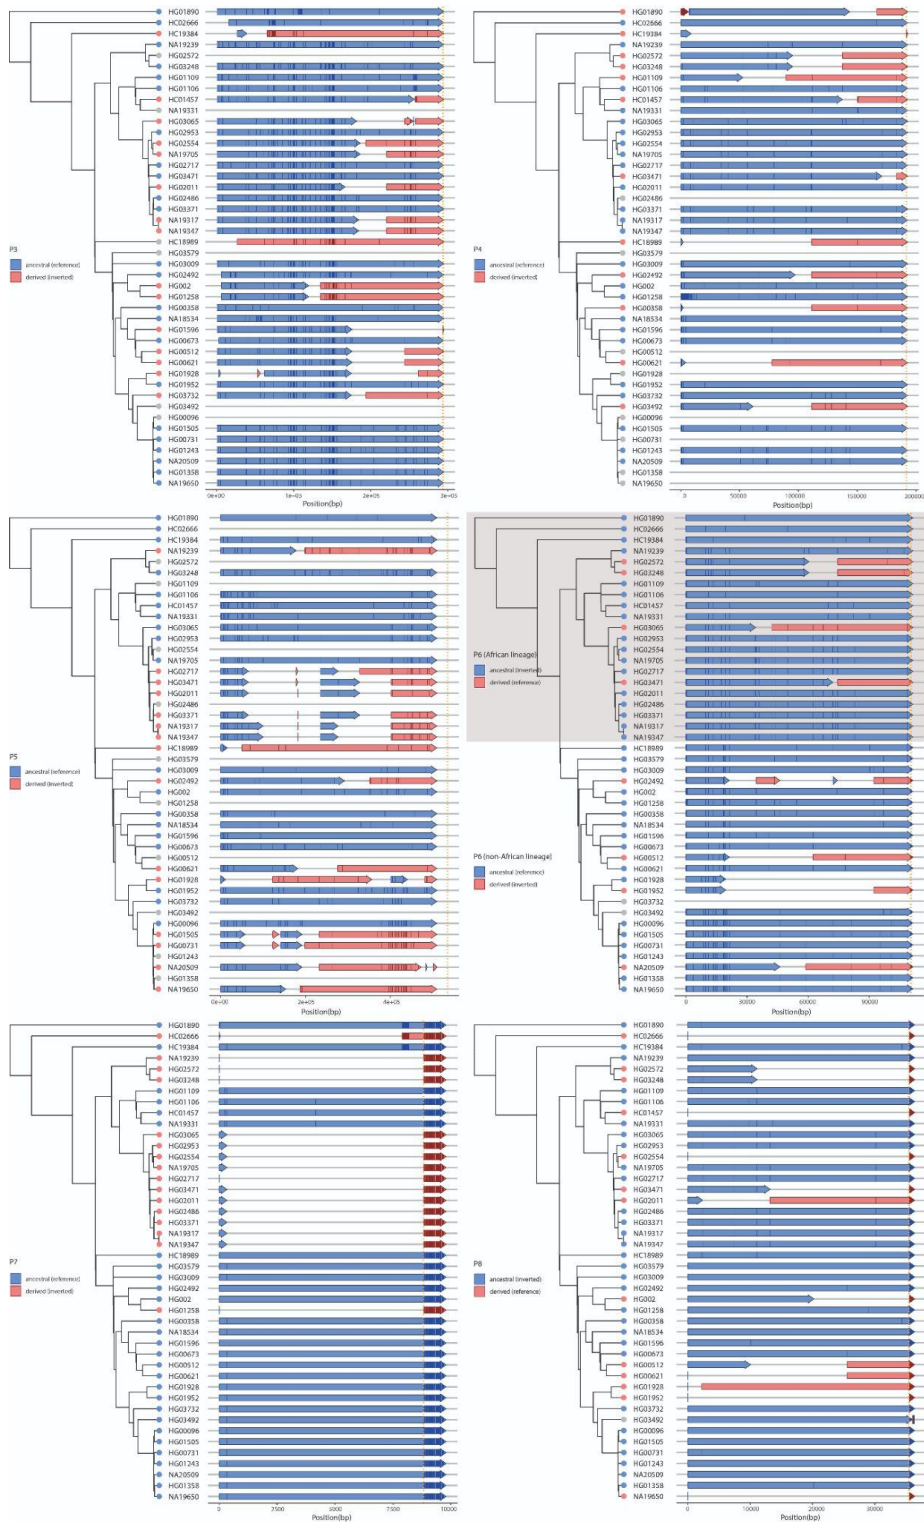

656

657  
658  
659  
660  
661  
662  
663  
664

**Figure S26.** Breakpoint locations identified for 6 euchromatic inversions in palindromes P3, P4, P5, P6, P7 and P8. The red tip colors in the phylogenetic tree indicate samples which have undergone an inversion and therefore carry the 'spacer' region in inverted orientation compared to samples with blue tip (ancestral state). Informative PSV positions are shown as vertical lines with darker color in each of the arrows. The orange dotted line indicates the start of the unique 'spacer' region. Any information that is not available is indicated by gray. In P6, breakpoint locations were determined separately for African Y lineages (haplogroups A, B and E, gray shaded area) and non-African Y lineages, using two different sets of ancestral and derived states.

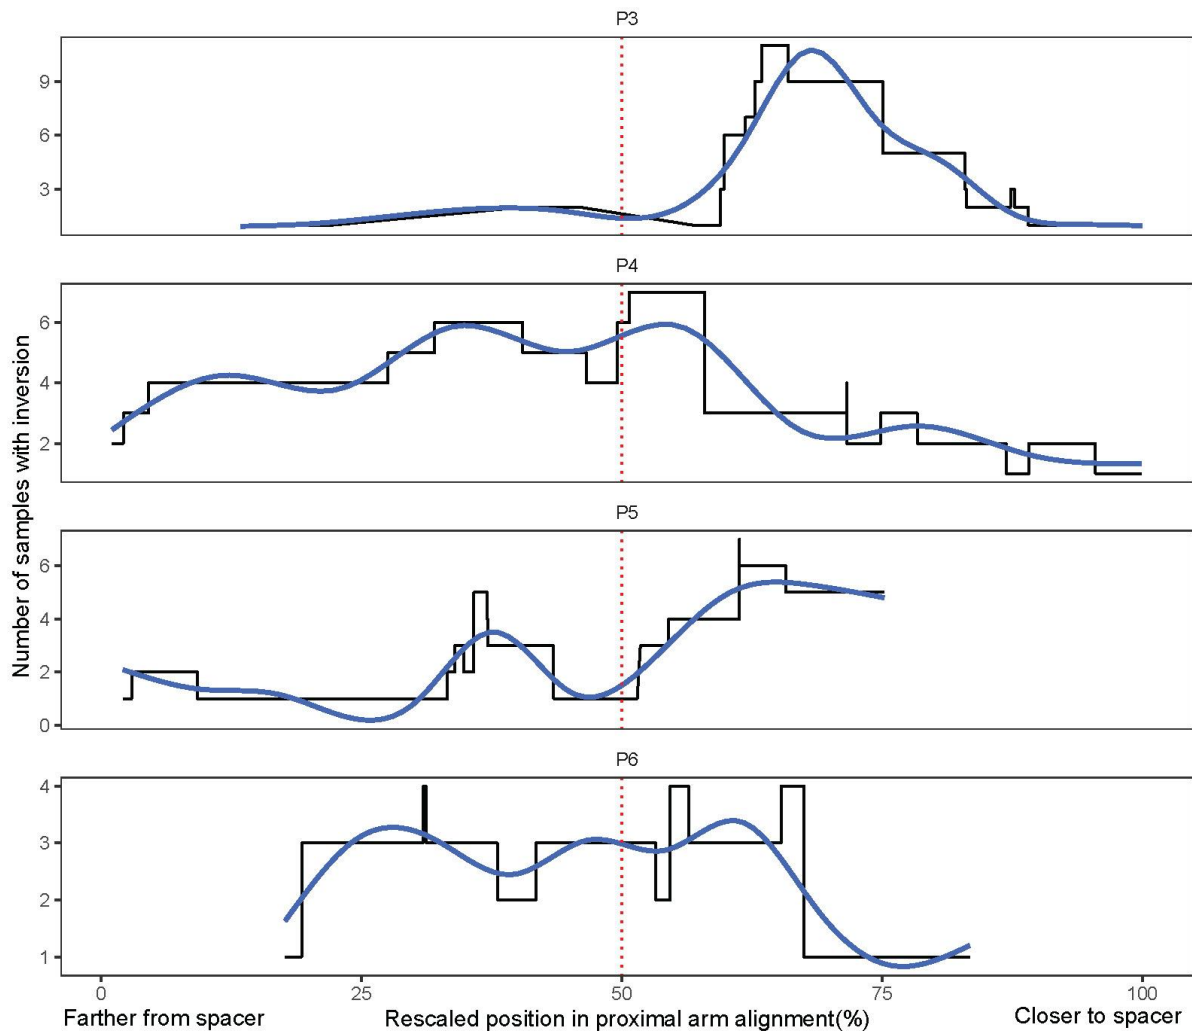

665

666

667

668

669

670

671

672

**Figure S27.** Rescaled breakpoint locations identified for 4 euchromatic inversions in palindromes P3, P4, P5, and P6. The start and end positions of each breakpoint range were rescaled to have the same start (0%) and end position (100%) across 4 palindromes. The y-axis indicates the number of samples that have inversion breakpoints at the corresponding position in the x-axis. The trend line indicated in blue is displayed by a smoothing function implemented in ggplot2 (geom\_smooth, method = "gam"). P7 and P8 were excluded due to the small number of informative PSVs and therefore, wide breakpoint ranges.

673

| Distance between neighbouring PSVs | 125 | 125 | 37 | 76 | 86 | 84 | 76 | 233 | 193 | 22 | 351 | 105 | 27 | 294 | 2 | 1 | 1 | 1 | 1 | 8 | 35 | 8 |   |   |
|------------------------------------|-----|-----|----|----|----|----|----|-----|-----|----|-----|-----|----|-----|---|---|---|---|---|---|----|---|---|---|
| IR5-1_HG02666                      | G   | A   | G  | G  | A  | A  | G  | C   | G   | -  | T   | A   | T  | C   | C | - | - | - | - | - | -  | T | T | T |
| IR5-2_HG02666                      | T   | G   | A  | A  | G  | G  | A  | T   | A   | C  | T   | G   | G  | C   | C | - | - | - | - | - | -  | T | T | T |
| IR5-3_HG02666                      | G   | A   | G  | A  | A  | A  | G  | C   | G   | -  | T   | G   | G  | A   | T | T | T | T | T | A | T  | C | C | C |
| IR5-4_HG02666                      | T   | G   | A  | A  | G  | G  | A  | T   | A   | C  | T   | G   | G  | A   | T | T | T | T | T | A | T  | C | C | C |
| IR5-1_NA19384                      | G   | A   | G  | G  | A  | A  | G  | C   | G   | -  | T   | A   | T  | C   | C | - | - | - | - | - | -  | T | T | T |
| IR5-2_NA19384                      | G   | A   | G  | G  | A  | A  | G  | C   | G   | -  | T   | A   | T  | C   | C | - | - | - | - | - | -  | T | T | T |
| IR5-3_NA19384                      | T   | G   | A  | A  | G  | G  | A  | T   | A   | C  | C   | G   | G  | A   | T | T | T | T | T | A | T  | C | C | C |
| IR5-4_NA19384                      | T   | G   | A  | A  | G  | G  | A  | T   | A   | C  | T   | G   | G  | A   | T | T | T | T | T | A | T  | C | C | C |
| IR5-1_HG01890                      | G   | A   | G  | G  | A  | A  | G  | C   | G   | -  | T   | A   | T  | C   | C | - | - | - | - | - | -  | T | T | T |
| IR5-2_HG01890                      | G   | A   | G  | G  | A  | A  | G  | C   | G   | -  | T   | A   | T  | C   | C | - | - | - | - | - | -  | T | T | T |
| IR5-3_HG01890                      | T   | G   | A  | A  | G  | G  | A  | T   | A   | C  | T   | G   | G  | C   | T | T | T | T | T | A | T  | C | C | C |
| IR5-4_HG01890                      | T   | G   | A  | A  | G  | G  | A  | T   | A   | -  | T   | G   | G  | A   | T | T | T | T | T | A | T  | C | C | C |

674

675

**Figure S28.** Inversion breakpoint identification for the *IR5/IR5* inversion in HG02666. The alignment shows all 4 IR5 repeats from three samples (HG02666 - inverted, NA19384 and HG01890 - reference orientation), with only informative PSV positions and genotypes shown (i.e., sites identical between the IR5 repeats and across individuals have been removed for visualization purposes). In NA19384 and HG01890 the IR5 repeats located within the P5 palindrome (IR5-1 and IR5-2) show a distinct PSV pattern from the IR5 copies located within the P1 palindrome. HG02666 which carries an inversion, the change of this pattern indicates the location of the inversion breakpoints and is highlighted by a black box. Inversion breakpoints relative to GRCh38 are: chrY:18,036,429-18,036,932 and chrY:24,036,893-24,037,396 for proximal and distal breakpoints, respectively.

683

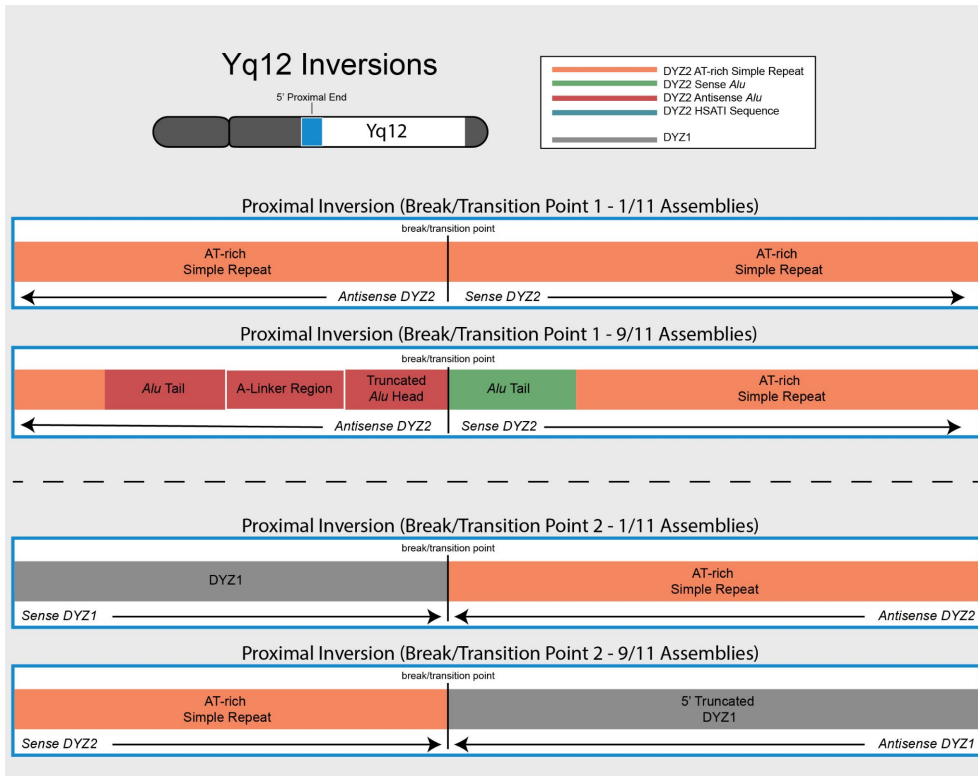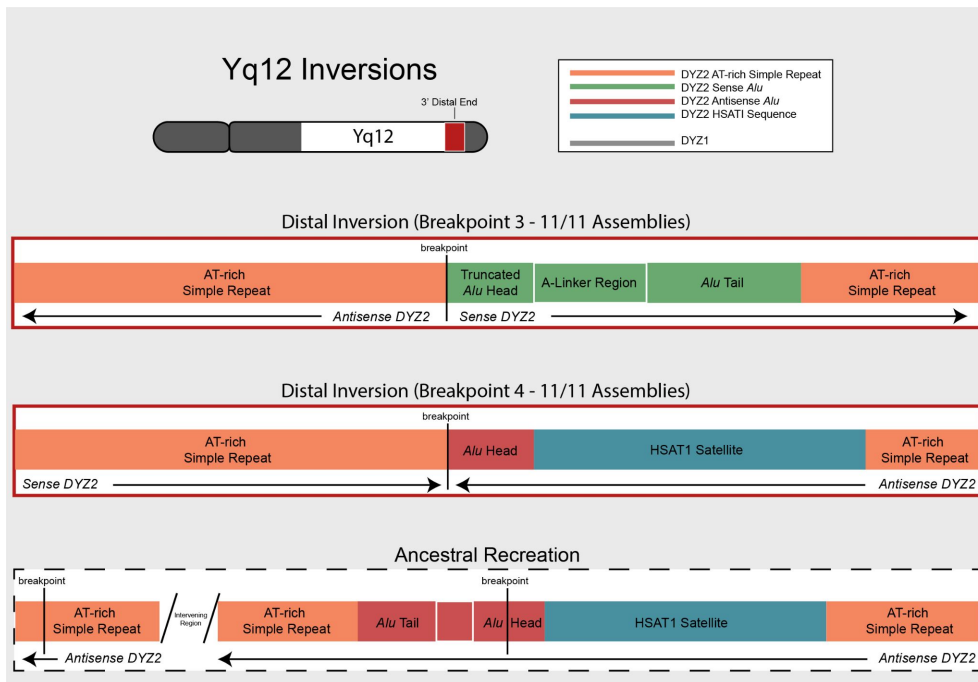

688 **Figure S29.** Inversions identified in the proximal and distal regions of the Yq12 subregion. **a.** Shows the proximal  
 689 inversion break/transition regions. The top two rows show the inversion found in HG01890 and the bottom two  
 690 rows the nine other genomes. The proximal inversion region is deleted in HG01106. The inversion break/transition  
 691 points are described as such since the coordinates for where region changes orientation is located (see **Table S28**),  
 692 but the exact breakpoint has not been elucidated. **b.** Shows the distal inversion breakpoints (top row) shared in all  
 693 genomes, as well as an ancestral recreation of the region before the inversion.

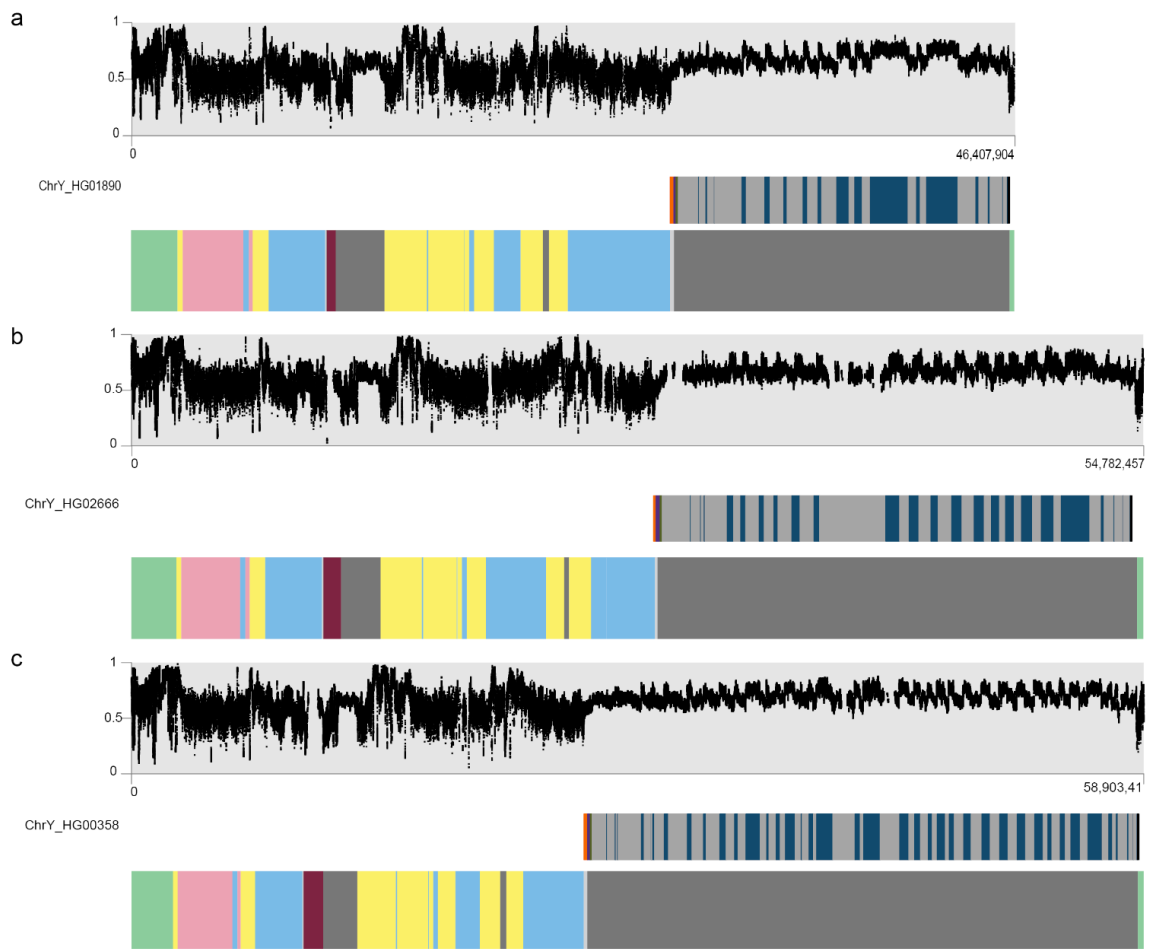

696

697

698

699

700

701

702

**Figure S30.** Methylation patterns as determined from the ONT data across the three contiguously assembled Y chromosomes, with repeat array locations (orange - *DYZ18*, purple - 2.7kb-repeat, green - 3.1kb-repeat, gray - *DYZ1*, blue - *DYZ2*) and Y-chromosomal subregion locations (see **Fig. 1a** for details) shown below as bar plots.

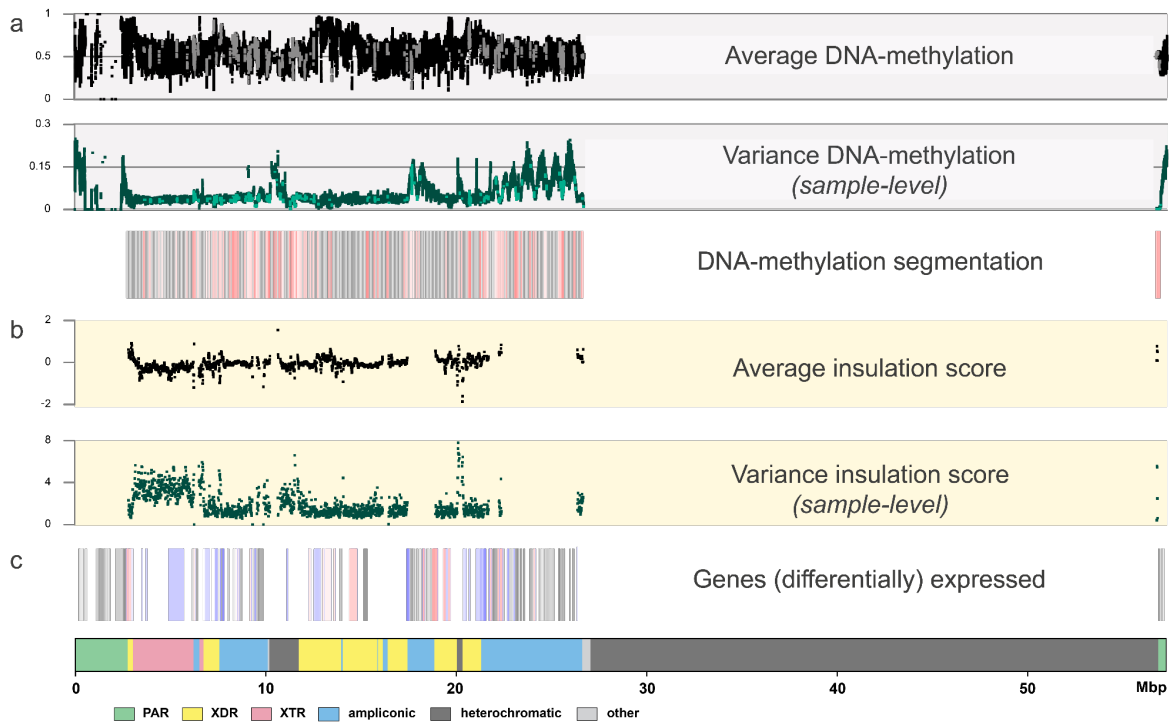

703

704 **Figure S31.** Functional analyses on the Y chromosome with DNA-methylation, RNA expression and HiC  
 705 information as anchored to GRCh38. **a.** The top three panels show DNA-methylation levels and variation over the  
 706 studied chromosomes. In black (top line) the average methylation is shown, in green (middle) the variation in  
 707 DNA-methylation levels across the studied genomes. The bottom boxes represent the DNA methylation  
 708 segmentation using PycoMeth-seg. In gray shades 2,861 methylation segments, and in red shades the 340  
 709 significantly differentially methylated segments (DMS). The CpG sites that fall in a DMS are colored in a lighter  
 710 shade in the top two panels. **b.** Two panels showing average insulation scores (top) and variance of insulation  
 711 scores between any two samples (bottom) across 40 samples with Hi-C data with 10 kbp resolution. Regions with  
 712 lower insulation scores are more insulated and more likely to be TAD boundaries, while regions with higher scores  
 713 are most likely to stay inside TADs. **c.** The Geuvadis based gene-expression analysis, shown are the 205 genes on  
 714 Y chromosome (gray shades), the 64 genes expressed in the Geuvadis LCLs (blue shades), of which 22 are  
 715 differentially expressed (red shades).

716

717

718

719

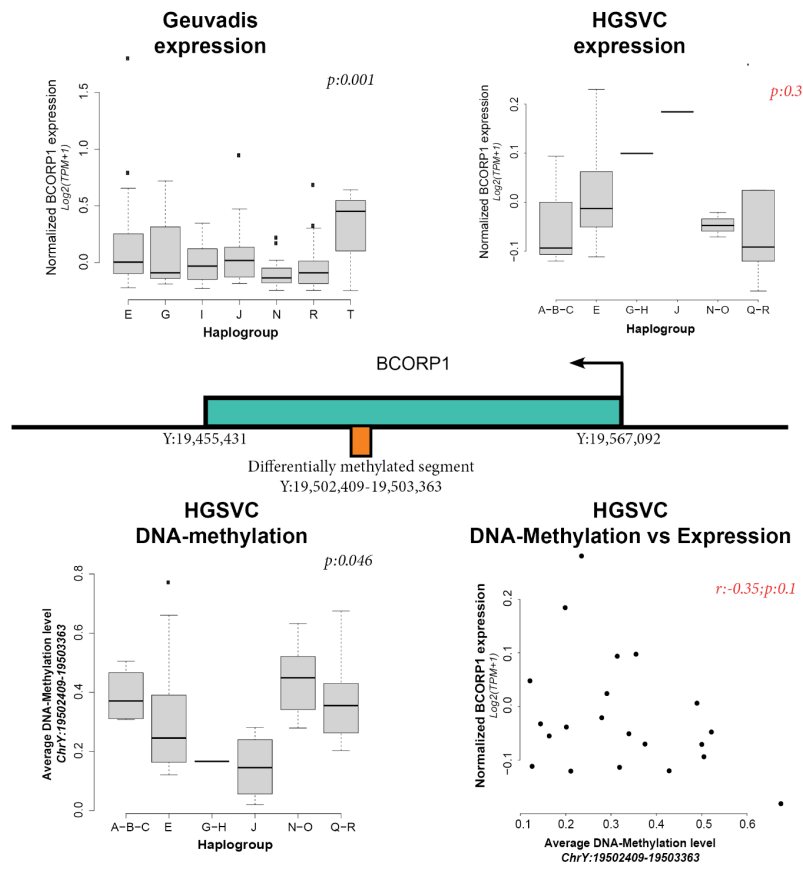

720

721 **Figure S32.** Schematic representation of the *BCORP1* gene and the effects of the haplogroup on gene expression  
 722 and DNA-methylation (DNAm) levels. In the center an illustration of the *BCORP1* (in green), in the center of  
 723 the gene a differentially DNAm segment is identified (in orange). The differential DNAm effect identified in  
 724 the HGSVC samples is plotted in the bottom left boxplot. The *BCORP1* is found to be differentially expressed in  
 725 the Geuvadis samples (top left boxplot). The expression effect is suggestive in the 21 HGSVC samples, expression  
 726 of haplogroup E is on average higher than haplogroups G,H,J,N,O,Q,R. The expression effect of the haplogroup  
 727 is inversely related to the DNA-methylation effect in this segment (Pearson R -0.35), with a suggestive P value of  
 728 0.1 indicating the relation in this small sample set.

729

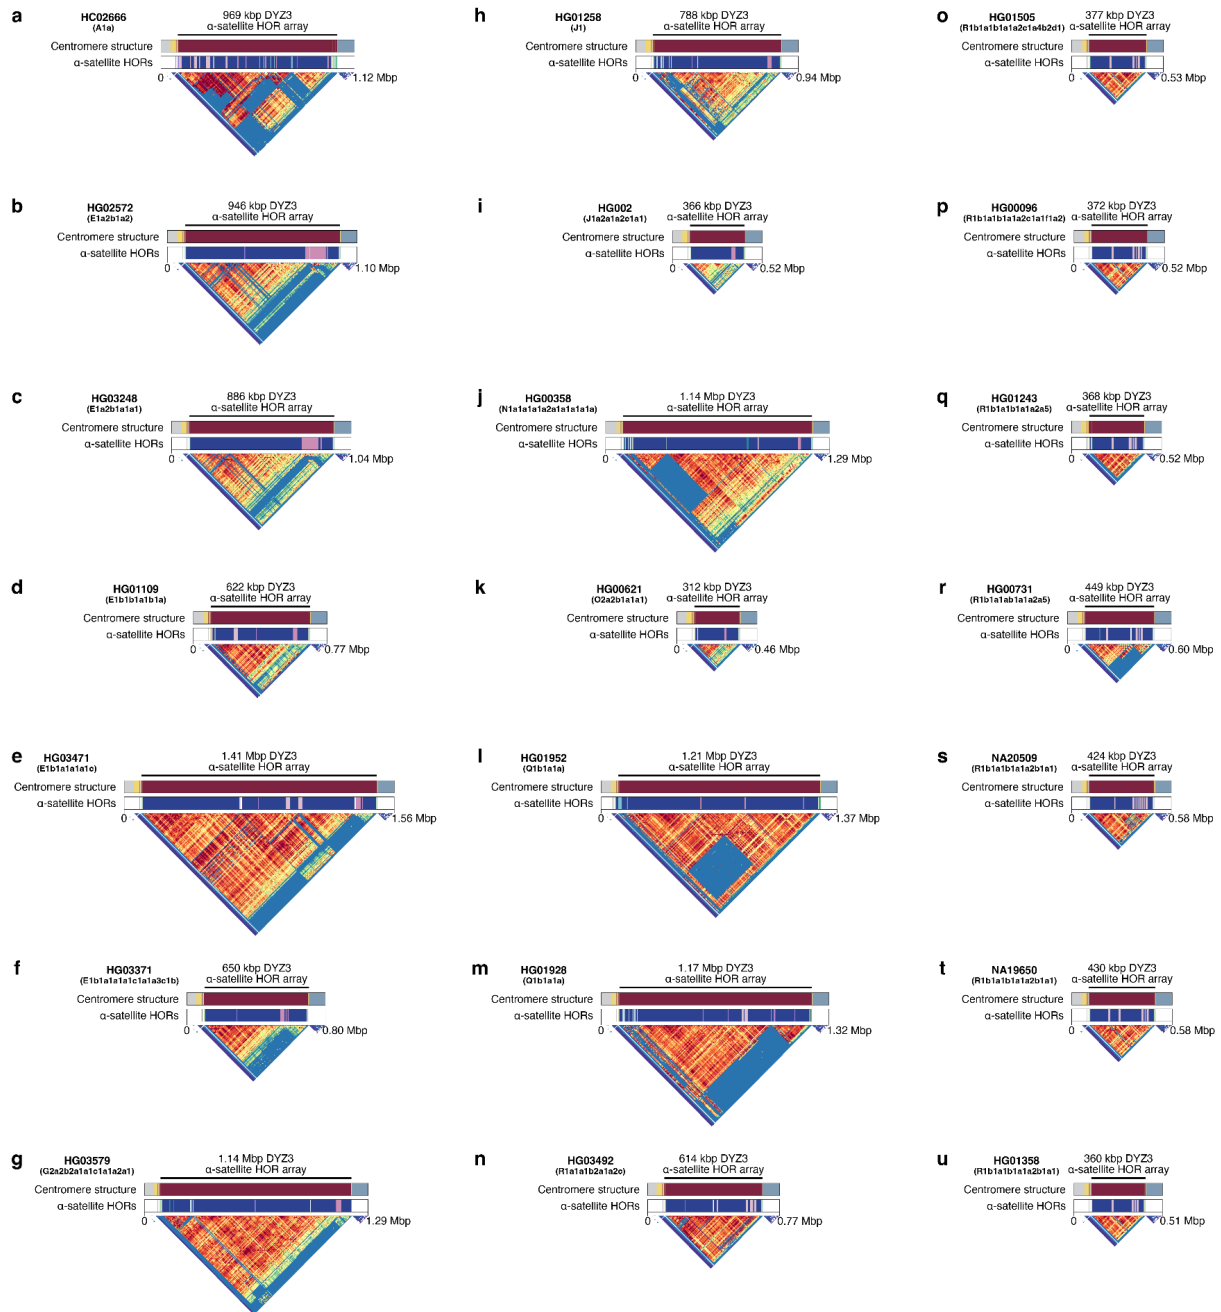

730

731 **Figure S33.** Organization of the chromosome Y centromeric region from 21 genomes representing all major  
 732 superpopulations. The structure (top),  $\alpha$ -satellite HOR organization (middle), and sequence identity heat map  
 733 (bottom) for each centromere is shown and reveals the presence of novel HORs in over half of the centromeres.  
 734 Note - the sizes of the *DYZ3*  $\alpha$ -satellite array are shown on top as determined using RepeatMasker (**Methods**).  
 735 The centromeres are ordered phylogenetically from the deepest-rooting sample, panel **a** to **u**.

736



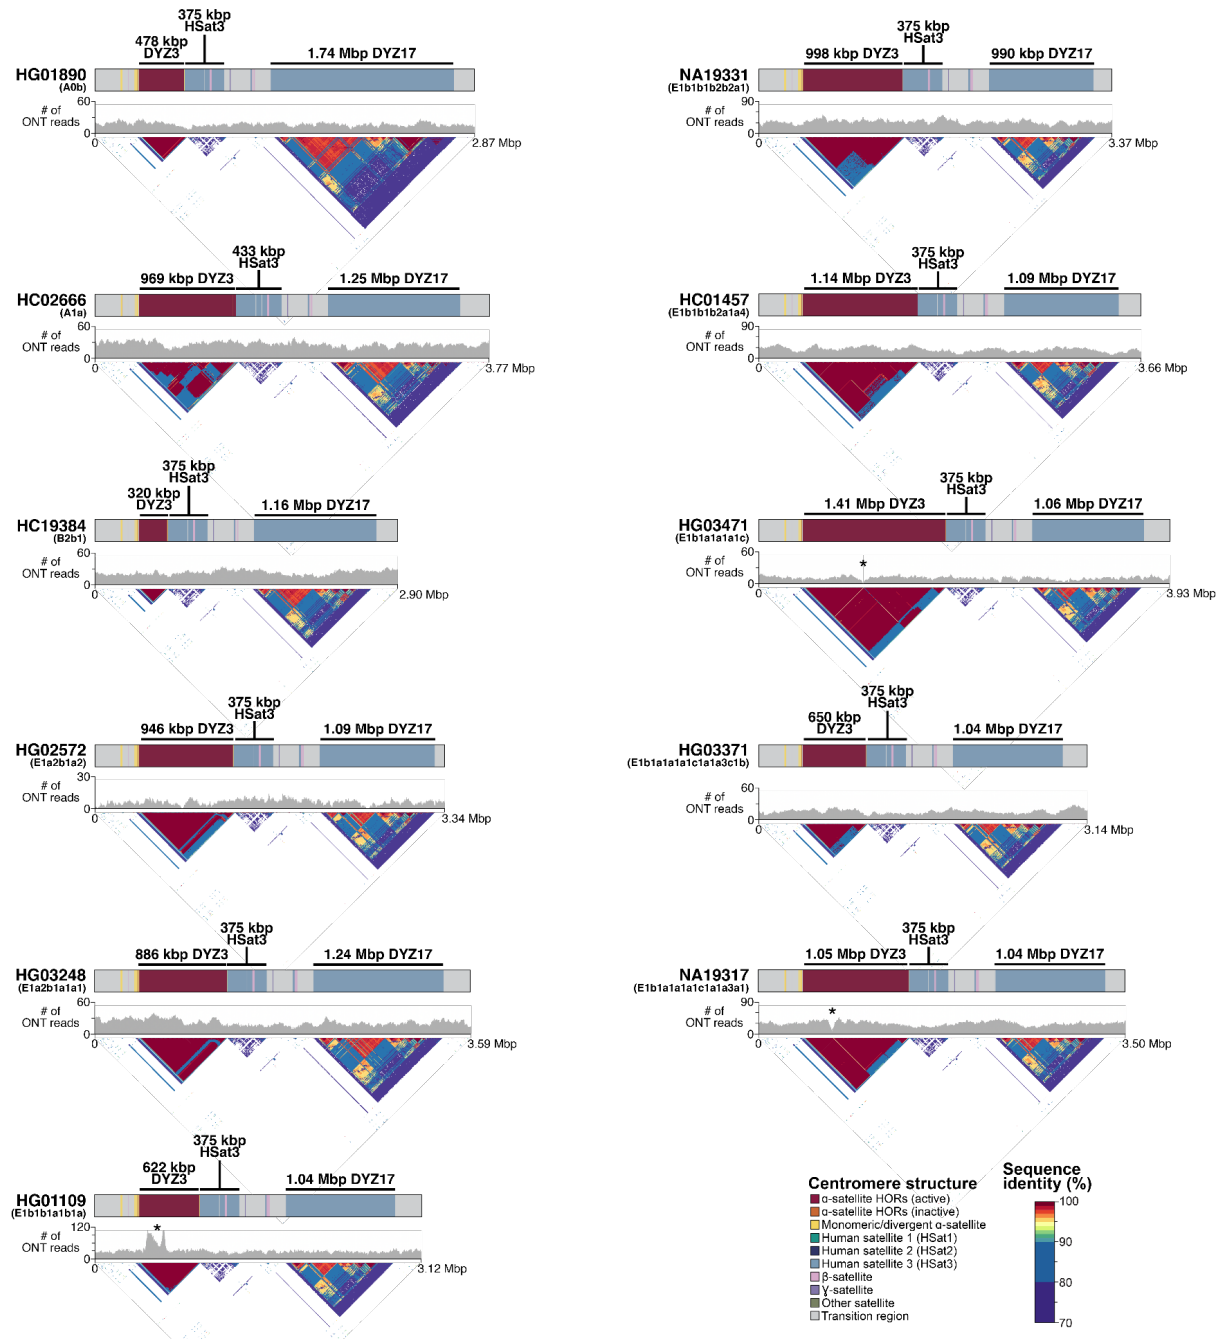

737

738 **Figure S34.** Genetic landscape of the Y-chromosomal pericentromeric region from samples carrying African Y  
 739 lineages. The top panel shows locations and composition of the pericentromeric region with repeat array sizes  
 740 shown for each Y chromosome (the *DYZ3*  $\alpha$ -satellite array size as determined using RepeatMasker, **Methods**).  
 741 The middle panel shows (UL-)ONT read depth and bottom sequence sequence identity head maps generated using  
 742 StainedGlass pipeline (using 5-kb window size). Asterisks indicate two samples (HG01109 and NA19317) with  
 743 a possible assembly collapse/error, and one sample (HG03471) with a single gap in the *DYZ3* array.

744

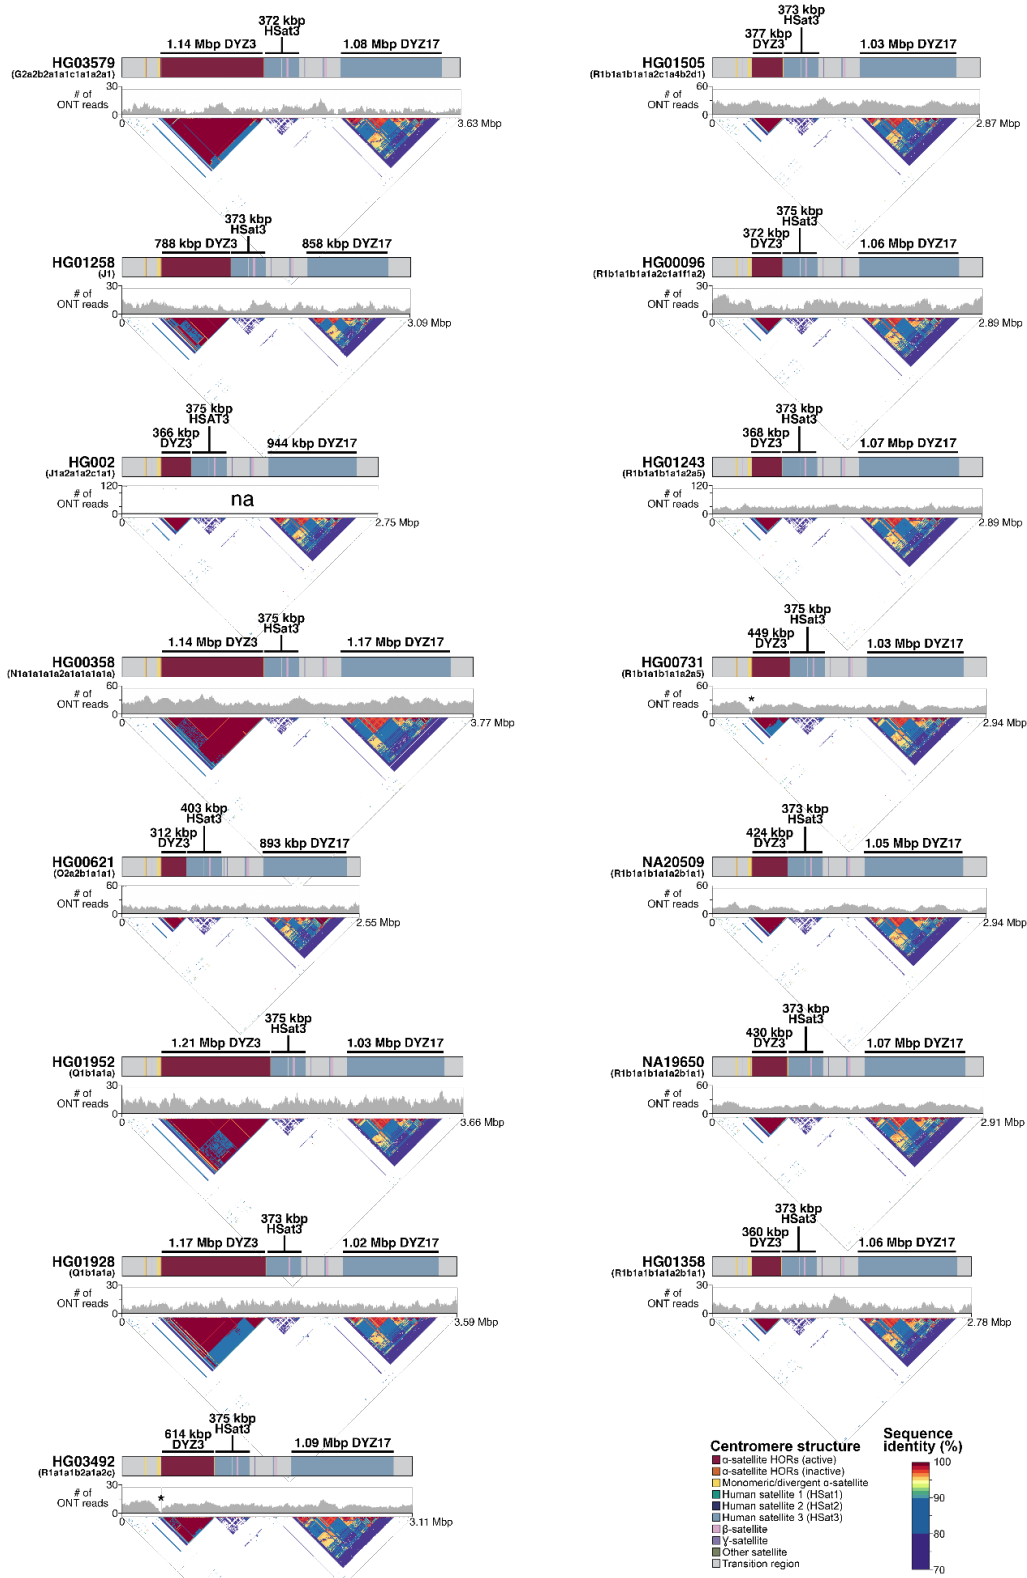

745

746 **Figure S35.** Genetic landscape of the Y-chromosomal pericentromeric region from samples carrying non-African  
 747 Y lineages. The top panel shows locations and composition of the pericentromeric region with repeat array sizes  
 748 shown for each Y chromosome (the *DYZ3*  $\alpha$ -satellite array size as determined using RepeatMasker, **Methods**).  
 749 The middle panel shows (UL-)ONT read depth and bottom sequence sequence identity head maps generated using  
 750 StainedGlass pipeline (using 5-kb window size). Asterisks indicate two samples (HG03492 and HG00731) with  
 751 a single gap in the *DYZ3* array. na - not available.

752

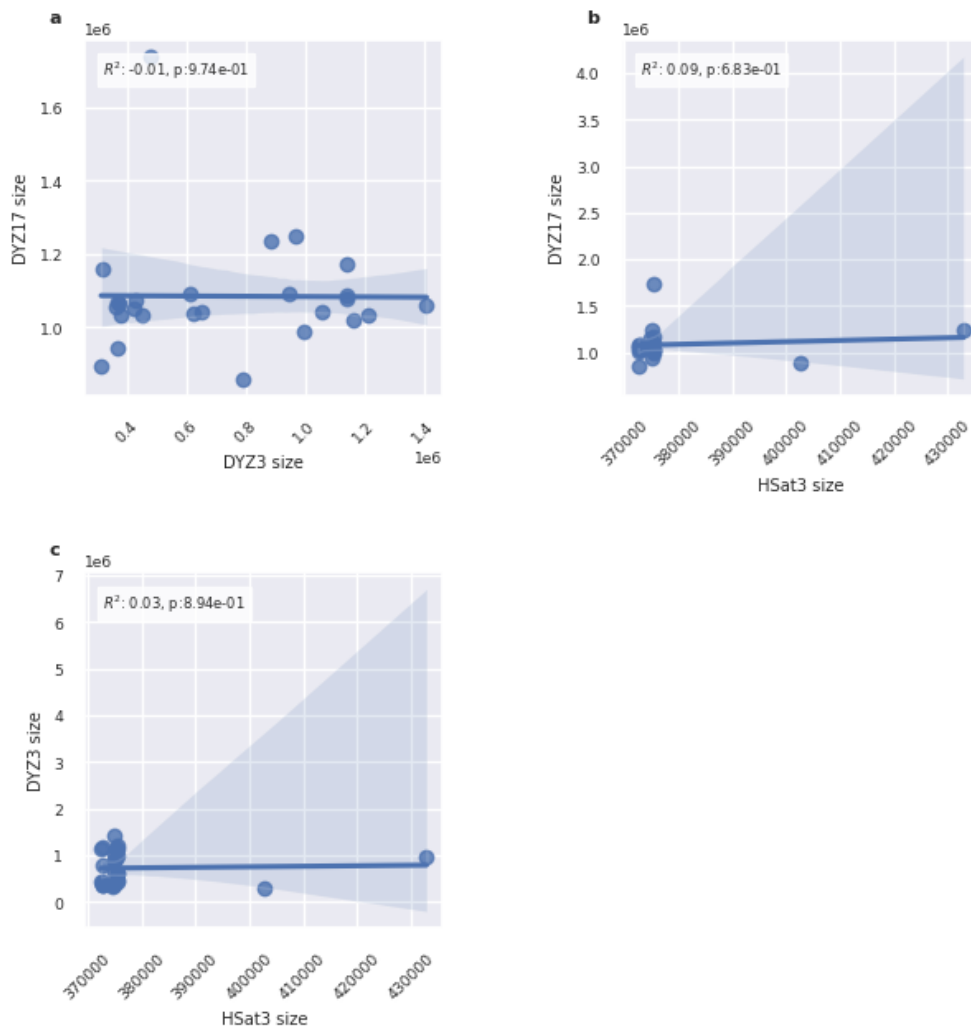

753

754 **Figure S36.** Regression plots between the sizes of (peri-)centromeric repeat arrays: *DYZ3* alpha-satellite array,  
 755 Hsat3, and the *DYZ17* array. We report the correlation coefficient and the p-value on the upper-left corner box.  
 756 No correlations attained a significant p-value.

757

# DYZ18

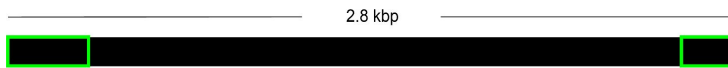

# 3.1 kbp

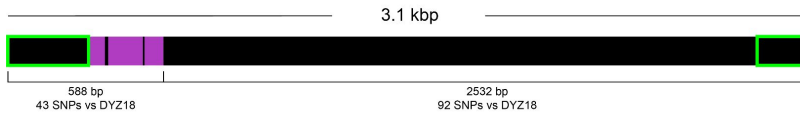

# 2.7 kbp

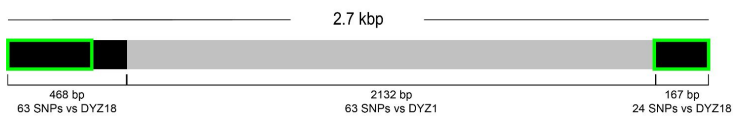

# DYZ1

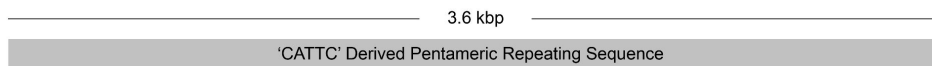

# DYZ2

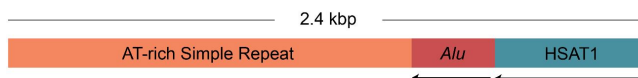

758

759

760

761

762

763

**Figure S37.** Composition and similarities of Yq12 heterochromatic repeat units. Green highlight - indicates regions with high sequence similarity to the *DYZ18* repeat unit. Light gray region in 2.7-kb repeat indicates a region of high sequence similarity to the *DYZ1* repeat unit. The purple region is a span of ~200-300 bases unique to the 3.1-kbp repeat.

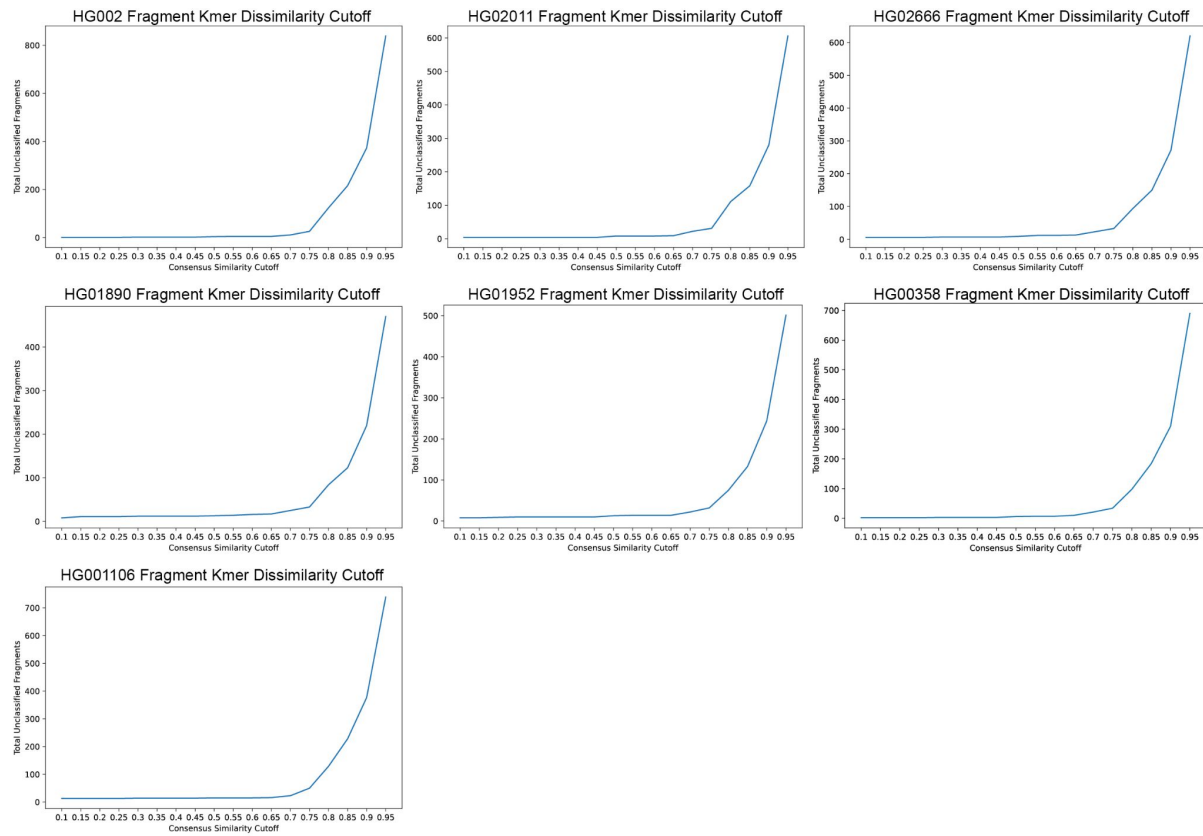

**Figure S38.** The line plots show the total HaeIII fragments (y-axis) that are unclassified at each k-mer abundance profile similarity cutoff (x-axis). Fragments were classified as either *DYZ18*, 3.1-kbp repeat, 2.7-kbp repeat, or *DYZ1* if their k-mer abundance profile was 75% or more similar. Each genome's plot exhibits an exponential growth in unclassified fragments above the 75% similarity cutoff.

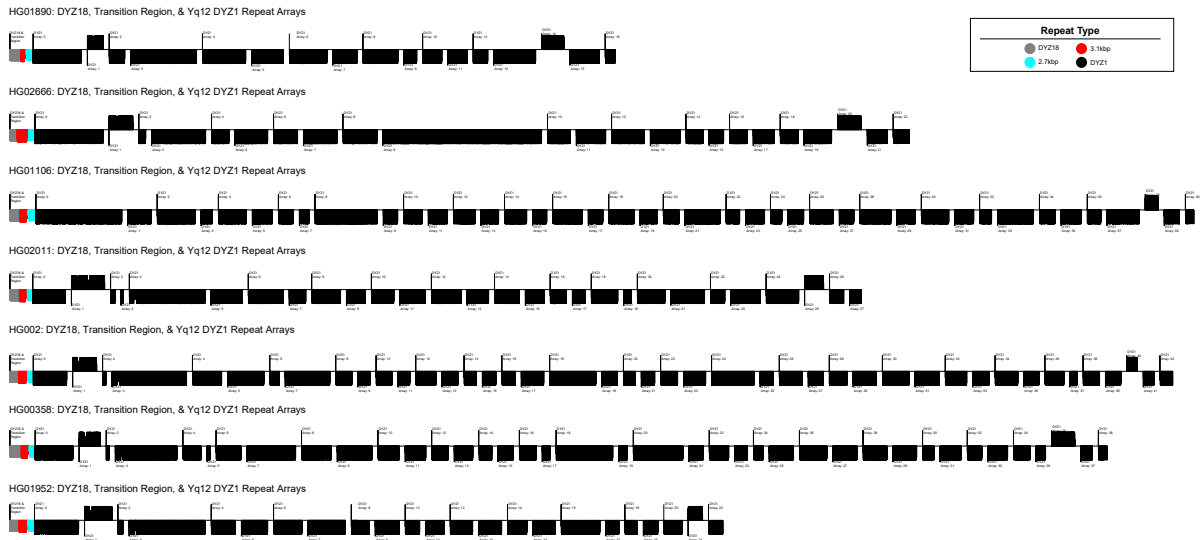

771 **Figure S39.** An overview of the *DYZ18* (gray), 3.1-kbp (red), 2.7-kbp (blue) and *DYZ1* (black) repeat  
 772 arrays in the Yq11/transition region/Yq12 subregion within each of the seven samples with completely  
 773 assembled Yq12 subregion. The length of individual lines is a function of the size of the repeat. The  
 774 orientation (up = sense, down = antisense) was determined based on RepeatMasker annotations of  
 775 satellite sequences within repeats.

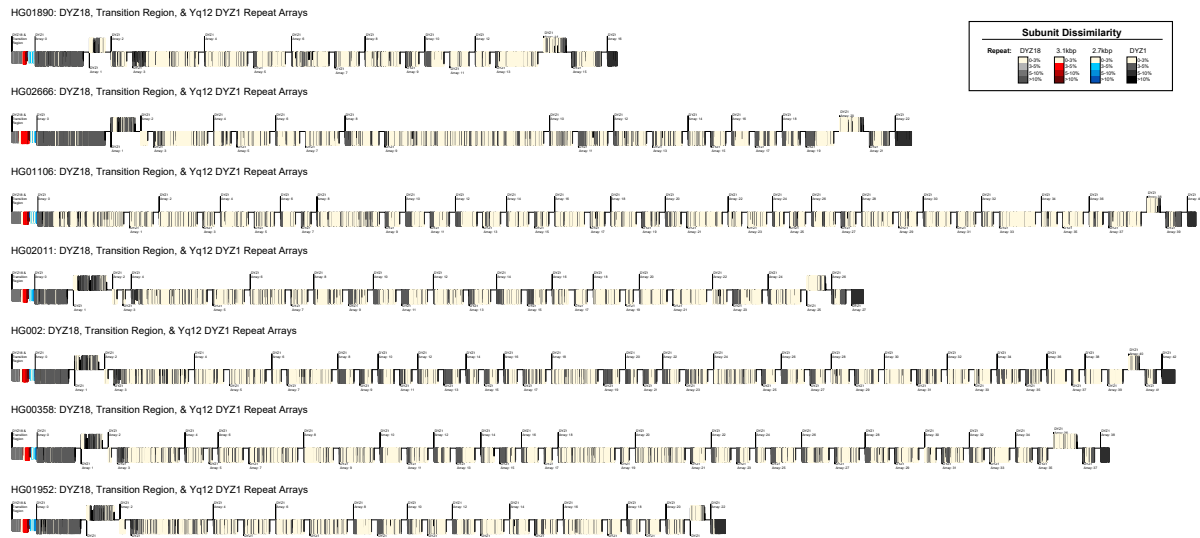

777 **Figure S40.** An overview of the Bray-Curtis distance/dissimilarity of k-mer abundance profiles for  
 778 individual *DYI18* (gray), 3.1-kbp (red), 2.7-kbp (blue) and *DYI1* (black) repeats versus their consensus  
 779 sequence. The Yq11/transition region/Yq12 subregion are shown for each of the seven samples with a  
 780 completely assembled Yq12 subregion. Lighter colors indicate less distance/dissimilarity (more similar)  
 781 k-mer abundance profiles compared to their consensus sequence. Results indicate arrays located on the  
 782 proximal and distal boundaries of the Yq12 region contain repeats with k-mer abundance compositions  
 783 less similar to their consensus sequence (i.e., more diverged). The length of individual lines is a function  
 784 of the size of the repeat. The orientation (up = sense, down = antisense) was determined based on  
 785 RepeatMasker annotations of satellite sequences within repeats.

786

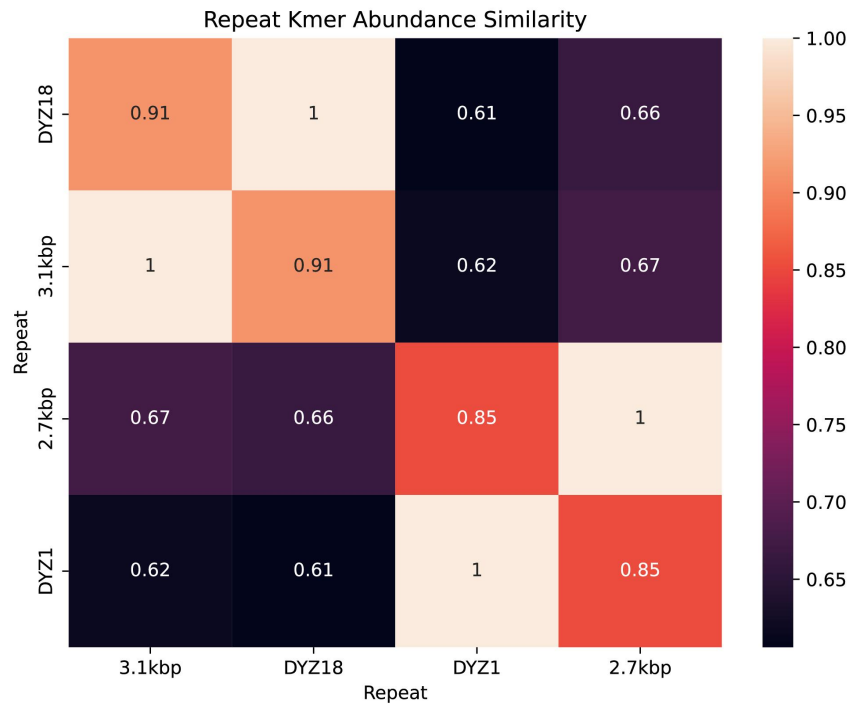

787

788 **Figure S41.** Heatmap of the complement of the Bray-Curtis distance/dissimilarity (i.e., 1-BC) between k-mer  
789 abundance profiles of *DYZ18*, 3.1-kbp, 2.7-kbp, and *DYZ1* consensus sequences is shown. The k-mer abundance  
790 profile of *DYZ1* was most similar to the 2.7-kbp repeat (85%), whereas the *DYZ18* and 3.1-kbp repeat sequences  
791 were more similar (91%) to each other.

792

793



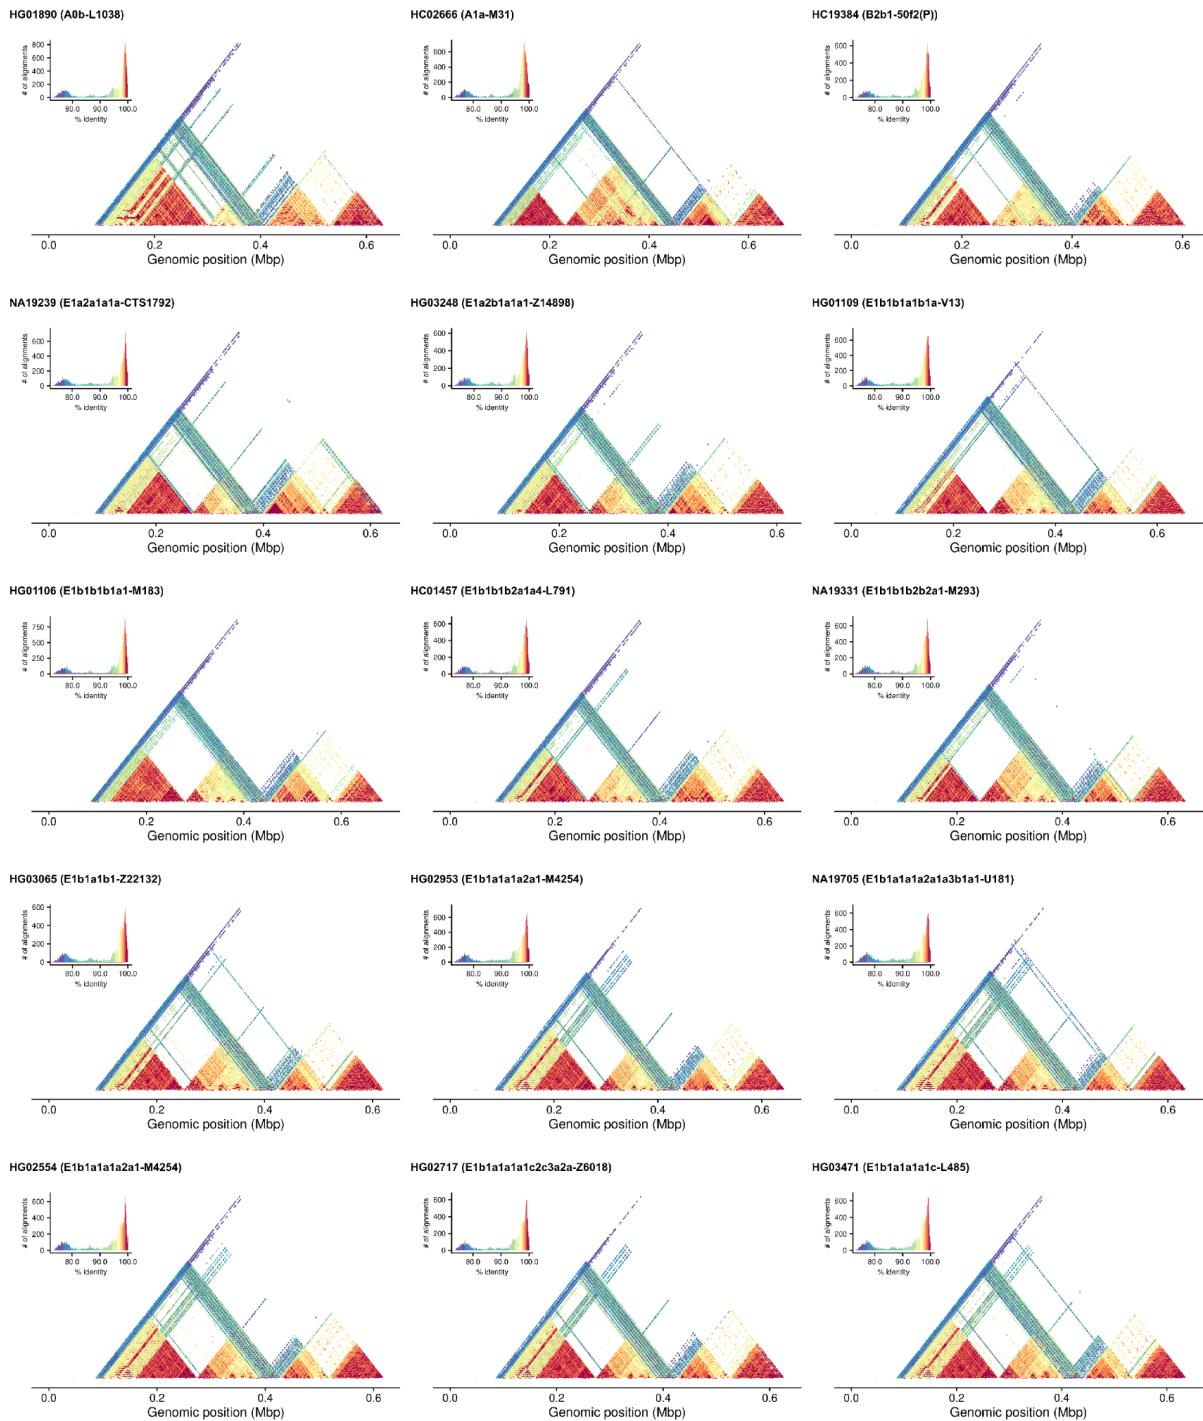

794

795 **Figure S42.** Sequence identity heat map of the Yq11/Yq12 transition region, including the *DYZ18*, 3.1-kbp, 2.7-  
 796 kbp repeat arrays and 100 kbp of the first *DYZ1* repeat array generated using StainedGlass with 2 kbp window  
 797 size. 100 kbp proximal to the *DYZ18* repeat array has also been included. Samples are ordered phylogenetically  
 798 from the deepest-rooting sample (from left to right). The plot highlights higher sequence similarity between the  
 799 *DYZ18* and 3.1-kbp repeat arrays, and between the 2.7-kbp and *DYZ1* repeat arrays, respectively.

800

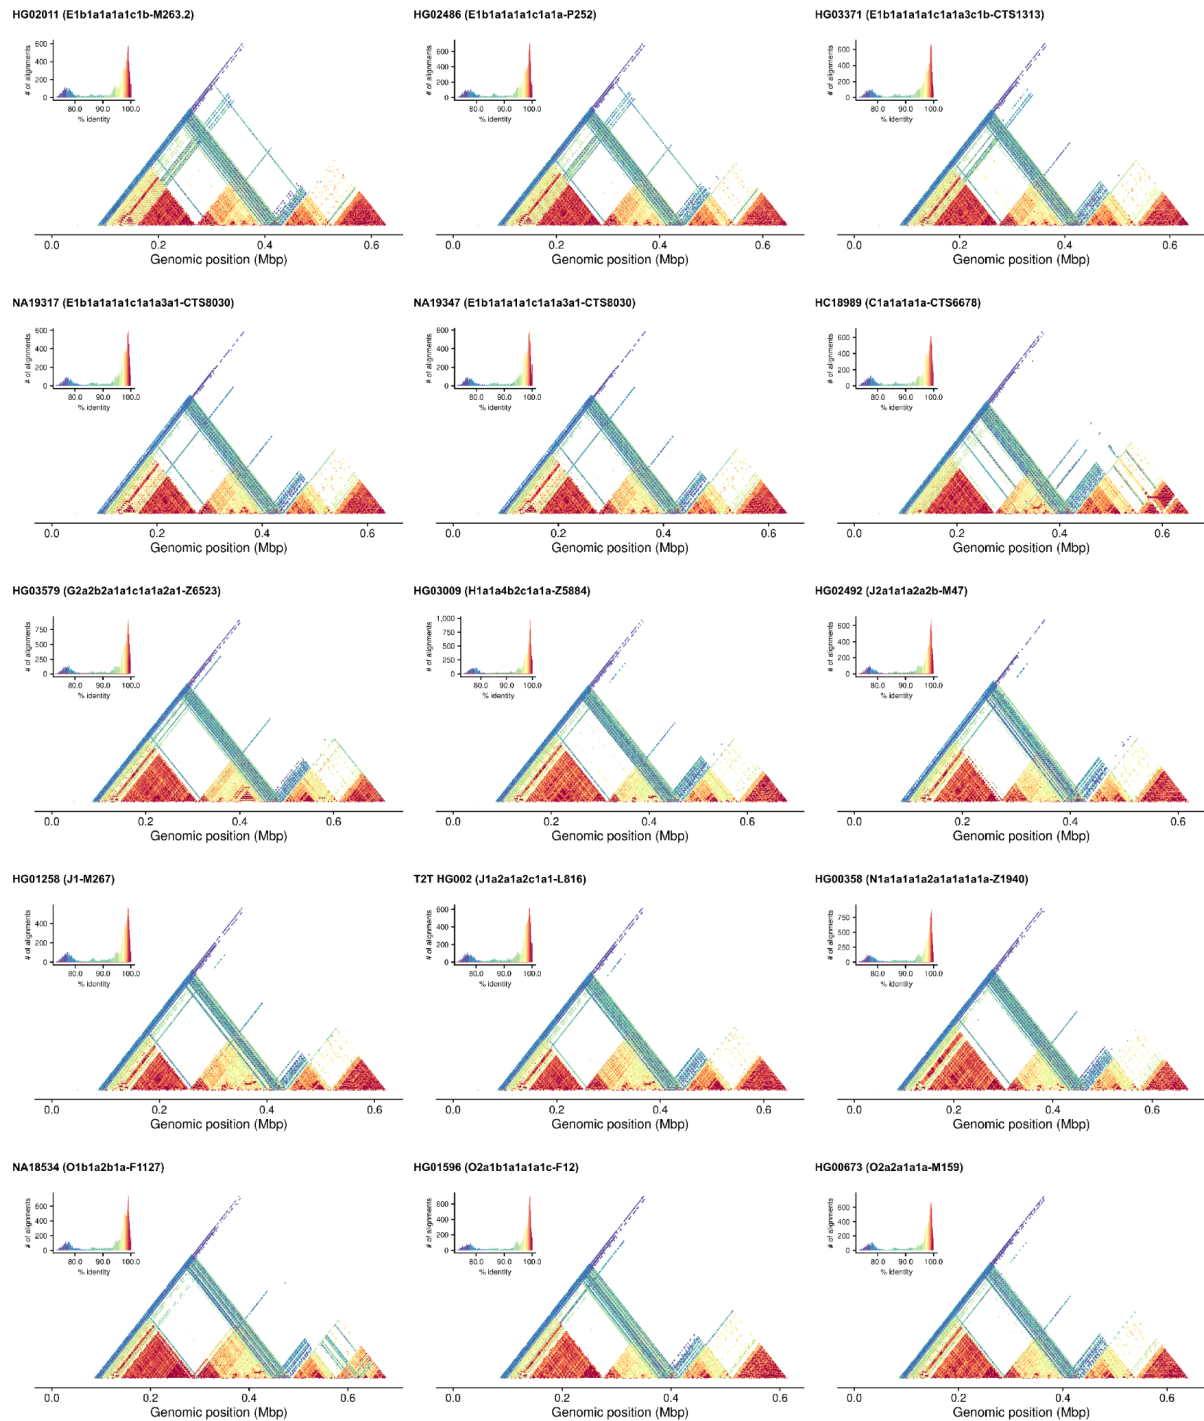

801

802 **Figure S43.** Sequence identity heat map of the Yq11/Yq12 transition region, including the *DYI8*, 3.1-kbp, 2.7-  
 803 kbp repeat arrays and 100 kbp of the first *DYI1* repeat array generated using StainedGlass with 2 kbp window  
 804 size. 100 kbp proximal to the *DYI8* repeat array has also been included. Samples are ordered phylogenetically  
 805 from the deepest-rooting sample (from left to right). The plot highlights higher sequence similarity between the  
 806 *DYI8* and 3.1-kbp repeat arrays, and between the 2.7-kbp and *DYI1* repeat arrays, respectively.

807

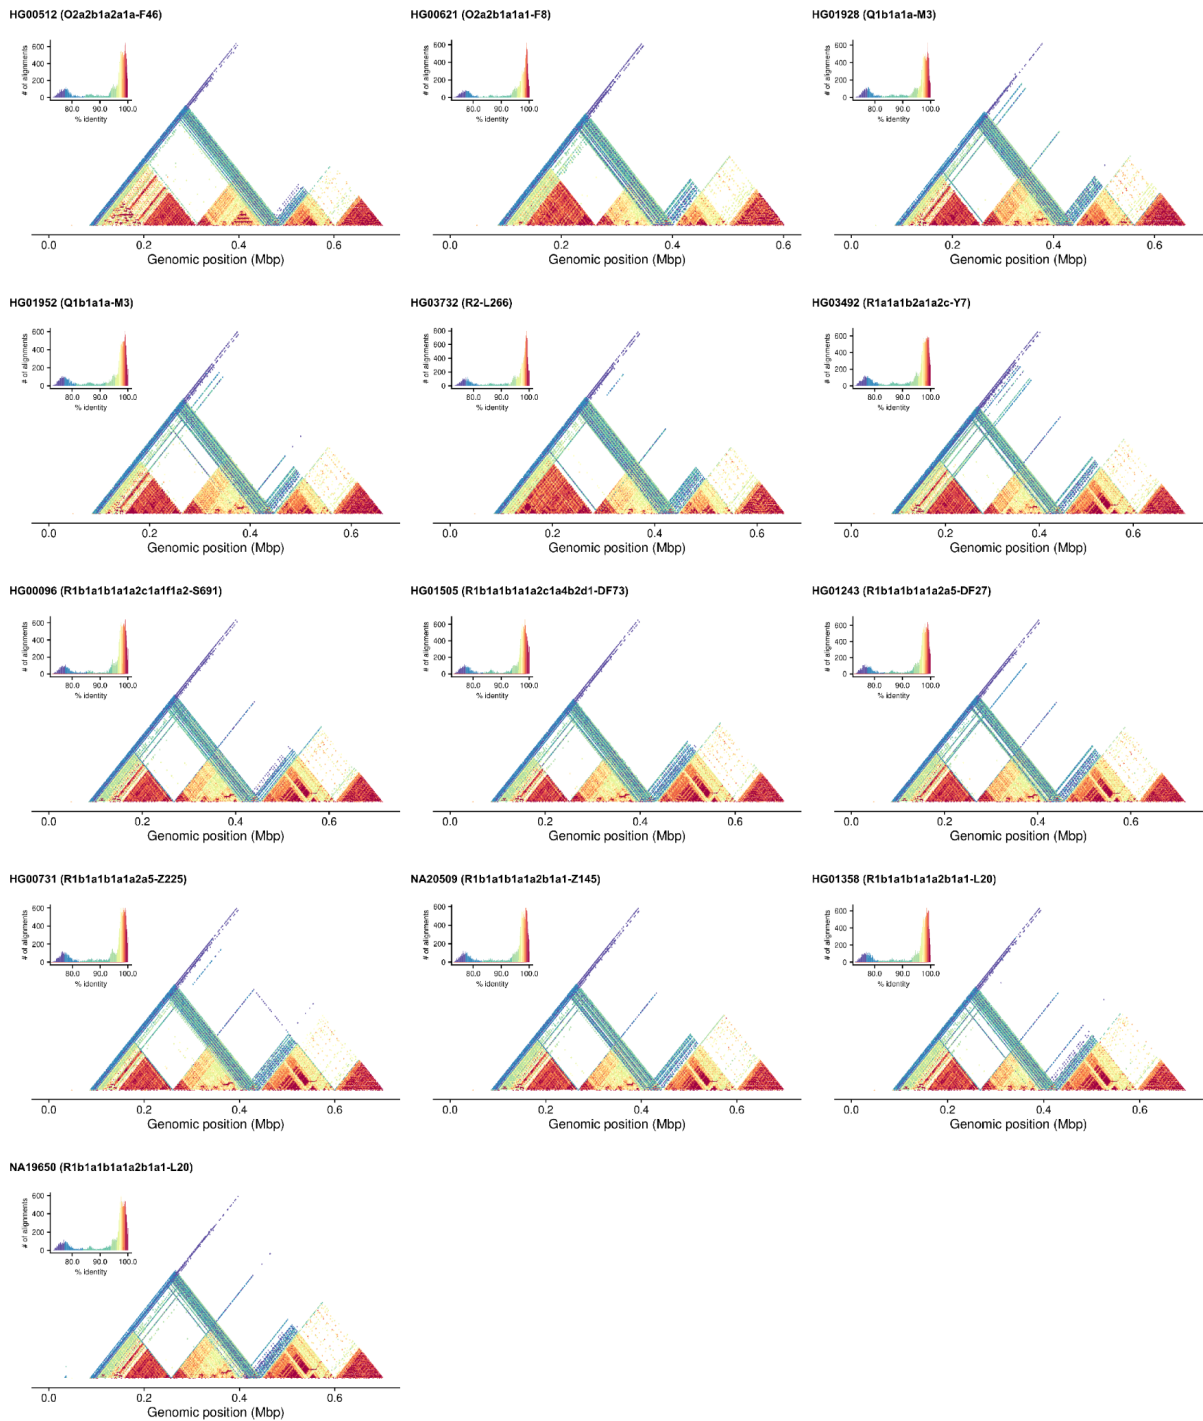

808

809 **Figure S44.** Sequence identity heat map of the Yq11/Yq12 transition region, including the *DYZ18*, 3.1-kbp, 2.7-  
 810 kbp repeat arrays and 100 kbp of the first *DYZ1* repeat array generated using StainedGlass with 2 kbp window  
 811 size. 100 kbp proximal to the *DYZ18* repeat array has also been included. Samples are ordered phylogenetically  
 812 from the deepest-rooting sample (from left to right). The plot highlights higher sequence similarity between the  
 813 *DYZ18* and 3.1-kbp repeat arrays, and between the 2.7-kbp and *DYZ1* repeat arrays, respectively.

814

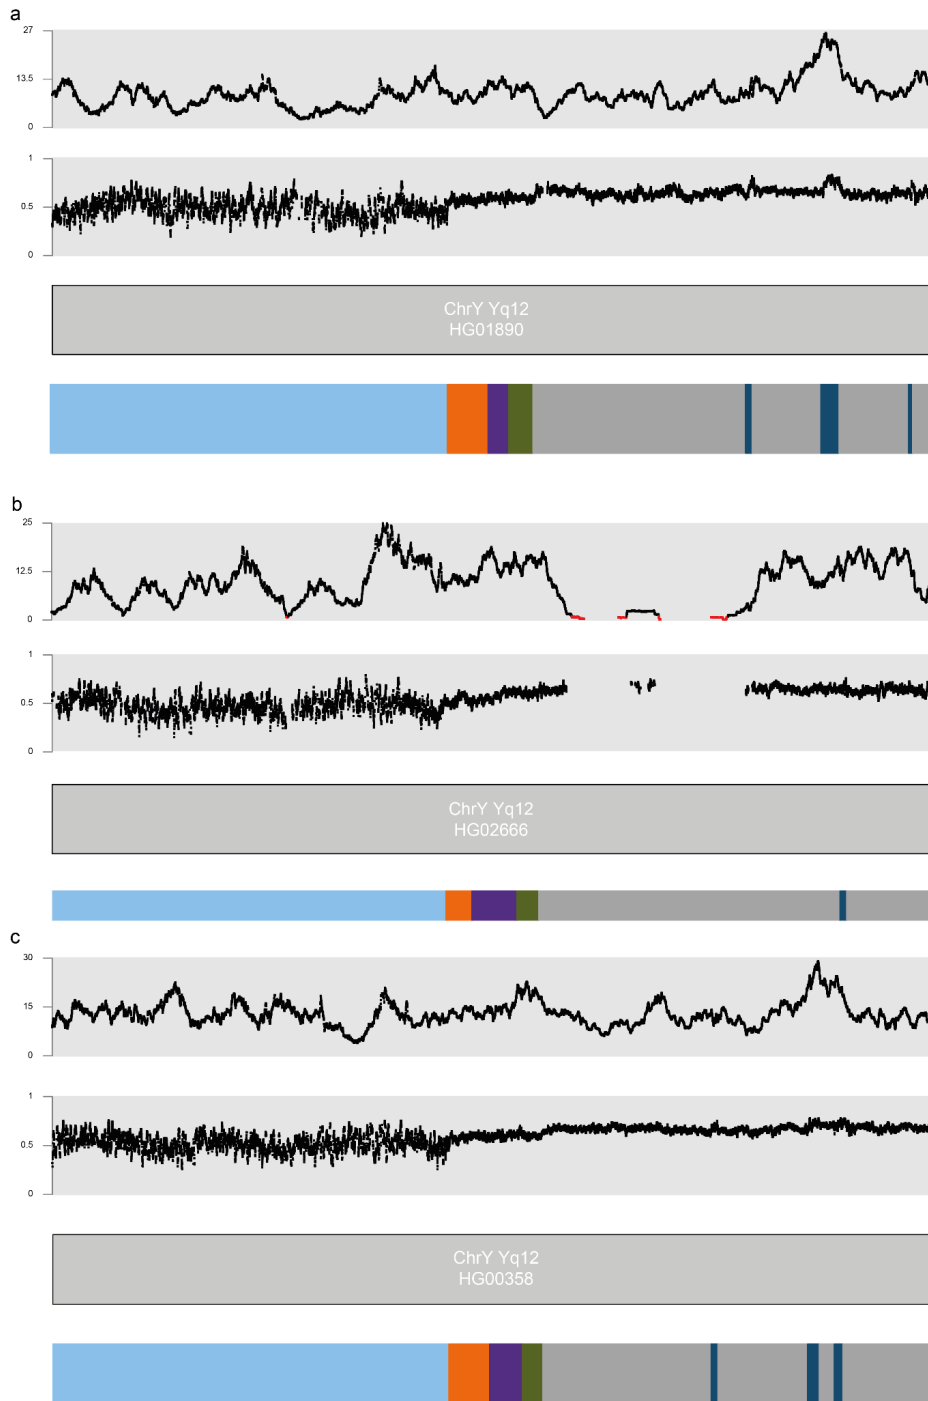

815

816 **Figure S45.** ONT read depth (top) and methylation patterns (below) around the boundary of Yq11 euchromatin  
 817 and the Yq12 heterochromatic subregion across the three contiguously assembled Y chromosomes, with the  
 818 sequence annotations shown below (light blue - ampliconic 7 subregion, orange - *DYZ18*, purple - 2.7-kb repeat,  
 819 green - 3.1-kb repeat, gray - *DYZ1*, dark blue - *DYZ2*).

820

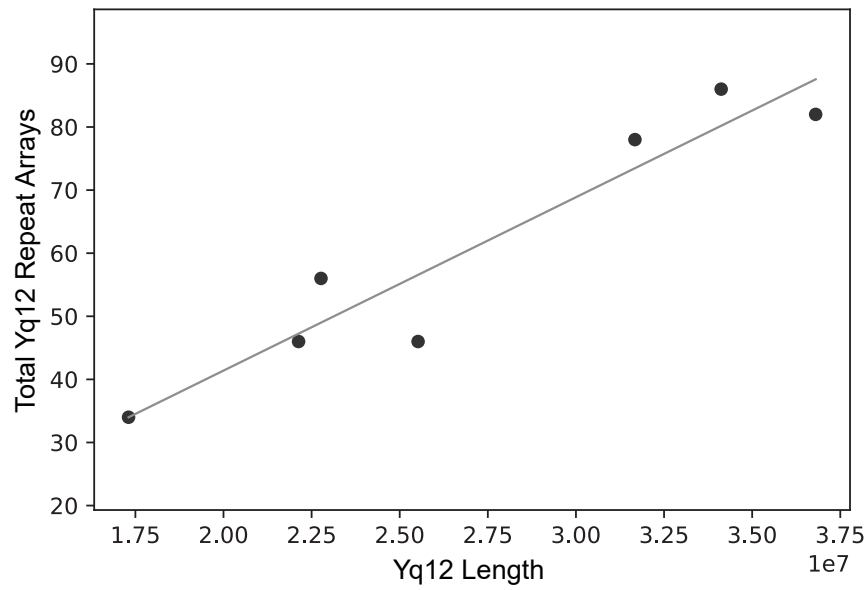

821

822 **Figure S46.** A scatter plot showing the total number of *DYZI* and *DYZ2* arrays within the Yq12  
 823 subregions of each sample (n=7, samples with complete assembly plus the T2T Y) (y-axis) versus the  
 824 total length of the Yq12 region (x-axis) is illustrated. This relationship was found to be significantly  
 825 positively correlated (two-sided Spearman correlation=0.90; p-value < 0.05).

826  
827

**a**

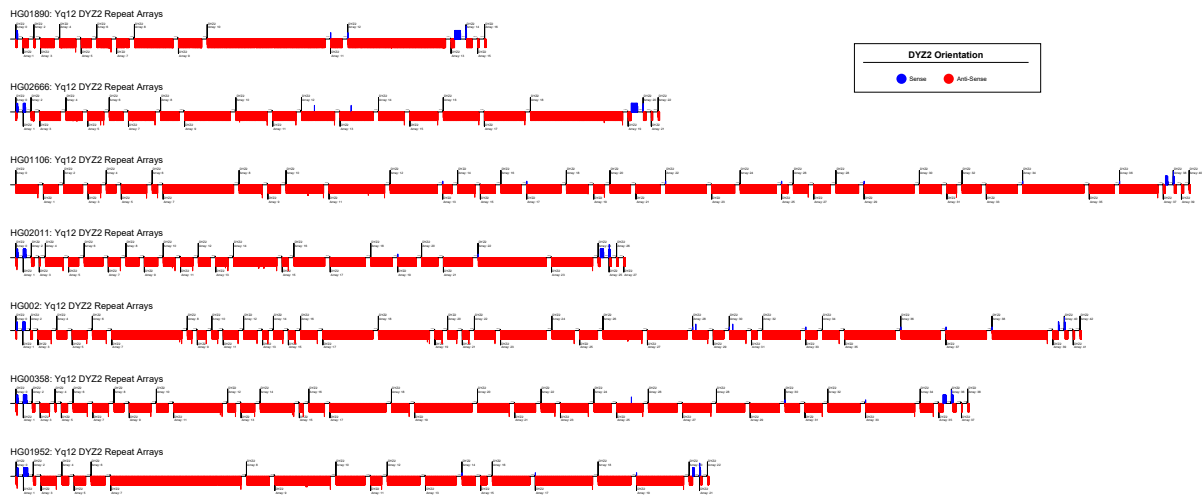

828  
829

**b**

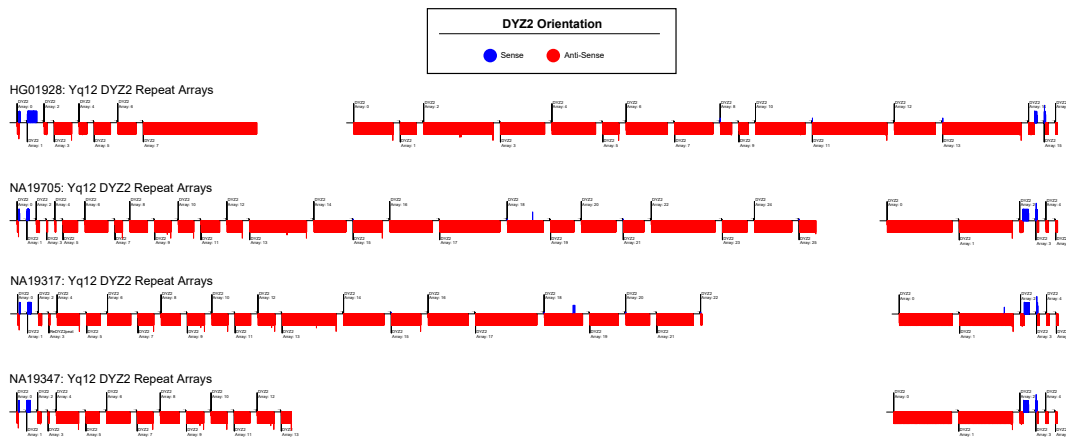

830

831 **Figure S47.** Overview of the *DYZ2* repeat array orientation and structure within the Yq12 subregion  
832 of each **a.** sample with completely assembled Yq12 subregion, and **b.** the four additional genomes  
833 (HG01928, NA19705, NA19317, NA19347) with incompletely assembled Yq12 regions. Red lines  
834 indicate individual *DYZ2* repeats in antisense orientation, blue lines indicate individual *DYZ2* repeats in  
834 sense orientation relative to the *DYZ2* consensus sequence. The length of each line is a function of the  
835 length of the repeat.  
836

837  
838  
839

**a**

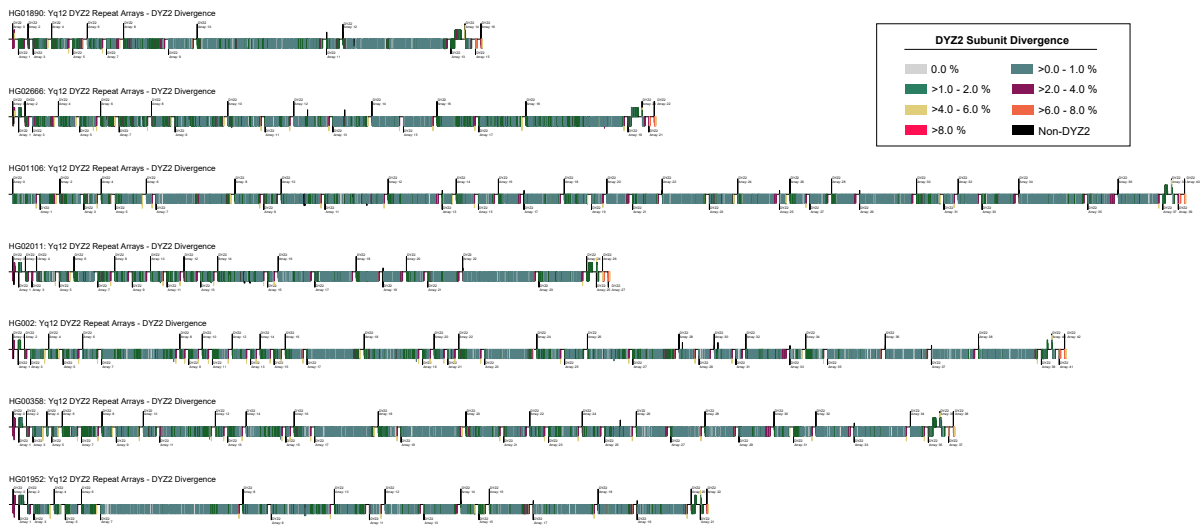

840  
841

**b**

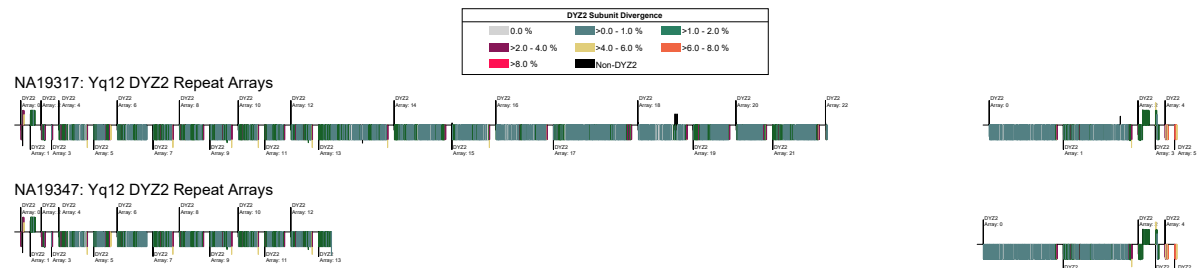

842

843 **Figure S48.** An overview of the divergence of individual *DYZZ* subunits for **a.** samples with completely  
844 assembled Yq12 subregion (HG01890, HG02666, HG01106, HG02011, T2T Y, HG00358, HG01952),  
845 and **b.** the two most closely related genomes (NA19317 and NA19347) with incompletely assembled  
846 Yq12 sunregions. A higher divergence was observed within the subunits located in arrays at the proximal  
847 and distal ends of the Yq12 subregion. Additionally, *DYZZ* subunits located near the boundaries of  
848 individual arrays tend to be more diverged than those located centrally. Between the closely related  
849 genomes, the divergence of *DYZZ* repeats within the shared *DYZZ* arrays are extremely similar.  
850

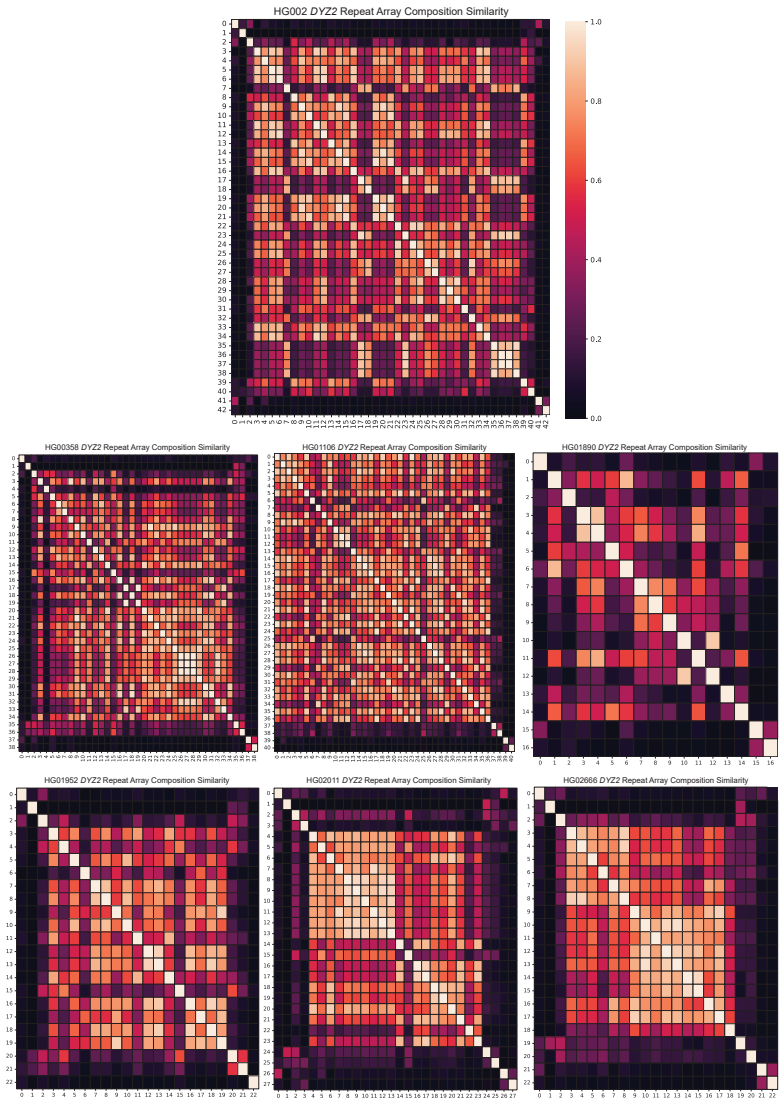

851

852 **Figure S49.** Heatmaps showing the complement of the Bray-Curtis (BC) distance/dissimilarity (i.e.,  
 853 1-BC) for *DYZ2* repeat arrays within each genome with a completely assembled Yq12 subregion. Higher  
 854 values (i.e., 1.00) indicate *DYZ2* arrays that contain exactly the same subunit composition whereas  
 855 lower values (i.e., 0.0) suggest the opposite. Results show that the composition of arrays closer to one  
 856 another tend to be more similar, except for the arrays located in the proximal and distal inversions,  
 857 which tend to be more similar to each other than to surrounding arrays.  
 858



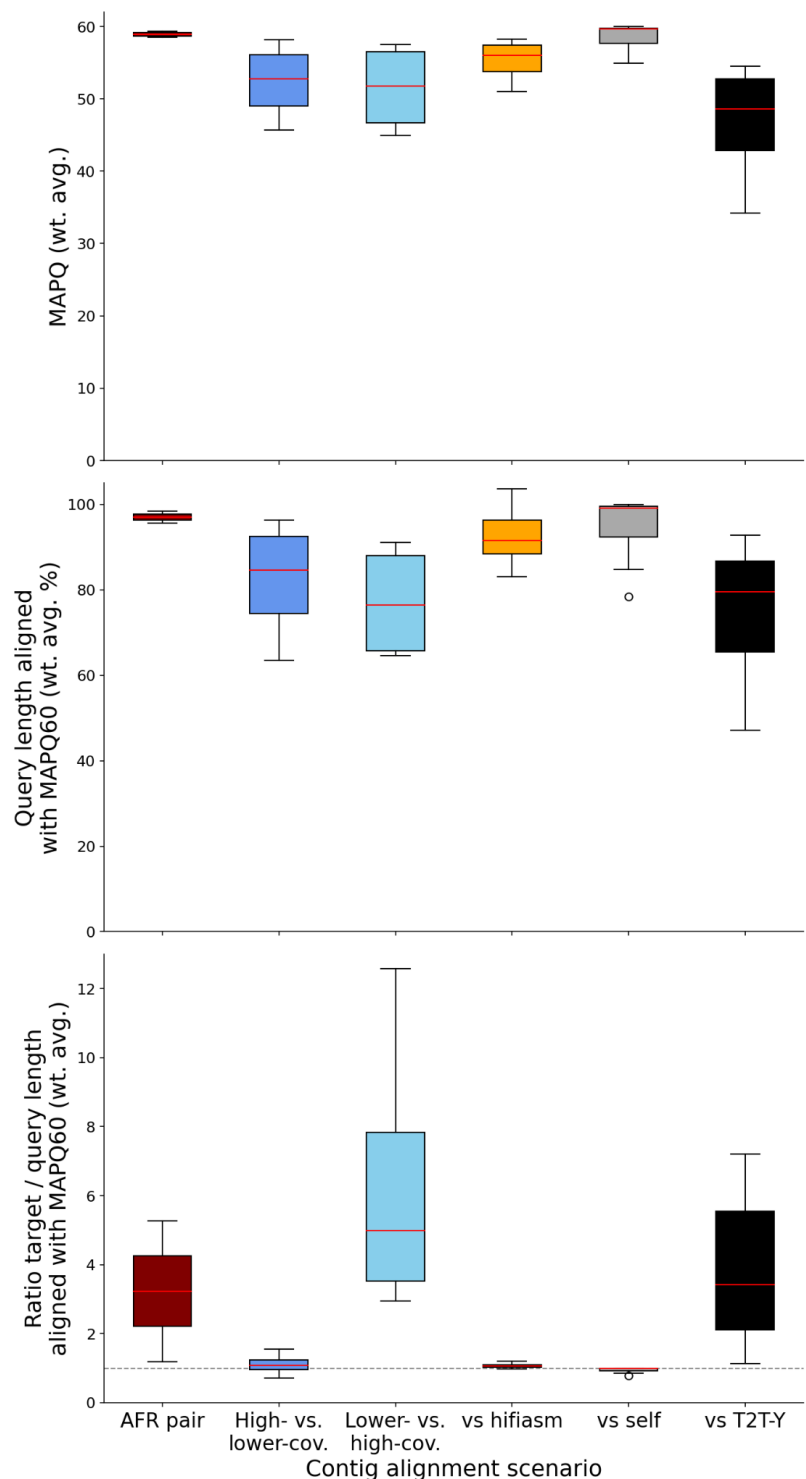

859

860 **Figure S50.** QC contig alignments for high-coverage samples in various scenarios: box plots depicting contig  
 861 alignment statistics for (from left to right) the pair of closely related AFR samples (NA19317 and NA19347, dark  
 862 red); the four selected high-coverage samples assembled with lower coverage for QC purposes, using the lower-  
 863 coverage assembly as alignment target (dark blue) and vice versa the high-coverage assembly (light blue); the  
 864 sample-matched alignment of Verkko- to hifiasm-assembled contigs (orange); the self-alignment of Verkko-  
 865 assembled contigs (gray); contig-to-reference alignment using the T2T Y sequence as alignment target (black).  
 866 Computed statistics per sample pair are (from top to bottom) average mapping quality (MAPQ) of the alignments  
 867 weighted by alignment length (in bp); percent of the query sequence aligning with MAPQ 60, averaged over all  
 868 contigs weighted by the contig length; ratio of target-to-query sequence lengths aligning with MAPQ 60, averaged  
 869 over all contigs weighted by contig length.

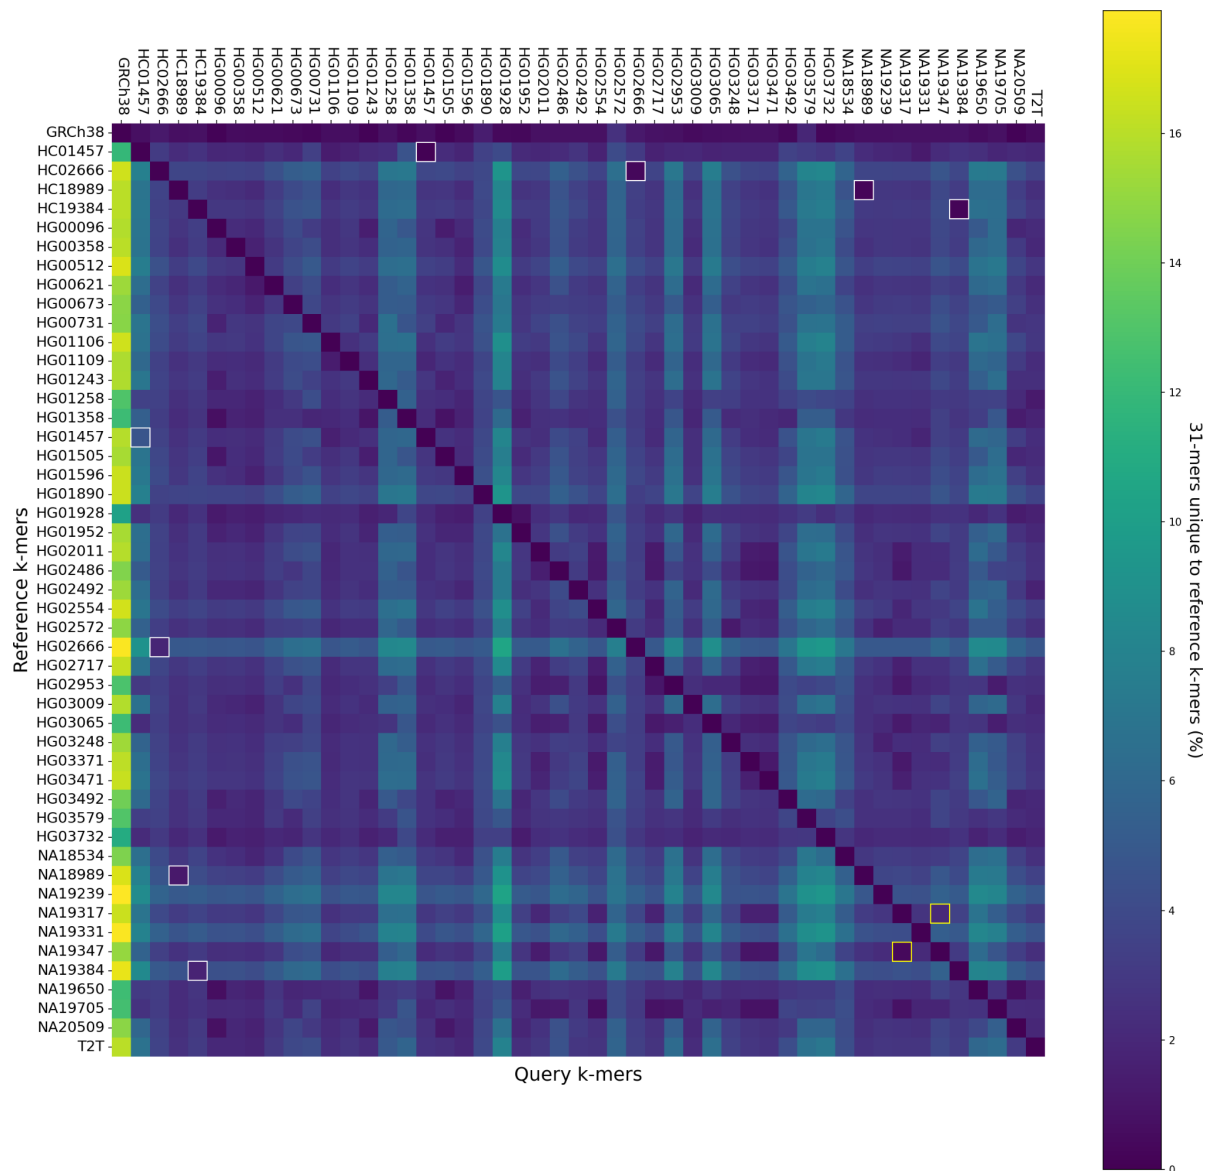

870

871 **Figure S51.** Unique sequence content in all assemblies expressed as percent of unique 31-mers relative to the  
 872 respective query assembly. Comparisons of the high-/low-coverage pairs (HC02666/HG02666,  
 873 HC01457/HG01457 etc.) are singled out by gray rectangles.

874

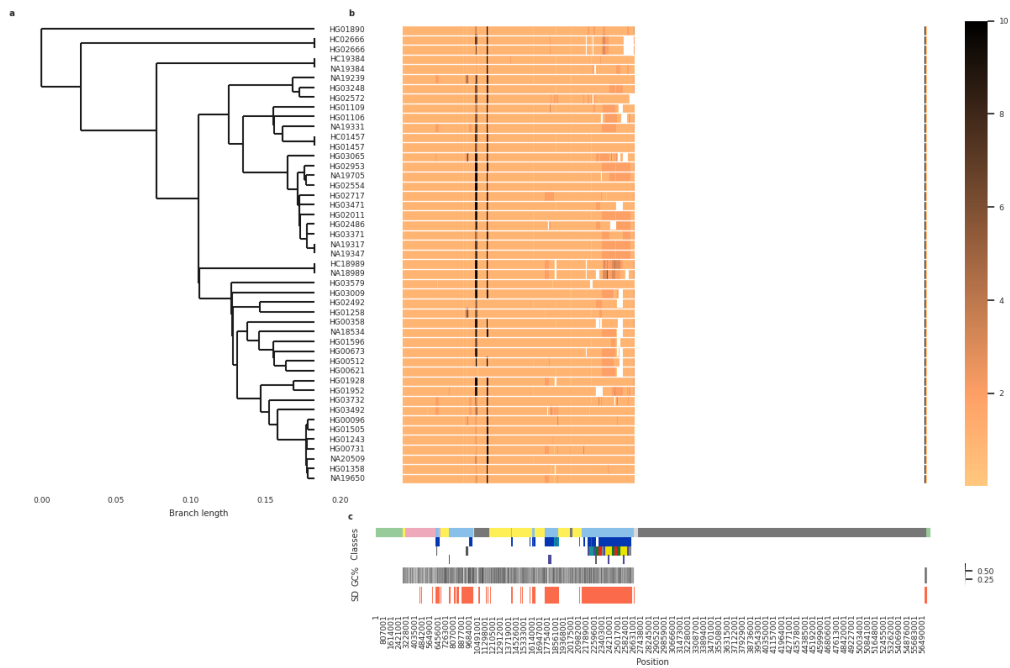

876

877 **Figure S52.** Composite plot depicting the Y contig alignments to the GRCh38 Y reference sequence across the  
 878 whole Y chromosome span. **a.** Phylogenetic relationships of the samples (see **Fig. S1** for details). Note that two  
 879 assemblies are visualized for 4 samples for which both high- and lower-coverage assemblies were generated  
 880 (HG02666, NA19384, HG01457 and NA18989; HC - refers to the high-coverage assembly; see Methods). **b.** The  
 881 coverage from Y contig alignments to reference sequence, with coverage=1 (light orange) in well-aligning  
 882 regions. Darker shades indicate regions with multiple contig alignments, potentially indicating assembly errors or  
 883 poor alignments, e.g., due to structural differences between the sample and reference or difficult sequence contexts  
 884 such as high repeat content; white denotes regions with no coverage i.e., no contig to reference alignments (note  
 885 - majority of the Yq12 subregion is not resolved in GRCh38, i.e., composed of 'Ns'). **c.** Y-chromosomal subregion  
 886 locations as described in **Fig. 1a**, locations of inverted repeats (in dark blue) and *AZFc*/ampliconic subregion 7  
 887 segmental duplications as shown in **Fig. S22**, followed by GC% and segmental duplication locations (**Methods**).

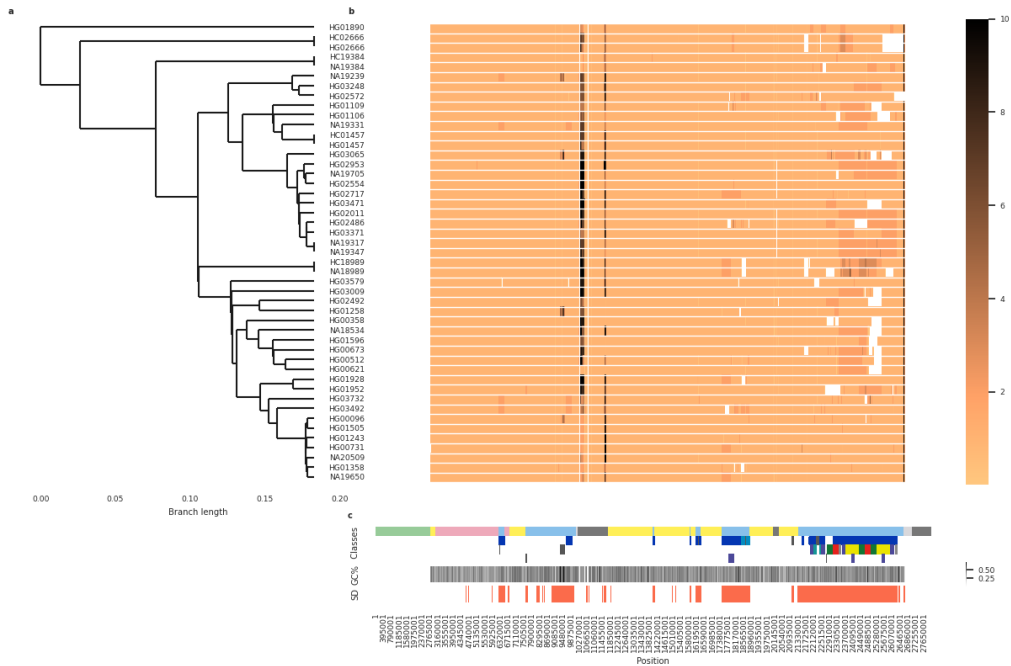

889 **Figure S53.** Composite plot depicting the Y contig alignments to the GRCh38 Y reference sequence excluding  
 890 Yq12 and PAR2 subregions. **a.** Phylogenetic relationships of the samples (see **Fig. S1** for details). Note that two  
 891 assemblies are visualized for 4 samples for which both high- and lower-coverage assemblies were generated  
 892 (HG02666, NA19384, HG01457 and NA18989; HC - refers to the high-coverage assembly; see Methods). **b.** The  
 893 coverage from Y contig alignments to reference sequence, with coverage=1 (light orange) in well-aligning  
 894 regions. Darker shades indicate regions with multiple contig alignments, potentially indicating assembly errors or  
 895 poor alignments, e.g., due to structural differences between the sample and reference or difficult sequence contexts  
 896 such as high repeat content; white denotes regions with no coverage i.e., no contig to reference alignments (note  
 897 - majority of the Yq12 subregion is not resolved in GRCh38, i.e., composed of ‘Ns’). **c.** Y-chromosomal subregion  
 898 locations as described in **Fig. 1a**, locations of inverted repeats (in dark blue) and *AZFc*/ampliconic subregion 7  
 899 segmental duplications as shown in **Fig. S22**, followed by GC% and segmental duplication locations (**Methods**).  
 900  
 901

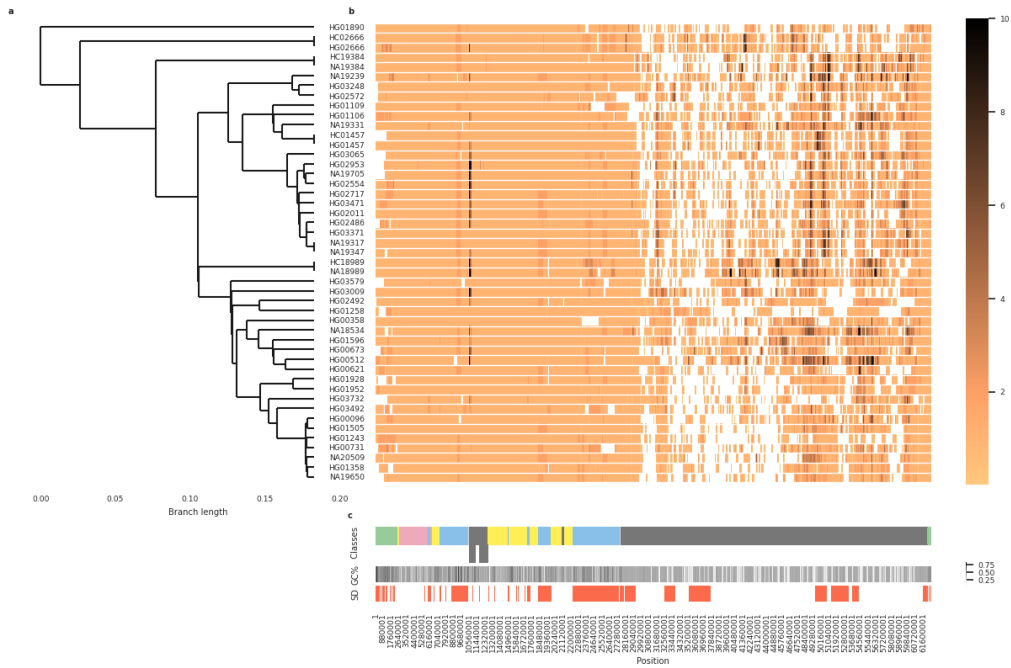

903  
 904  
 905  
 906  
 907  
 908  
 909  
 910  
 911  
 912  
 913  
 914

**Figure S54.** Composite plot depicting the Y contig alignments to the T2T Y reference sequence across the whole Y chromosome span. **a.** Phylogenetic relationships of the samples (see **Fig. S1** for details). Note that two assemblies are visualized for 4 samples for which both high- and lower-coverage assemblies were generated (HG02666, NA19384, HG01457 and NA18989; HC - refers to the high-coverage assembly; see Methods). **b.** The coverage from Y contig alignments to reference sequence, with coverage=1 (light orange) in well-aligning regions. Darker shades indicate regions with multiple contig alignments, potentially indicating assembly errors or poor alignments, e.g., due to structural differences between the sample and reference or difficult sequence contexts such as high repeat content; white denotes regions with no coverage i.e., no contig to reference alignments. **c.** Y-chromosomal subregion locations as described in **Fig. 1a**; below in gray locations of *DYZ3* (on the left) and *DYZ17* (on the right) repeat arrays, followed by GC% and segmental duplication locations (**Methods**).

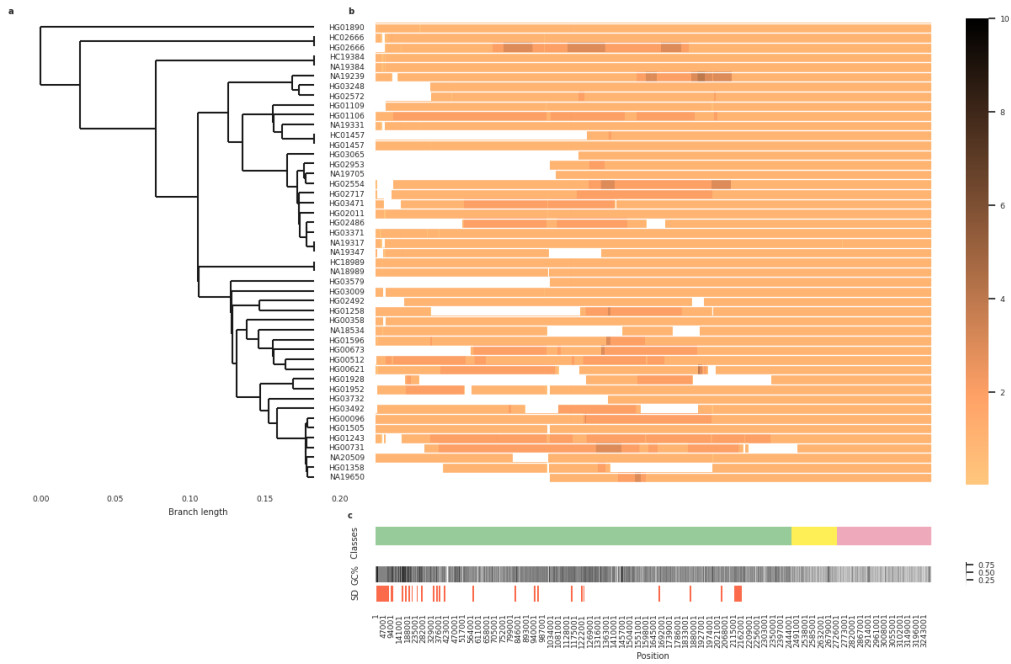

916  
917  
918  
919  
920  
921  
922  
923  
924  
925  
926

**Figure S55.** Composite plot depicting the Y contig alignments to the T2T Y reference sequence zooming into PAR1 subregion. **a.** Phylogenetic relationships of the samples (see **Fig. S1** for details). Note that two assemblies are visualized for 4 samples for which both high- and lower-coverage assemblies were generated (HG02666, NA19384, HG01457 and NA18989; HC - refers to the high-coverage assembly; see Methods). **b.** The coverage from Y contig alignments to reference sequence, with coverage=1 (light orange) in well-aligning regions. Darker shades indicate regions with multiple contig alignments, potentially indicating assembly errors or poor alignments, e.g., due to structural differences between the sample and reference or difficult sequence contexts such as high repeat content; white denotes regions with no coverage i.e., no contig to reference alignments. **c.** Y-chromosomal subregion locations as described in **Fig. 1a**, followed by GC% and segmental duplication locations (**Methods**).

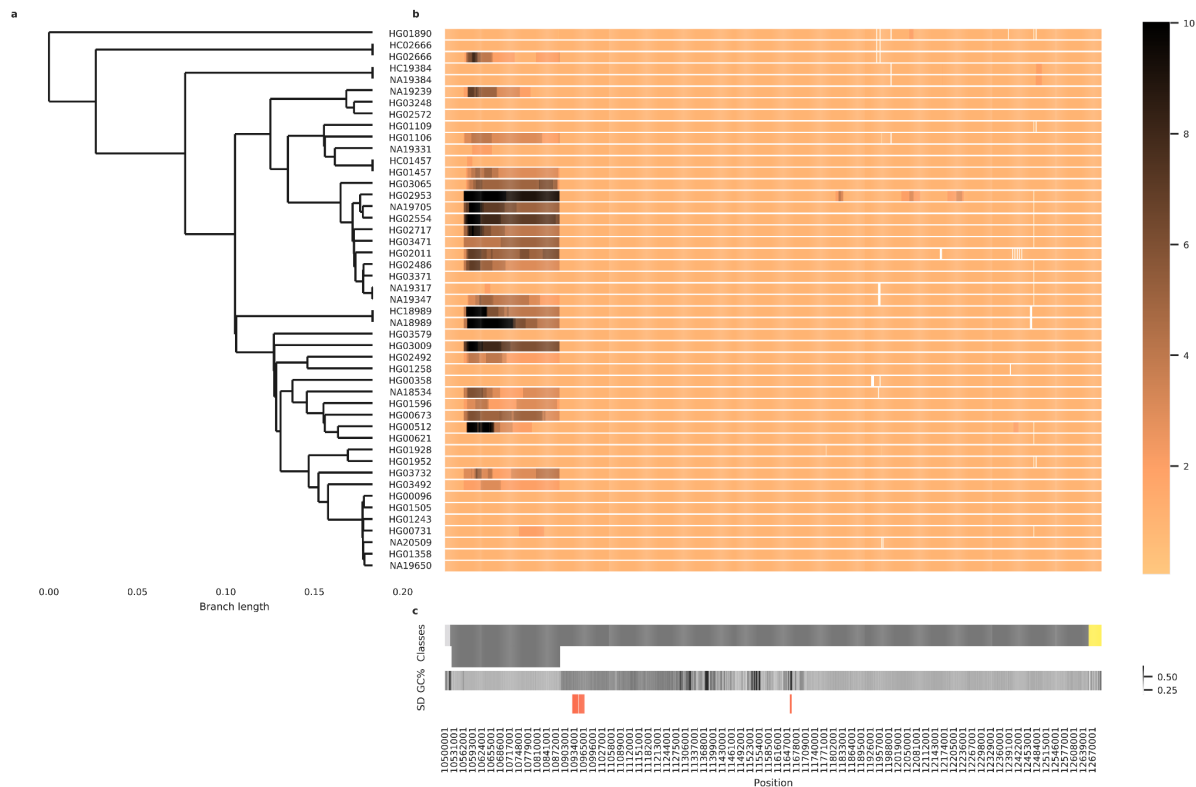

927  
 928 **Figure S56.** Composite plot depicting the Y contig alignments to the T2T Y reference sequence zooming into the  
 929 (peri-)centromeric region. **a.** Phylogenetic relationships of the samples (see **Fig. S1** for details). Note that two  
 930 assemblies are visualized for 4 samples for which both high- and lower-coverage assemblies were generated  
 931 (HG02666, NA19384, HG01457 and NA18989; HC - refers to the high-coverage assembly; see Methods). **b.** The  
 932 coverage from Y contig alignments to reference sequence, with coverage=1 (light orange) in well-aligning  
 933 regions. Darker shades indicate regions with multiple contig alignments, potentially indicating assembly errors or  
 934 poor alignments, e.g., due to structural differences between the sample and reference or difficult sequence contexts  
 935 such as high repeat content; white denotes regions with no coverage i.e., no contig to reference alignments. **c.**  
 936 Location of the (peri-)centromeric region (above) and the *DYZ3*  $\alpha$ -satellite repeat array (below) shown in dark gray,  
 937 followed by GC% and segmental duplication locations (**Methods**).

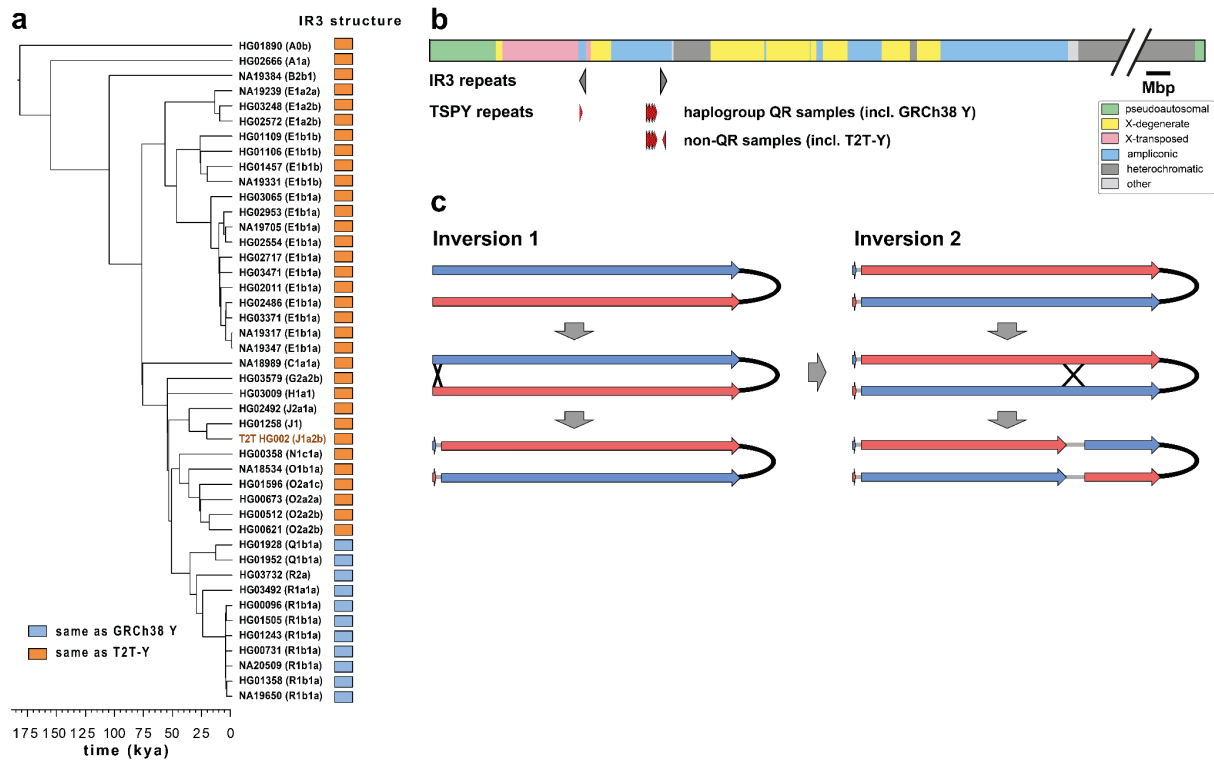

938

939 **Figure S57.** Phylogenetic distribution of different IR3 repeat compositions and the responsible IR3 inversion. **a.**  
 940 Distribution of two different IR3 repeat compositions in the Y-chromosomal phylogeny. In orange - samples  
 941 containing a single TSPY repeat in the proximal IR3 repeat in inverted orientation, in blue - samples containing a  
 942 single TSPY repeat in the distal IR3 repeat in direct orientation. **b.** Schematic representation of IR3 composition  
 943 and approximate locations of TSPY repeats relative to the Y chromosome structure. **c.** Identified inversions in  
 944 phylogenetically related QR haplogroup samples - one changing the location and orientation of the single TSPY  
 945 repeat from proximal to distal IR3 repeat, and another reversing the orientation of the region in between IR3  
 946 repeats. The inversions are indicated by black crosses. Blue and red arrows indicate distal and proximal IR3  
 947 repeats, respectively.

948



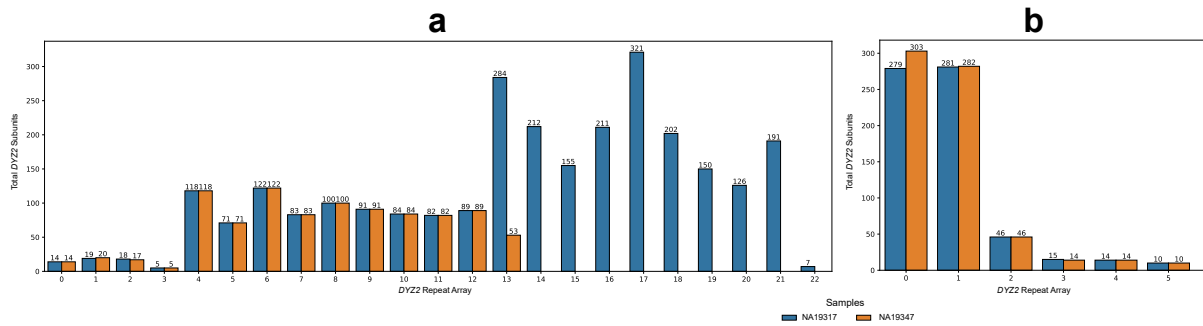

949  
 950  
 951  
 952  
 953  
 954

**Figure S58.** The bar plots show a comparison of the total *DY22* repeat copy numbers (y-axis) in each *DY22* array (x-axis) within the two most closely related genomes (NA19317 (blue) and NA19347 (orange)). **a.** *DY22* arrays within the proximally assembled contigs. **b.** *DY22* arrays within the distally assembled contigs. The analyses revealed an equal number of *DY22* repeats within 14 of 20 arrays.

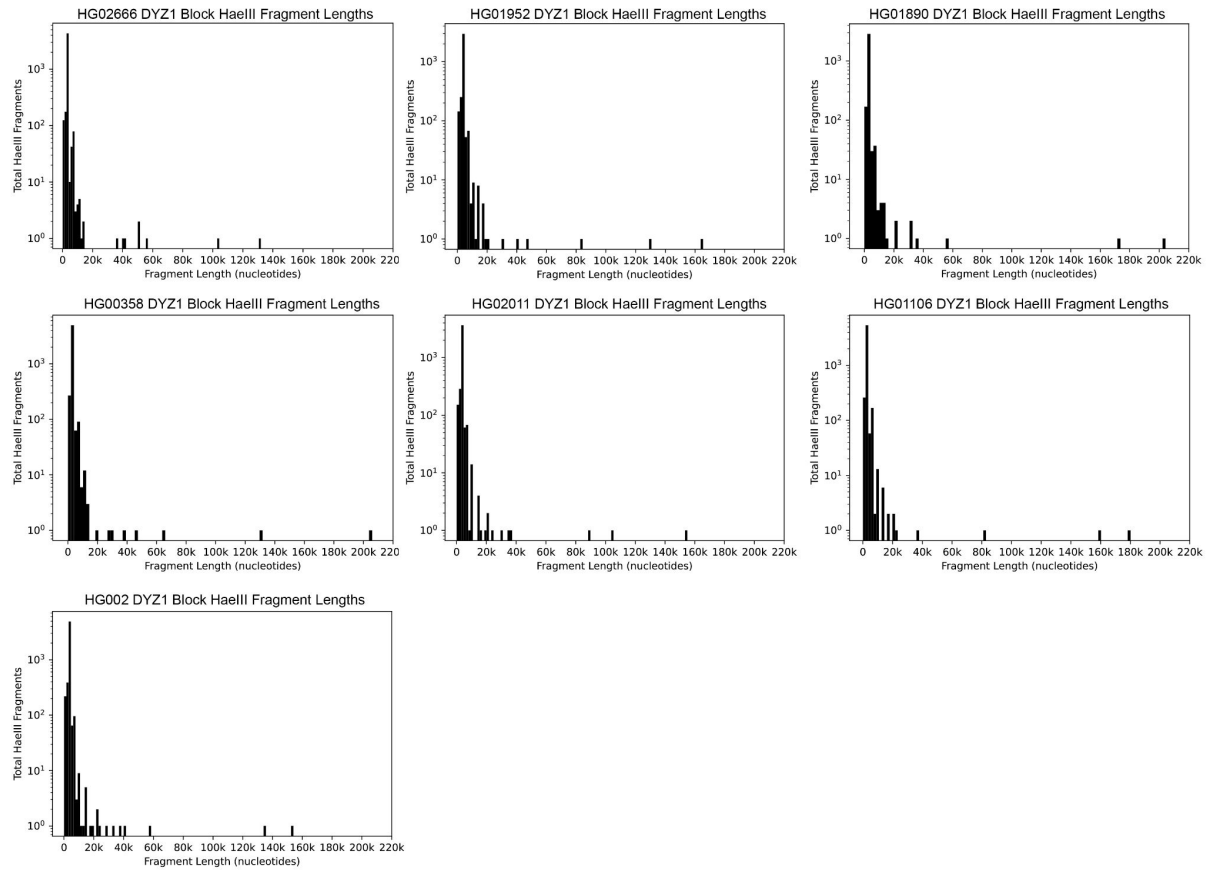

956

957

958

959

960

**Figure S59.** The distribution of total *DYZ1* array HaeIII virtual restriction digestion fragments (y-axis) and their lengths (x-axis) for each genome with a completely assembled Yq12 region is shown in the histograms. The majority of *DYZ1* repeat units were between 3-4 kbp in length within each genome.

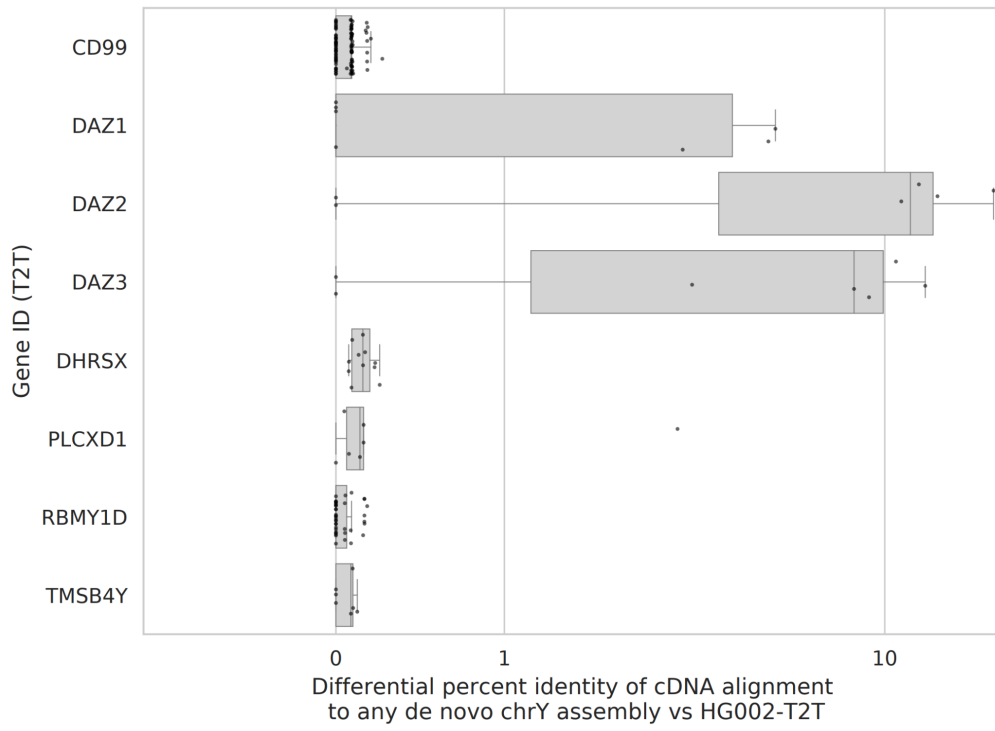

961

962 **Figure S60.** Testis Iso-seq percent identity to *de novo* assemblies compared to the T2T Y reference sequence.  
 963 Each dot represents an individual cDNA read, and its position on the x-axis represents the numeric difference  
 964 between percent identity of the read alignment to the T2T Y reference and the alignment to the best-matching *de*  
 965 *novo* Y assembly. Gene IDs are based on alignment position to the reference.

966

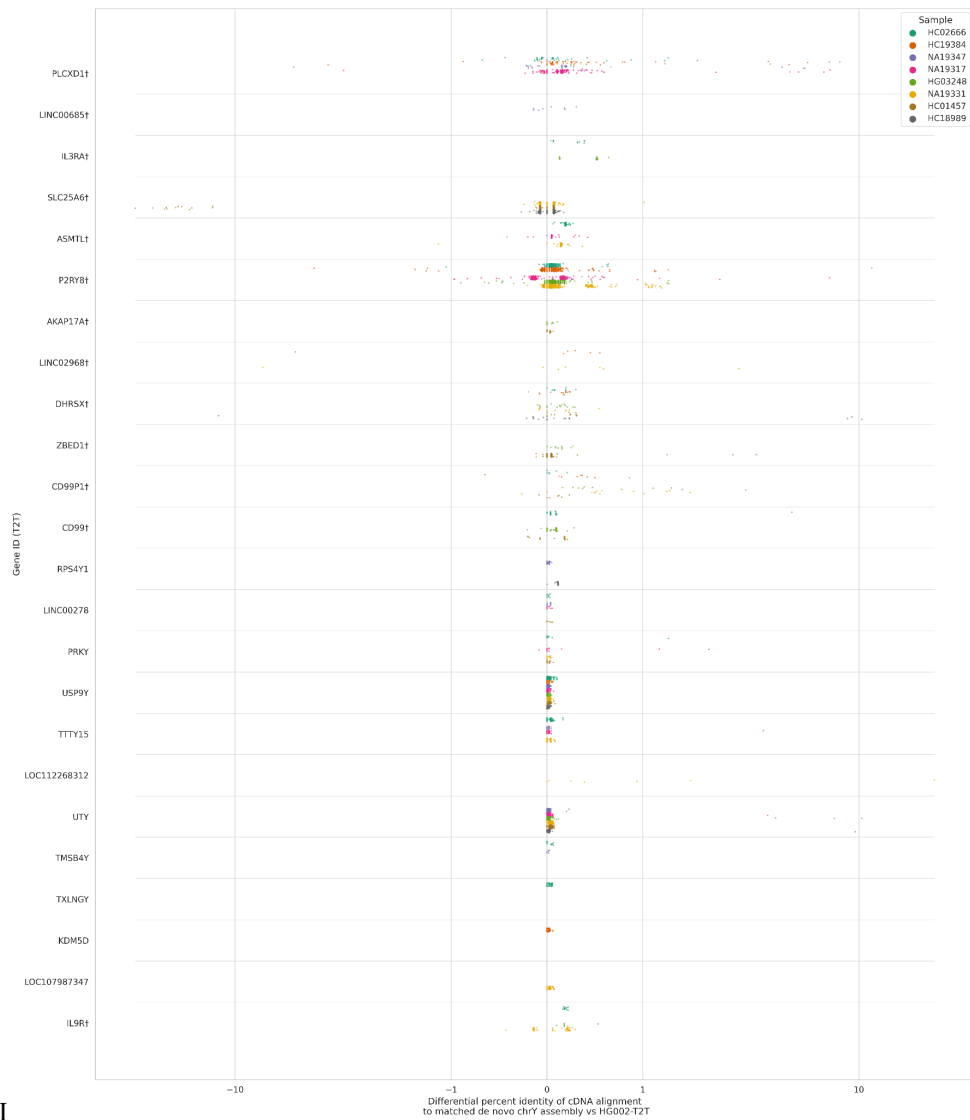

967

I

968

969

970

971

972

973

**Figure S61:** Iso-seq percent identity to matched *de novo* assemblies compared to the T2T Y reference sequence. Each dot represents an individual cDNA read, and its position on the x-axis represents the numeric difference between percent identity of the read alignment to the T2T Y reference and the alignment to its sample-matched *de novo* Y assembly. Gene IDs are based on alignment position to the reference, with † indicating genes located in either PAR. Colors specify the sample for both the Iso-Seq library and *de novo* assembly.

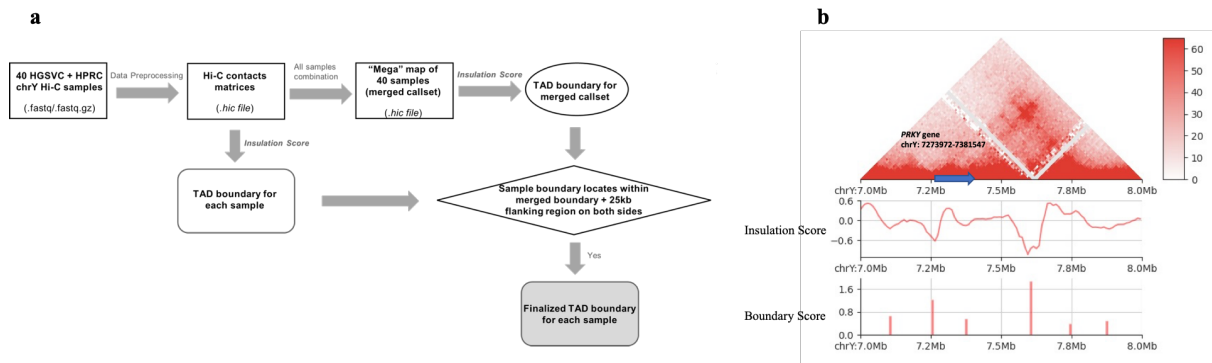

975

976

977

978

979

980

981

982

983

984

985

**Figure S62.** A step-by-step workflow to generate TAD boundaries in our chrY Hi-C analysis pipeline and a visualization of the chrY Hi-C merged callset calling results generated in our pipeline. **a.** 40 samples’ raw reads were used as an input in Juicer to do preprocessing and create Hi-C maps which were binned at multiple resolutions. Insulation score algorithm was applied to call TAD boundaries for each sample on each of those 40 .hic files separately. All 40 .hic files were then merged together to create a “mega” map and used as an input of insulation score algorithm to call TAD boundaries for the chrY merged callset. A finalized TAD boundary results for each sample were defined as those sample boundaries located within the merged boundary plus 25 kb flanking regions on the left side of the boundary start site and the right side of the boundary end site. **b.** The Hi-C contact map, the insulation score and the boundary strength for the merged callset over the region chrY: 7Mb-8Mb. The blue arrow shows where the *PRKY* gene is.

986 a

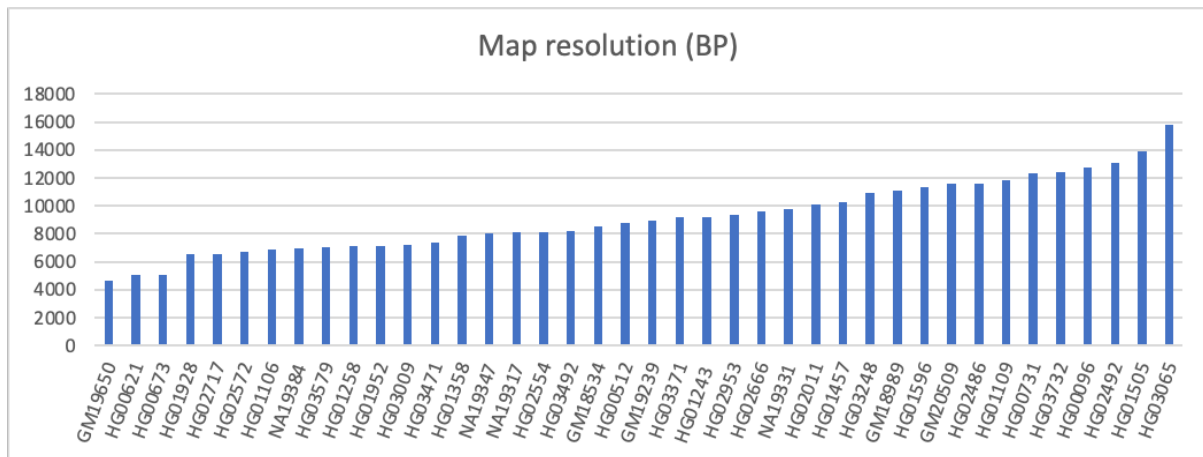

987

988 b

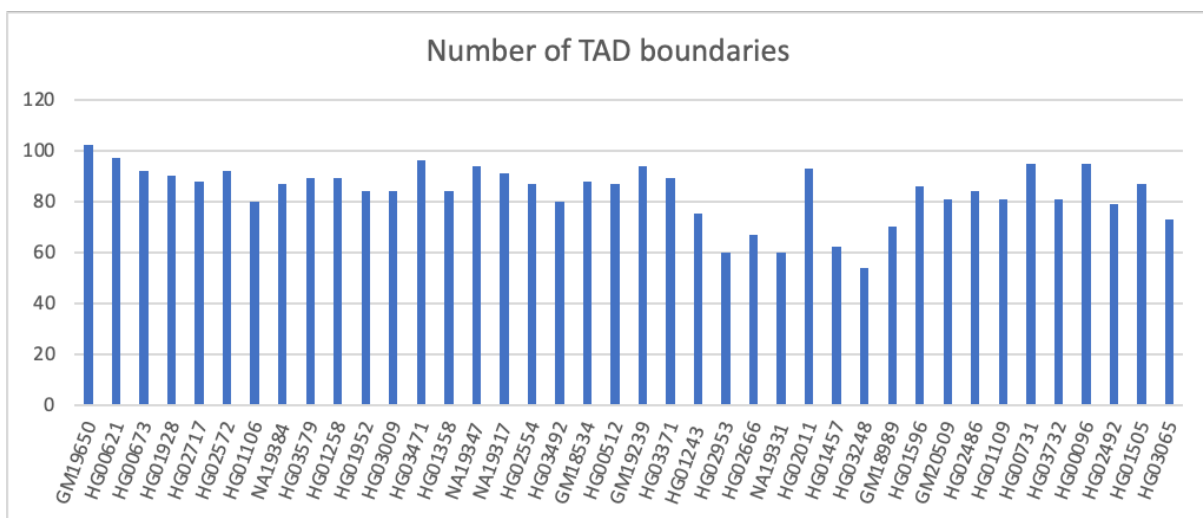

989

990 **Figure S63.** The map resolution (bp) for 40 Hi-C samples and the corresponding TAD boundaries detected by  
991 our strategy. **a.** As described in <sup>30</sup>, the map resolution was calculated by calculate\_map\_resolution.sh script given  
992 by Juicer. The highest resolution is 4,650 bp while the lowest resolution is 15,800 bp. To average, 10 kbp  
993 resolution was chosen for the further analysis. **b.** The number the TAD boundaries for each sample which were  
994 redefined from the workflow shown in **Figure S62.**  
995

- 997 1. Cheng, H., Concepcion, G. T., Feng, X., Zhang, H. & Li, H. Haplotype-resolved de novo  
998 assembly using phased assembly graphs with hifiasm. *Nat. Methods* **18**, 170–175 (2021).
- 999 2. Skaletsky, H. *et al.* The male-specific region of the human Y chromosome is a mosaic of discrete  
1000 sequence classes. *Nature* **423**, 825–837 (2003).
- 1001 3. Kuderna, L. F. K. *et al.* Selective single molecule sequencing and assembly of a human Y  
1002 chromosome of African origin. *Nat. Commun.* **10**, 4 (2019).
- 1003 4. Rhie, A. *et al.* The complete sequence of a human Y chromosome. bioRxiv 2022
- 1004 5. Repping, S. *et al.* A family of human Y chromosomes has dispersed throughout northern Eurasia  
1005 despite a 1.8-Mb deletion in the azoospermia factor c region. *Genomics* **83**, 1046–1052 (2004).
- 1006 6. Skov, L., Danish Pan Genome Consortium & Schierup, M. H. Analysis of 62 hybrid assembled  
1007 human Y chromosomes exposes rapid structural changes and high rates of gene conversion. *PLoS*  
1008 *Genet.* **13**, e1006834 (2017).
- 1009 7. Teitz, L. S., Pyntikova, T., Skaletsky, H. & Page, D. C. Selection Has Countered High Mutability  
1010 to Preserve the Ancestral Copy Number of Y Chromosome Amplicons in Diverse Human  
1011 Lineages. *Am. J. Hum. Genet.* **103**, 261–275 (2018).
- 1012 8. Shi, W. *et al.* Evolutionary and functional analysis of RBMY1 gene copy number variation on the  
1013 human Y chromosome. *Hum. Mol. Genet.* **28**, 2785–2798 (2019).
- 1014 9. Repping, S. *et al.* High mutation rates have driven extensive structural polymorphism among  
1015 human Y chromosomes. *Nat. Genet.* **38**, 463–467 (2006).
- 1016 10. Porubsky, D. *et al.* Recurrent inversion polymorphisms in humans associate with genetic  
1017 instability and genomic disorders. *Cell* **185**, 1986–2005.e26 (2022).
- 1018 11. Repping, S. *et al.* Recombination between palindromes P5 and P1 on the human Y chromosome  
1019 causes massive deletions and spermatogenic failure. *Am. J. Hum. Genet.* **71**, 906–922 (2002).
- 1020 12. Cooke, H. J., Schmidtke, J. & Gosden, J. R. Characterisation of a human Y chromosome repeated  
1021 sequence and related sequences in higher primates. *Chromosoma* **87**, 491–502 (1982).
- 1022 13. Schmid, M., Guttenbach, M., Nanda, I., Studer, R. & Epplen, J. T. Organization of DYZ2  
1023 repetitive DNA on the human Y chromosome. *Genomics* **6**, 212–218 (1990).
- 1024 14. Nakahori, Y., Mitani, K., Yamada, M. & Nakagome, Y. A human Y-chromosome specific  
1025 repeated DNA family (DYZ1) consists of a tandem array of pentanucleotides. *Nucleic Acids*  
1026 *Research* vol. 14 7569–7580 Preprint at <https://doi.org/10.1093/nar/14.19.7569> (1986).
- 1027 15. Cooke, H. J. & McKay, R. D. Evolution of a human Y chromosome-specific repeated sequence.  
1028 *Cell* **13**, 453–460 (1978).
- 1029 16. Rahman, M. M., Bashamboo, A., Prasad, A., Pathak, D. & Ali, S. Organizational variation of  
1030 DYZ1 repeat sequences on the human Y chromosome and its diagnostic potentials. *DNA Cell*

- 1031 *Biol.* **23**, 561–571 (2004).
- 1032 17. Pathak, D., Premi, S., Srivastava, J., Chandy, S. P. & Ali, S. Genomic instability of the DYZ1  
1033 repeat in patients with Y chromosome anomalies and males exposed to natural background  
1034 radiation. *DNA Res.* **13**, 103–109 (2006).
- 1035 18. Yadav, S. K., Kumari, A., Javed, S. & Ali, S. DYZ1 arrays show sequence variation between the  
1036 monozygotic males. *BMC Genet.* **15**, 19 (2014).
- 1037 19. Eddy, S. R. Accelerated Profile HMM Searches. *PLoS Comput. Biol.* **7**, e1002195 (2011).
- 1038 20. Cooke, H. J., Fantès, J. & Green, D. Structure and evolution of human Y chromosome DNA.  
1039 *Differentiation* **23 Suppl**, S48–55 (1983).
- 1040 21. Manz, E., Alkan, M., Bühler, E. & Schmidtke, J. Arrangement of DYZ1 and DYZ2 repeats on the  
1041 human Y-chromosome: a case with presence of DYZ1 and absence of DYZ2. *Mol. Cell. Probes*  
1042 **6**, 257–259 (1992).
- 1043 22. Ray, D. A., Xing, J., Salem, A.-H. & Batzer, M. A. SINEs of a nearly perfect character. *Syst.*  
1044 *Biol.* **55**, 928–935 (2006).
- 1045 23. Smith, G. P. Evolution of repeated DNA sequences by unequal crossover. *Science* **191**, 528–535  
1046 (1976).
- 1047 24. Stevison, L. S., Hoehn, K. B. & Noor, M. A. F. Effects of inversions on within- and between-  
1048 species recombination and divergence. *Genome Biol. Evol.* **3**, 830–841 (2011).
- 1049 25. Simpson, J. T. *et al.* Detecting DNA cytosine methylation using nanopore sequencing. *Nat.*  
1050 *Methods* **14**, 407–410 (2017).
- 1051 26. Snajder, R., Leger, A., Stegle, O. & Bonder, M. J. pycoMeth: A toolbox for differential  
1052 methylation testing from Nanopore methylation calls. *bioRxiv* 2022.02.16.480699 (2022)  
1053 doi:10.1101/2022.02.16.480699.
- 1054 27. Lappalainen, T. *et al.* Transcriptome and genome sequencing uncovers functional variation in  
1055 humans. *Nature* **501**, 506–511 (2013).
- 1056 28. Crane, E. *et al.* Condensin-driven remodelling of X chromosome topology during dosage  
1057 compensation. *Nature* **523**, 240–244 (2015).
- 1058 29. Kuroda-Kawaguchi, T. *et al.* The AZFc region of the Y chromosome features massive  
1059 palindromes and uniform recurrent deletions in infertile men. *Nat. Genet.* **29**, 279–286 (2001).
- 1060 30. Rao, S. S. P. *et al.* A 3D Map of the Human Genome at Kilobase Resolution Reveals Principles  
1061 of Chromatin Looping. *Cell* **159**, 1665–1680 (2014).

1062
